# Supplementary material for: Constructing and Optimizing 3D Atlases From 2D Data With Application to the Developing Mouse Brain
Source: bioRxiv preprint, doi:10.1101/2020.04.01.017665, version 3 (2020-07-23)
Supplement: Supplemental Table 1 [file 017665_file03.xlsx]

## Sheet: ABA-E11pt5
	Region	RegionAbbr	RegionName	Level	Parent	RGB
0	15570	POR	preoptic roof plate	5	15564	[113 168 117]
1	15576	POA	preoptic alar plate	5	15564	[246 103 203]
2	15614	POHv	ventricular zone of POH	9	15564	[149 236 27]
3	15615	POHm	mantle zone of POH	9	15564	[ 14 213 200]
4	15623	THyA	alar part of terminal hypothalamus	5	15564	[249 205 123]
5	15625	TPaAv	ventricular zone of TPaA	9	15564	[ 38 166 45]
6	15626	TPaAm	mantle zone of TPaA	9	15564	[137 111 117]
7	15637	ENv	ventricular zone of neural retina	9	15564	[121 149 22]
8	15654	TSPaAv	ventricular zone of TSPaA	9	15564	[159 161 241]
9	15655	TSPaAm	mantle zone of TSPaA	9	15564	[ 98 117 180]
10	15668	THyB-Dv	ventricular zone of THyB-D	9	15564	[173 174 61]
11	15669	THyB-Dm	mantle zone of THyB-D	9	15564	[138 99 149]
12	15685	THyB-Iv	ventricular zone of THyB-I	9	15564	[252 35 61]
13	15686	THyB-Im	mantle zone of THyB-I	9	15564	[170 72 124]
14	15736	THyF	floor of terminal hypothalamus	5	15564	[ 48 37 170]
15	15740	TelR	roof plate of evaginated telencephalic vesicle	5	15564	[ 58 100 211]
16	15750	TelA	alar plate of evaginated telencephalic vesicle	5	15564	[215 33 249]
17	16206	TelHv	ventricular zone of TelH	9	15564	[249 158 191]
18	16207	TelHm	mantle zone of TelH	9	15564	[79 62 82]
19	16212	PHyA	alar part of peduncular hypothalamus	5	15564	[ 87 111 39]
20	16214	PPav	ventricular zone of PPaA	9	15564	[148 119 138]
21	16215	PPam	mantle zone of PPaA	9	15564	[151 237 88]
22	16234	PSPav	ventricular zone of PSPa	9	15564	[ 42 185 80]
23	16235	PSPam	mantle zone of PSPa	9	15564	[153 14 213]
24	16247	PHyB	basal peduncular hypothalamus	5	15564	[176 76 190]
25	16249	PHyB-Dv	ventricular zone of PHyB-D	9	15564	[111 151 155]
26	16250	PHyB-Dm	mantle zone of PHyB-D	9	15564	[ 64 243 119]
27	16296	RMav	ventricular zone of RMa	9	15564	[181 82 209]
28	16297	RMam	mantle zone of RMa	9	15564	[225 152 226]
29	16306	PHyF	floor of peduncular hypothalamus	5	15564	[187 132 244]
30	16311	p3R	roof plate of p3	5	15564	[113 158 22]
31	16313	p3A	alar plate of p3 (alar prethalamus)	5	15564	[171 81 161]
32	16316	PThEv	ventricular zone of PThE	9	15564	[ 68 83 149]
33	16317	PThEm	mantle zone of PThE	9	15564	[150 170 169]
34	16324	RtCv	ventricular zone of RtC	9	15564	[229 100 116]
35	16325	RtCm	mantle zone of RtC	9	15564	[207 182 34]
36	16354	p3Bv	ventricular zone of p3B	9	15564	[184 254 46]
37	16355	p3Bm	mantle zone of p3B	9	15564	[ 49 160 40]
38	16368	p3F	floor plate of p3	5	15564	[207 149 109]
39	16377	p2R	roof plate of p2 (epithalamic roofplate)	5	15564	[180 121 186]
40	16382	p2A	alar plate of p2 (alar thalamus)	5	15564	[249 219 12]
41	16385	Hbv	ventricular zone of Hb	9	15564	[188 52 137]
42	16386	Hbm	mantle zone of Hb	9	15564	[ 58 14 204]
43	16488	p2Bv	ventricular zone of p2B	9	15564	[ 94 237 182]
44	16489	p2Bm	mantle zone of p2B	9	15564	[ 50 162 151]
45	16502	p2F	floor plate of p2	5	15564	[238 160 141]
46	16511	p1R	roof plate of p1	5	15564	[188 86 107]
47	16513	PComv	ventricular zone of PCom	9	15564	[ 55 241 191]
48	16515	PComm	mantle zone of PCom	9	15564	[65 72 38]
49	16519	p1A	alar plate of p1	5	15564	[ 86 180 102]
50	16625	p1Bv	ventricular zone of p1B	9	15564	[ 16 26 176]
51	16626	p1Bm	mantle zone of p1B	9	15564	[141 229 252]
52	16641	p1F	floor plate of p1	5	15564	[172 74 15]
53	16652	m1R	roof plate of m1	5	15564	[140 103 154]
54	16658	m1A	alar plate of m1	5	15564	[164 223 77]
55	16660	m1ADv	ventricular zone of m1AD	9	15564	[ 55 243 178]
56	16661	m1ADm	mantle zone of m1AD	9	15564	[242 189 72]
57	16670	TGv	ventricular zone of TG	9	15564	[136 25 60]
58	16671	TGm	mantle zone of TG	9	15564	[101 123 124]
59	16679	SCv	ventricular zone of SC	9	15564	[221 38 136]
60	16680	SCm	mantle zone of SC	9	15564	[185 107 148]
61	16693	ICv	ventricular zone of IC	9	15564	[ 71 129 97]
62	16694	ICm	mantle zone of IC	9	15564	[197 193 231]
63	16718	m1Limv	ventricular zone of m1Lim	9	15564	[145 153 245]
64	16719	m1Limm	mantle zone of m1Lim	9	15564	[69 34 22]
65	16727	m1Bv	ventricular zone of m1B	9	15564	[174 202 79]
66	16728	m1Bm	mantle zone of m1B	9	15564	[ 25 128 249]
67	16742	m1F	floor plate of m1	5	15564	[ 92 245 66]
68	16753	m2R	m2 roof	5	15564	[240 205 164]
69	16756	m2ADv	ventricular zone of m2AD	9	15564	[ 81 217 161]
70	16757	m2ADm	mantle zone of m2AD	9	15564	[ 95 46 250]
71	16763	m2ADLv	ventricular zone of m2ADL	9	15564	[131 166 100]
72	16772	m2ALv	ventricular zone of m2AL	9	15564	[211 56 135]
73	16773	m2ALm	mantle zone of m2AL	9	15564	[ 33 221 248]
74	16782	m2Limv	ventricular zone of m2Lim	9	15564	[232 199 91]
75	16792	m2Bv	ventricular zone of m2B	9	15564	[109 66 66]
76	16793	m2Bm	mantle zone of m2B	9	15564	[187 12 198]
77	16805	m2F	m2 floor plate	5	15564	[ 29 31 174]
78	16811	isR	isthmic roof plate	5	15564	[113 146 220]
79	16813	isA	isthmic alar plate	5	15564	[76 42 36]
80	16817	CbVv	ventricular zone of cerebellar vermis	9	15564	[ 74 121 177]
81	16818	CbVm	mantle zone of cerebellar vermis	9	15564	[ 79 103 86]
82	16866	isLimv	ventricular zone of isLim	9	15564	[ 23 180 200]
83	16867	isLimm	mantle zone of isLim	9	15564	[116 101 153]
84	16876	isB	isthmic basal plate	5	15564	[100 92 122]
85	16911	isF	isthmic floor plate	5	15564	[205 28 137]
86	16916	r1R	r1 roof plate	5	15564	[151 245 168]
87	16919	r1A	r1 alar plate	5	15564	[183 134 141]
88	16967	r1B	r1 basal plate	5	15564	[ 78 65 106]
89	17022	r1F	r1 floor plate	5	15564	[ 55 231 143]
90	17024	r2R	r2 roof plate	5	15564	[226 122 187]
91	17025	r2A	r2 alar plate	5	15564	[231 179 181]
92	17091	r2F	r2 floor plate	5	15564	[195 165 68]
93	17094	r3R	r3 roof plate	5	15564	[205 244 122]
94	17095	r3A	r3 alar plate	5	15564	[220 122 243]
95	17155	r3F	r3 floor plate	5	15564	[211 232 209]
96	17157	r4R	r4 roof plate	5	15564	[164 107 25]
97	17158	r4A	r4 alar plate	5	15564	[ 73 218 18]
98	17182	r4B	r4 basal plate	5	15564	[97 97 22]
99	17219	r4F	r4 floor plate	5	15564	[108 237 34]
100	17222	r5R	r5 roof plate	5	15564	[223 121 90]
101	17250	r5B	r5 basal plate	5	15564	[160 18 13]
102	17289	r5F	r5 floor plate	5	15564	[41 71 64]
103	17291	r6R	r6 roof plate	5	15564	[42 19 38]
104	17351	r6F	r6 floor plate	5	15564	[248 252 110]
105	17354	r7R	r7 roof plate	5	15564	[166 130 252]
106	17415	r7F	r7 floor plate	5	15564	[201 80 69]
107	17417	r8R	r8 roof plate	5	15564	[ 70 173 136]
108	17418	r8A	r8 alar plate	5	15564	[145 80 183]
109	17437	r8B	r8 basal plate	5	15564	[ 98 213 236]
110	17475	r8F	r8 floor plate	5	15564	[ 66 95 209]
111	17477	r9R	r9 roof plate	5	15564	[247 231 82]
112	17478	r9A	r9 alar plate	5	15564	[ 71 35 242]
113	17537	r9F	r9 floor plate	5	15564	[178 24 189]
114	17539	r10R	r10 roof plate	5	15564	[121 102 101]
115	17540	r10A	r10 alar plate	5	15564	[ 68 82 120]
116	17562	r10B	r10 basal plate	5	15564	[215 68 133]
117	17595	r10F	r10 floor plate	5	15564	[165 222 240]
118	17597	r11R	r11 roof plate	5	15564	[181 247 253]
119	17598	r11A	r11 alar plate	5	15564	[43 81 47]
120	17650	r11F	r11 floor plate	5	15564	[ 66 158 103]
121	17651	SpC	spinal cord	1	15564	[247 143 77]
122	17652	SpR	SpC roof plate	5	15564	[229 109 145]
123	17653	SpA	SpC alar plate	5	15564	[121 108 111]
124	17692	SpB	SpC basal plate (anterior horn)	5	15564	[137 101 138]
125	17734	SpF	SpC floor plate	5	15564	[ 91 236 221]
126	111220530	POv	ventricular zone of PO	9	15564	[ 72 119 55]
127	111220532	POm	mantle zone of PO	9	15564	[191 176 162]
128	111220534	SPallv	ventricular zone of SPall	9	15564	[ 60 93 175]
129	111220536	SPallm	mantle zone of SPall	9	15564	[143 79 27]
130	111220548	Pallv	ventricular zone of Pall	9	15564	[ 17 101 139]
131	111220550	Pallm	mantle zone of Pall	9	15564	[ 31 109 23]
132	111220580	p3APVv	ventricular zone of p3APV	9	15564	[162 78 61]
133	111220582	p3APVm	mantle zone of p3APV	9	15564	[151 180 174]
134	111220588	p2ALv	ventricular zone of p2AL	9	15564	[ 10 168 157]
135	111220590	p2ALm	mantle zone of p2AL	9	15564	[245 14 180]
136	111220592	p2AAVv	ventricular zone of p2AAV	9	15564	[134 91 203]
137	111220594	p2AAVm	mantle zone of p2AAV	9	15564	[118 137 180]
138	111220596	PcPv	ventricular zone of PcP	9	15564	[ 65 110 162]
139	111220598	PcPm	mantle zone of PcP	9	15564	[161 42 250]
140	111220600	JcPv	ventricular zone of JcP	9	15564	[133 235 142]
141	111220602	JcPm	mantle zone of JcP	9	15564	[213 247 235]
142	111220604	CoPv	ventricular zone of CoP	9	15564	[ 52 105 243]
143	111220606	CoPm	mantle zone of CoP	9	15564	[ 49 227 119]
144	111220608	p1AVLv	ventricular zone of p1AVL	9	15564	[ 49 171 117]
145	111220610	p1AVLm	mantle zone of p1AVL	9	15564	[180 70 19]
146	111220612	isADLv	ventricular zone of isADL	9	15564	[ 24 232 191]
147	111220614	isADLm	mantle zone of isADL	9	15564	[174 139 84]
148	111220616	isBv	ventricular zone of isB	9	15564	[156 125 102]
149	111220618	isBm	mantle zone of isB	9	15564	[ 52 90 176]
150	111220620	r1Av	ventricular zone of r1A	9	15564	[158 127 125]
151	111220622	r1Am	mantle zone of r1A	9	15564	[136 159 121]
152	111220642	r1Bv	ventricular zone of r1B	9	15564	[247 42 33]
153	111220644	r1Bm	mantle zone of r1B	9	15564	[154 171 107]
154	111220646	r2Av	ventricular zone of r2A	9	15564	[ 96 186 166]
155	111220648	r2Am	mantle zone of r2A	9	15564	[249 227 197]
156	111220674	r2Bv	ventricular zone of r2B	9	15564	[92 46 39]
157	111220676	r2Bm	mantle zone of r2B	9	15564	[115 137 199]
158	111220678	r3Av	ventricular zone of r3A	9	15564	[ 38 57 154]
159	111220680	r3Am	mantle zone of r3A	9	15564	[217 239 250]
160	111220706	r3Bv	ventricular zone of r3B	9	15564	[103 46 177]
161	111220708	r3Bm	mantle zone of r3B	9	15564	[221 33 131]
162	111220710	r4Av	ventricular zone of r4A	9	15564	[ 69 51 220]
163	111220712	r4Am	mantle zone of r4A	9	15564	[125 60 121]
164	111220738	r4Bv	ventricular zone of r4B	9	15564	[113 219 38]
165	111220740	r4Bm	mantle zone of r4B	9	15564	[108 107 174]
166	111220742	r5Av	ventricular zone of r5A	9	15564	[184 166 107]
167	111220744	r5Am	mantle zone of r5A	9	15564	[160 27 211]
168	111220770	r5Bv	ventricular zone of r5B	9	15564	[187 141 37]
169	111220772	r5Bm	mantle zone of r5B	9	15564	[109 88 27]
170	111220774	r6Av	ventricular zone of r6A	9	15564	[ 36 158 182]
171	111220776	r6Am	mantle zone of r6A	9	15564	[244 35 222]
172	111220802	r6Bv	ventricular zone of r6B	9	15564	[141 173 138]
173	111220804	r6Bm	mantle zone of r6B	9	15564	[ 56 22 136]
174	111220806	r7Av	ventricular zone of r7A	9	15564	[101 64 46]
175	111220808	r7Am	mantle zone of r7A	9	15564	[64 54 74]
176	111220834	r7Bv	ventricular zone of r7B	9	15564	[ 26 219 49]
177	111220836	r7Bm	mantle zone of r7B	9	15564	[199 121 47]
178	111220838	r8Av	ventricular zone of r8A	9	15564	[116 139 151]
179	111220840	r8Am	mantle zone of r8A	9	15564	[194 237 17]
180	111220860	r8Bv	ventricular zone of r8B	9	15564	[106 225 179]
181	111220862	r8Bm	mantle zone of r8B	9	15564	[196 99 132]
182	111220864	r9Av	ventricular zone of r9A	9	15564	[ 99 116 131]
183	111220866	r9Am	mantle zone of r9A	9	15564	[ 77 138 60]
184	111220886	r9Bv	ventricular zone of r9B	9	15564	[ 21 247 10]
185	111220888	r9Bm	mantle zone of r9B	9	15564	[160 29 226]
186	111220890	r10Av	ventricular zone of r10A	9	15564	[246 134 83]
187	111220892	r10Am	mantle zone of r10A	9	15564	[238 137 75]
188	111220912	r10Bv	ventricular zone of r10B	9	15564	[101 15 70]
189	111220914	r10Bm	mantle zone of r10B	9	15564	[220 122 118]
190	111220916	r11Av	ventricular zone of r11A	9	15564	[225 241 253]
191	111220918	r11Am	mantle zone of r11A	9	15564	[246 204 175]
192	111220938	r11Bv	ventricular zone of r11B	9	15564	[ 63 50 236]
193	111220940	r11Bm	mantle zone of r11B	9	15564	[121 131 200]
194	111220942	SpAv	ventricular zone of SpA	9	15564	[ 44 114 216]
195	111220944	SpAm	mantle zone of SpA	9	15564	[55 48 84]
196	111220946	SpBv	ventricular zone of SpB	9	15564	[114 57 149]
197	111220948	SpBm	mantle zone of SpB	9	15564	[156 38 249]
198	126651582	v_POA	ventricles, preoptic alar plate	5	15564	[105 109 71]
199	126651590	v_THyA	ventricles, alar part of terminal hypothalamus	5	15564	[ 19 166 110]
200	126651594	v_THyB	ventricles, basal part of terminal hypothalamus	5	15564	[208 183 243]
201	126651614	v_TelA	ventricles, alar plate of evaginated telencephalic vesicle	5	15564	[229 198 97]
202	126651622	v_PHyA	ventricles, alar part of peduncular hypothalamus	5	15564	[ 80 224 37]
203	126651626	v_PHyB	ventricles, basal peduncular hypothalamus	5	15564	[ 54 108 192]
204	126651650	v_p3A	ventricles, alar plate of p3 (alar prethalamus)	5	15564	[129 15 114]
205	126651658	v_p3B	ventricles, basal plate of p3	5	15564	[ 61 238 62]
206	126651678	v_p2A	ventricles, alar plate of p2 (alar thalamus)	5	15564	[206 48 158]
207	126651686	v_p2B	ventricles, basal plate of p2	5	15564	[188 166 208]
208	126651706	v_p1A	ventricles, alar plate of p1	5	15564	[234 22 81]
209	126651714	v_p1B	ventricles, basal plate of p1	5	15564	[112 52 57]
210	126651738	v_m1A	ventricles, alar plate of m1	5	15564	[125 226 189]
211	126651746	v_m1B	ventricles, basal plate of m1	5	15564	[101 136 227]
212	126651766	v_m2A	ventricles, m2 alar plate	5	15564	[ 11 180 235]
213	126651774	v_m2B	ventricles, m2 basal plate	5	15564	[ 53 128 70]
214	126651798	v_isA	ventricles, isthmic alar plate	5	15564	[239 236 79]
215	126651802	v_isB	ventricles, isthmic basal plate	5	15564	[157 245 46]
216	126651818	v_r1A	ventricles, r1 alar plate	5	15564	[224 130 230]
217	126651822	v_r1B	ventricles, r1 basal plate	5	15564	[140 89 138]
218	126651830	v_r2	ventricles, rhombomere 2	3	15564	[116 97 234]
219	126651838	v_r2A	ventricles, r2 alar plate	5	15564	[188 81 151]
220	126651842	v_r2B	ventricles, r2 basal plate	5	15564	[204 94 198]
221	126651862	v_r3A	ventricles, r3 alar plate	5	15564	[ 44 222 118]
222	126651866	v_r3B	ventricles, r3 basal plate	5	15564	[119 149 162]
223	126651882	v_r4A	ventricles, r4 alar plate	5	15564	[222 163 108]
224	126651886	v_r4B	ventricles, r4 basal plate	5	15564	[208 95 61]
225	126651906	v_r5A	ventricles, r5 alar plate	5	15564	[224 235 39]
226	126651910	v_r5B	ventricles, r5 basal plate	5	15564	[ 52 38 230]
227	126651918	v_r6	ventricles, rhombomere 6	3	15564	[250 33 221]
228	126651926	v_r6A	ventricles, r6 alar plate	5	15564	[100 93 195]
229	126651930	v_r6B	ventricles, r6 basal plate	5	15564	[171 136 128]
230	126651950	v_r7A	ventricles, r7 alar plate	5	15564	[145 212 187]
231	126651954	v_r7B	ventricles, r7 basal plate	5	15564	[199 63 231]
232	126651970	v_r8A	ventricles, r8 alar plate	5	15564	[ 91 54 126]
233	126651974	v_r8B	ventricles, r8 basal plate	5	15564	[83 73 90]
234	126651990	v_r9A	ventricles, r9 alar plate	5	15564	[44 65 41]
235	126651994	v_r9B	ventricles, r9 basal plate	5	15564	[106 86 186]
236	126652010	v_r10A	ventricles, r10 alar plate	5	15564	[188 209 63]
237	126652014	v_r10B	ventricles, r10 basal plate	5	15564	[78 81 54]
238	126652030	v_r11A	ventricles, r11 alar plate	5	15564	[127 137 219]
239	126652034	v_r11B	ventricles, r11 basal plate	5	15564	[ 63 162 37]
240	126652050	v_SpA	ventricles, SpC alar plate	5	15564	[ 88 138 128]
241	126652054	v_SpB	ventricles, SpC basal plate (anterior horn)	5	15564	[ 26 225 190]

## Sheet: ABA-E13pt5
	Region	RegionAbbr	RegionName	Level	Parent	RGB
0	15570	POR	preoptic roof plate	5	15564	[113 168 117]
1	15576	POA	preoptic alar plate	5	15564	[246 103 203]
2	15579	LTerv	ventricular zone of LTer	9	15564	[149 236 27]
3	15585	LTers	superficial stratum of the LTer	10	15564	[ 14 213 200]
4	15588	PO1v	ventricular zone of PO1	9	15564	[249 205 123]
5	15590	PO1p	periventricular stratum of PO1	10	15564	[ 38 166 45]
6	15593	PO1i	intermediate stratum of PO1	10	15564	[137 111 117]
7	15597	PO1s	superficial stratum of PO1	10	15564	[121 149 22]
8	15600	PO2v	ventricular zone of PO2	9	15564	[159 161 241]
9	15602	PO2p	periventricular stratum of PO2	10	15564	[ 98 117 180]
10	15608	PO2i	intermediate stratum of PO2	10	15564	[173 174 61]
11	15610	PO2s	superficial stratum of PO2	10	15564	[138 99 149]
12	15614	POHv	ventricular zone of POH	9	15564	[252 35 61]
13	15616	POHp	periventricular stratum of POH	10	15564	[170 72 124]
14	15617	POHi	intermediate stratum of POH	10	15564	[ 48 37 170]
15	15620	POHs	superficial stratum of POH	10	15564	[ 58 100 211]
16	15623	THyA	alar part of terminal hypothalamus	5	15564	[215 33 249]
17	15625	TPaAv	ventricular zone of TPaA	9	15564	[249 158 191]
18	15627	TPaAp	periventricular stratum of TPaA	10	15564	[79 62 82]
19	15629	TPaAi	intermediate stratum of TPaA	10	15564	[ 87 111 39]
20	15632	TPaAs	superficial stratum of TPaA	10	15564	[148 119 138]
21	15654	TSPaAv	ventricular zone of TSPaA	9	15564	[151 237 88]
22	15656	TSPaAp	periventricular stratum of TSPaA	10	15564	[ 42 185 80]
23	15659	TSPaAi	intermediate stratum of TSPaA	10	15564	[153 14 213]
24	15663	TSPaAs	superficial stratum of TSPaA	10	15564	[176 76 190]
25	15666	THyB	basal part of terminal hypothalamus	5	15564	[111 151 155]
26	15668	THyB-Dv	ventricular zone of THyB-D	9	15564	[ 64 243 119]
27	15670	THyB-Dp	periventricular stratum of THyB-D	10	15564	[181 82 209]
28	15673	THyB-Di	intermediate stratum of THyB-D	10	15564	[225 152 226]
29	15680	THyB-Ds	superficial stratum of THyB-D	10	15564	[187 132 244]
30	15685	THyB-Iv	ventricular zone of THyB-I	9	15564	[113 158 22]
31	15686	THyB-Im	mantle zone of THyB-I	9	15564	[171 81 161]
32	15687	THyB-Ip	periventricular stratum of THyB-I	10	15564	[ 68 83 149]
33	15693	THyB-Ii	intermediate stratum of THyB-I	10	15564	[150 170 169]
34	15699	THyB-Is	superficial stratum of THyB-I	10	15564	[229 100 116]
35	15703	THyB-Vv	ventricular zone of THyB-V	9	15564	[207 182 34]
36	15705	THyB-Vm	mantle zone of THyB-V	9	15564	[184 254 46]
37	15706	THyB-Vp	periventricular stratum of THyB-V	10	15564	[ 49 160 40]
38	15708	THyB-Vi	intermediate stratum of THyB-V	10	15564	[207 149 109]
39	15710	THyB-Vs	superficial stratum of THyB-V	10	15564	[180 121 186]
40	15713	THyB-Pv	ventricular zone of THyB-P	9	15564	[249 219 12]
41	15715	THyB-Pm	mantle zone of THyB-P	9	15564	[188 52 137]
42	15718	THyB-Pi	intermediate stratum of THyB-P	10	15564	[ 58 14 204]
43	15720	THyB-Ps	superficial stratum of THyB-P	10	15564	[ 94 237 182]
44	15724	Mamv	ventricular zone of Mam	9	15564	[ 50 162 151]
45	15725	Mamm	mantle zone of Mam	9	15564	[238 160 141]
46	15733	Mams	superficial stratum of Mam	10	15564	[188 86 107]
47	15736	THyF	floor of terminal hypothalamus	5	15564	[ 55 241 191]
48	15740	TelR	roof plate of evaginated telencephalic vesicle	5	15564	[65 72 38]
49	15742	CSComv	ventricular zone of CSCom	9	15564	[ 86 180 102]
50	15748	CSComs	superficial stratum of CSCom	10	15564	[ 16 26 176]
51	15750	TelA	alar plate of evaginated telencephalic vesicle	5	15564	[141 229 252]
52	15754	DgSev	ventricular zone of DgSe	9	15564	[172 74 15]
53	15756	DgSep	periventricular stratum of DgSe	10	15564	[140 103 154]
54	15759	DgSei	intermediate stratum of DgSe	10	15564	[164 223 77]
55	15762	DgSes	superficial stratum of DgSe	10	15564	[ 55 243 178]
56	15766	PalSev	ventricular zone of PalSe	9	15564	[242 189 72]
57	15768	PalSep	periventricular stratum of PalSe	10	15564	[136 25 60]
58	15770	PalSei	intermediate stratum of PalSe	10	15564	[101 123 124]
59	15773	PalSes	superficial stratum of PalSe	10	15564	[221 38 136]
60	15775	StrSev	ventricular zone of StrSe	9	15564	[185 107 148]
61	15777	StrSep	periventricular part of StrSe	10	15564	[ 71 129 97]
62	15781	StrSei	intermediate part of StrSe	10	15564	[197 193 231]
63	15783	StrSes	superficial part of StrSe	10	15564	[145 153 245]
64	15786	SeDgv	ventricular zone of SeDg	9	15564	[69 34 22]
65	15788	SeDgp	periventricular stratum of SeDg	10	15564	[174 202 79]
66	15792	SeDgi	intermediate stratum of SeDg	10	15564	[ 25 128 249]
67	15795	SeDgs	superficial stratum of SeDg	10	15564	[ 92 245 66]
68	15798	SePalv	ventricular zone of SePal	9	15564	[240 205 164]
69	15800	SePalp	periventricular stratum of SePal	10	15564	[ 81 217 161]
70	15803	SePali	intermediate stratum of SePal	10	15564	[ 95 46 250]
71	15806	SePals	superficial stratum of SePal	10	15564	[131 166 100]
72	15810	SeStrv	ventricular zone of SeStr	9	15564	[211 56 135]
73	15812	SeStrp	periventricular stratum of SeStr	10	15564	[ 33 221 248]
74	15814	SeStri	intermediate stratum of SeStr	10	15564	[232 199 91]
75	15816	SeStrs	superficial stratum of SeStr	10	15564	[109 66 66]
76	15820	Dgv	ventricular zone of Dg	9	15564	[187 12 198]
77	15822	Dgp	periventricular stratum of Dg	10	15564	[ 29 31 174]
78	15828	Dgi	intermediate stratum of Dg	10	15564	[113 146 220]
79	15831	Dgs	superficial stratum of Dg	10	15564	[76 42 36]
80	15835	Palv	ventricular zone of Pal	9	15564	[ 74 121 177]
81	15837	Palp	periventricular stratum of Pal	10	15564	[ 79 103 86]
82	15842	Pali	intermediate stratum of Pal	10	15564	[ 23 180 200]
83	15845	Pals	superficial stratum of Pal	10	15564	[116 101 153]
84	15852	Strv	ventricular zone of Str	9	15564	[100 92 122]
85	15854	Strp	periventricular stratum of Str	10	15564	[205 28 137]
86	15856	Stri	intermediate stratum of Str	10	15564	[151 245 168]
87	15861	Strs	superficial stratum of Str	10	15564	[183 134 141]
88	15869	AStrv	ventricular zone of AStr	9	15564	[ 78 65 106]
89	15871	AStrp	periventricular stratum of AStr	10	15564	[ 55 231 143]
90	15873	AStri	intermediate stratum of AStr	10	15564	[226 122 187]
91	15877	AStrs	superficial stratum of AStr	10	15564	[231 179 181]
92	15906	OBv	ventricular zone of OB	9	15564	[195 165 68]
93	15908	OBp	periventricular stratum of OB	10	15564	[205 244 122]
94	15911	OBi	intermediate stratum of OB	10	15564	[220 122 243]
95	15914	OBs	superficial stratum of OB	10	15564	[211 232 209]
96	15918	AOVv	ventricular zone of AOV	9	15564	[164 107 25]
97	15920	AOVp	periventricular stratum of AOV	10	15564	[ 73 218 18]
98	15921	AOVi	intermediate stratum of AOV	10	15564	[97 97 22]
99	15922	AOVs	superficial stratum of AOV	10	15564	[108 237 34]
100	15929	VPrPv	ventricular zone of VPrP	9	15564	[223 121 90]
101	15931	VPrPp	periventricular stratum of VPrP	10	15564	[160 18 13]
102	15932	VPrPi	intermediate stratum of VPrP	10	15564	[41 71 64]
103	15936	VPrPs	superficial stratum of VPrP	10	15564	[42 19 38]
104	15941	VAPv	ventricular zone of the VAP	9	15564	[248 252 110]
105	15943	VAPp	periventricular stratum of the VAP	10	15564	[166 130 252]
106	15946	VAPi	intermediate stratum of the VAP	10	15564	[201 80 69]
107	15949	VAPs	superficial stratum of the VAP	10	15564	[ 70 173 136]
108	15970	AODv	ventricular zone of AOD	9	15564	[145 80 183]
109	15972	AODp	periventricular stratum of AOD	10	15564	[ 98 213 236]
110	15973	AODi	intermediate stratum of AOD	10	15564	[ 66 95 209]
111	15974	AODs	superficial stratum of AOD	10	15564	[247 231 82]
112	15980	LPrPv	ventricular zone of LPrP	9	15564	[ 71 35 242]
113	15982	LPrPp	periventricular stratum of LPrP	10	15564	[178 24 189]
114	15983	LPrPi	intermediate stratum of LPrP	10	15564	[121 102 101]
115	15985	LPrPs	superficial stratum of LPrP	10	15564	[ 68 82 120]
116	16199	SePallv	ventricular zone of SePall	9	15564	[215 68 133]
117	16201	SePallp	periventricular stratum of SePall	10	15564	[165 222 240]
118	16202	SePalli	intermediate stratum of SePall	10	15564	[181 247 253]
119	16203	SePalls	superficial stratum of SePall	10	15564	[43 81 47]
120	16206	TelHv	ventricular zone of TelH	9	15564	[ 66 158 103]
121	16208	TelHp	periventricular stratum of TelH	10	15564	[247 143 77]
122	16209	TelHi	intermediate stratum of TelH	10	15564	[229 109 145]
123	16210	TelHs	superficial stratum of TelH	10	15564	[121 108 111]
124	16212	PHyA	alar part of peduncular hypothalamus	5	15564	[137 101 138]
125	16214	PPav	ventricular zone of PPaA	9	15564	[ 91 236 221]
126	16216	PPap	periventricular stratum of PPaA	10	15564	[ 72 119 55]
127	16225	PPai	intermediate stratum of PPaA	10	15564	[191 176 162]
128	16231	PPas	superficial stratum of PPaA	10	15564	[ 60 93 175]
129	16234	PSPav	ventricular zone of PSPa	9	15564	[143 79 27]
130	16236	PSPap	periventricular stratum of PSPa	10	15564	[ 17 101 139]
131	16239	PSPai	intermediate stratum of PSPa	10	15564	[ 31 109 23]
132	16244	PSPas	superficial stratum of PSPa	10	15564	[162 78 61]
133	16249	PHyB-Dv	ventricular zone of PHyB-D	9	15564	[151 180 174]
134	16251	PHyB-Dp	periventricular stratum of PHyB-D	10	15564	[ 10 168 157]
135	16253	PHyB-Di	intermediate stratum of PHyB-D	10	15564	[245 14 180]
136	16260	PHyB-Iv	ventricular zone of PHyB-I	9	15564	[134 91 203]
137	16262	PHyB-Ip	periventricular stratum of PHyB-I	10	15564	[118 137 180]
138	16264	PHyB-Ii	intermediate stratum of PHyB-I	10	15564	[ 65 110 162]
139	16275	PHyB-Vv	ventricular zone of PHyB-V	9	15564	[161 42 250]
140	16280	PHyB-Vi	intermediate stratum of PHyB-V	10	15564	[133 235 142]
141	16286	PHyB-Pv	ventricular zone of PHyB-P	9	15564	[213 247 235]
142	16290	PHyB-Pi	intermediate stratum of PHyB-P	10	15564	[ 52 105 243]
143	16296	RMav	ventricular zone of RMa	9	15564	[ 49 227 119]
144	16297	RMam	mantle zone of RMa	9	15564	[ 49 171 117]
145	16306	PHyF	floor of peduncular hypothalamus	5	15564	[180 70 19]
146	16307	RMaF	retromammillary floor	6	15564	[ 24 232 191]
147	16311	p3R	roof plate of p3	5	15564	[174 139 84]
148	16313	p3A	alar plate of p3 (alar prethalamus)	5	15564	[156 125 102]
149	16316	PThEv	ventricular zone of PThE	9	15564	[ 52 90 176]
150	16318	PThEp	periventricular stratum of PThE	10	15564	[158 127 125]
151	16319	PThEi	intermediate stratum of PThE	10	15564	[136 159 121]
152	16321	PThEs	superficial stratum of PThE	10	15564	[247 42 33]
153	16324	RtCv	ventricular zone of RtC	9	15564	[154 171 107]
154	16326	RtCp	periventricular stratum of RtC	10	15564	[ 96 186 166]
155	16328	RtCi	intermediate stratum of RtC	10	15564	[249 227 197]
156	16330	RtCs	superficial stratum of RtC	10	15564	[92 46 39]
157	16334	p3ZLv	ventricular zone of p3ZL	9	15564	[115 137 199]
158	16336	p3ZLp	periventricular stratum of p3ZL	10	15564	[ 38 57 154]
159	16338	p3ZLi	intermediate stratum of p3ZL	10	15564	[217 239 250]
160	16340	p3ZLs	superficial stratum of p3ZL	10	15564	[103 46 177]
161	16344	ZICv	ventricular zone of ZIC	9	15564	[221 33 131]
162	16346	ZICp	periventricular stratum of ZIC	10	15564	[ 69 51 220]
163	16348	ZICi	intermediate stratum of ZIC	10	15564	[125 60 121]
164	16350	ZICs	superficial stratum of ZIC	10	15564	[113 219 38]
165	16353	p3B	basal plate of p3	5	15564	[108 107 174]
166	16354	p3Bv	ventricular zone of p3B	9	15564	[184 166 107]
167	16356	p3Bp	periventricular stratum of p3B	10	15564	[160 27 211]
168	16358	p3Bi	intermediate stratum of p3B	10	15564	[187 141 37]
169	16364	p3Bs	superficial stratum of p3B	10	15564	[109 88 27]
170	16369	p3Fv	ventricular zone of p3F	9	15564	[ 36 158 182]
171	16371	p3Fp	periventricular stratum of p3F	10	15564	[244 35 222]
172	16372	p3Fi	intermediate stratum of p3F	10	15564	[141 173 138]
173	16373	p3Fs	superficial stratum of p3F	10	15564	[ 56 22 136]
174	16377	p2R	roof plate of p2 (epithalamic roofplate)	5	15564	[101 64 46]
175	16382	p2A	alar plate of p2 (alar thalamus)	5	15564	[64 54 74]
176	16385	Hbv	ventricular zone of Hb	9	15564	[ 26 219 49]
177	16387	Hbp	periventricular stratum of Hb	10	15564	[199 121 47]
178	16390	Hbi	intermediate stratum of Hb	10	15564	[116 139 151]
179	16393	Hbs	superficial stratum of Hb	10	15564	[194 237 17]
180	16397	DTThv	ventricular zone of DTTh	9	15564	[106 225 179]
181	16399	DTThp	periventricular stratum of DTTh	10	15564	[196 99 132]
182	16409	DTThi	intermediate stratum of DTTh	10	15564	[ 99 116 131]
183	16433	DTThs	superficial stratum of DTTh	10	15564	[ 77 138 60]
184	16438	ITThv	ventricular zone of ITTh	9	15564	[ 21 247 10]
185	16440	ITThp	periventricular stratum of ITTh	10	15564	[160 29 226]
186	16443	ITThi	intermediate stratum of ITTh	10	15564	[246 134 83]
187	16450	ITThs	superficial stratum of ITTh	10	15564	[238 137 75]
188	16454	VTThv	ventricular zone of VTTh	9	15564	[101 15 70]
189	16456	VTThp	periventricular stratum of VTTh	10	15564	[220 122 118]
190	16458	VTThi	intermediate stratum of VTTh	10	15564	[225 241 253]
191	16461	VTThs	superficial stratum of VTTh	10	15564	[246 204 175]
192	16470	p2ZLp	periventricular stratum of p2ZL	10	15564	[ 63 50 236]
193	16472	p2ZLi	intermediate stratum of p2ZL	10	15564	[121 131 200]
194	16474	p2ZLs	superficial stratum of p2ZL	10	15564	[ 44 114 216]
195	16477	p2Limv	ventricular zone of p2Lim	9	15564	[55 48 84]
196	16479	p2Limp	periventricular stratum of p2Lim	10	15564	[114 57 149]
197	16481	p2Limi	intermediate stratum of p2Lim	10	15564	[156 38 249]
198	16483	p2Lims	superficial stratum of p2Lim	10	15564	[105 109 71]
199	16487	p2B	basal plate of p2	5	15564	[ 19 166 110]
200	16488	p2Bv	ventricular zone of p2B	9	15564	[208 183 243]
201	16490	p2Bp	periventricular stratum of p2B	10	15564	[229 198 97]
202	16492	p2Bi	intermediate stratum of p2B	10	15564	[ 80 224 37]
203	16497	p2Bs	superficial stratum of p2B	10	15564	[ 54 108 192]
204	16503	p2Fv	ventricular zone of p2F	9	15564	[129 15 114]
205	16505	p2Fp	periventricular stratum of p2F	10	15564	[ 61 238 62]
206	16506	p2Fi	intermediate stratum of p2F	10	15564	[206 48 158]
207	16507	p2Fs	superficial stratum of p2F	10	15564	[188 166 208]
208	16513	PComv	ventricular zone of PCom	9	15564	[234 22 81]
209	16518	PComs	superficial zone of PCom	10	15564	[112 52 57]
210	16519	p1A	alar plate of p1	5	15564	[125 226 189]
211	16522	PcPDv	ventricular zone of PcPD	9	15564	[101 136 227]
212	16524	PcPDp	periventricular stratum of PcPD	10	15564	[ 11 180 235]
213	16526	PcPDi	intermediate stratum of PcPD	10	15564	[ 53 128 70]
214	16528	PcPDs	superficial stratum of PCPD	10	15564	[239 236 79]
215	16531	PcPLv	ventricular zone of PcPL	9	15564	[157 245 46]
216	16533	PcPLp	periventricular stratum of PcPL	10	15564	[224 130 230]
217	16535	PcPLi	intermediate stratum of PcPL	10	15564	[140 89 138]
218	16537	PcPLs	superficial stratum of PcPL	10	15564	[116 97 234]
219	16540	PcPVv	ventricular zone of PcPV	9	15564	[188 81 151]
220	16542	PcPVp	periventricular stratum of PcPV	10	15564	[204 94 198]
221	16544	PcPVi	intermediate stratum of PcPV	10	15564	[ 44 222 118]
222	16546	PcPVs	superficial stratum of PcPV	10	15564	[119 149 162]
223	16550	JcPDv	ventricular zone of JcPD	9	15564	[222 163 108]
224	16552	JcPDp	periventricular stratum of JcPD	10	15564	[208 95 61]
225	16554	JcPDi	intermediate stratum of JcPD	10	15564	[224 235 39]
226	16557	JcPDs	superficial stratum of JcPD	10	15564	[ 52 38 230]
227	16560	JcPLv	ventricular zone of JcPL	9	15564	[250 33 221]
228	16562	JcPLp	periventricular stratum of JcPL	10	15564	[100 93 195]
229	16564	JcPLi	intermediate stratum of JcPL	10	15564	[171 136 128]
230	16567	JcPLs	superficial stratum of JcPL	10	15564	[145 212 187]
231	16570	JcPVv	ventricular zone of JcPV	9	15564	[199 63 231]
232	16572	JcPVp	periventricular stratum of JcPV	10	15564	[ 91 54 126]
233	16574	JcPVi	intermediate stratum of JcPV	10	15564	[83 73 90]
234	16576	JcPVs	superficial stratum of JcPV	10	15564	[44 65 41]
235	16580	CoPDv	ventricular zone of CoPD	9	15564	[106 86 186]
236	16582	CoPDp	periventricular stratum of CoPD	10	15564	[188 209 63]
237	16584	CoPDi	intermediate stratum of CoPD	10	15564	[78 81 54]
238	16588	CoPDs	superficial stratum of CoPD	10	15564	[127 137 219]
239	16592	CoPLv	ventricular zone of CoPL	9	15564	[ 63 162 37]
240	16594	CoPLp	periventricular stratum of CoPL	10	15564	[ 88 138 128]
241	16596	CoPLi	intermediate stratum of CoPL	10	15564	[ 26 225 190]
242	16600	CoPLs	superficial stratum of CoPL	10	15564	[240 134 254]
243	16603	CoPVv	ventricular zone of CoPV	9	15564	[141 129 84]
244	16605	CoPVp	periventricular stratum of CoPV	10	15564	[235 207 187]
245	16607	CoPVi	intermediate stratum of CoPV	10	15564	[235 130 224]
246	16610	CoPVs	superficial stratum of CoPV	10	15564	[ 62 198 12]
247	16614	p1Limv	ventricular zone of p1Lim	9	15564	[ 66 134 190]
248	16616	p1Limp	periventricular stratum of p1Lim	10	15564	[136 239 66]
249	16618	p1Limi	intermediate stratum of p1Lim	10	15564	[155 19 126]
250	16621	p1Lims	superficial stratum of p1Lim	10	15564	[ 20 225 137]
251	16624	p1B	basal plate of p1	5	15564	[ 64 243 152]
252	16625	p1Bv	ventricular zone of p1B	9	15564	[ 80 121 23]
253	16627	p1Bp	periventricular stratum of p1B	10	15564	[129 109 154]
254	16631	p1Bi	intermediate stratum of p1B	10	15564	[ 67 162 166]
255	16636	p1Bs	superficial stratum of p1B	10	15564	[200 217 130]
256	16642	p1Fv	ventricular zone of p1F	9	15564	[253 41 125]
257	16644	p1Fp	periventricular stratum of p1F	10	15564	[241 246 186]
258	16646	p1Fi	intermediate stratum of p1F	10	15564	[72 74 65]
259	16647	p1Fs	superficial stratum of p1F	10	15564	[ 44 87 163]
260	16652	m1R	roof plate of m1	5	15564	[ 15 115 169]
261	16653	m1Rv	ventricular zone of m1R	9	15564	[126 247 75]
262	16658	m1A	alar plate of m1	5	15564	[128 72 211]
263	16660	m1ADv	ventricular zone of m1AD	9	15564	[ 86 203 185]
264	16662	m1ADp	periventricular stratum of m1AD	10	15564	[182 112 11]
265	16664	m1ADi	intermediate stratum of m1AD	10	15564	[135 30 35]
266	16666	m1ADs	superficial stratum of m1AD	10	15564	[220 47 10]
267	16670	TGv	ventricular zone of TG	9	15564	[ 78 55 179]
268	16672	TGp	periventricular stratum of TG	10	15564	[ 74 248 166]
269	16674	TGi	intermediate stratum of TG	10	15564	[107 199 44]
270	16676	TGs	superficial stratum of TG	10	15564	[220 161 20]
271	16679	SCv	ventricular zone of SC	9	15564	[233 138 96]
272	16681	SCp	periventricular stratum of SC	10	15564	[194 226 34]
273	16684	SCi	intermediate stratum of SC	10	15564	[ 14 246 160]
274	16688	SCs	superficial stratum of SC	10	15564	[ 82 237 75]
275	16693	ICv	ventricular zone of IC	9	15564	[251 201 137]
276	16695	ICp	periventricular stratum of IC	10	15564	[125 117 94]
277	16697	ICi	intermediate stratum of IC	10	15564	[ 97 79 118]
278	16699	ICs	superficial stratum of IC	10	15564	[137 18 232]
279	16718	m1Limv	ventricular zone of m1Lim	9	15564	[145 218 245]
280	16720	m1Limp	periventricular stratum of m1Lim	10	15564	[164 254 252]
281	16722	m1Limi	intermediate stratum of m1Lim	10	15564	[ 41 152 15]
282	16724	m1Lims	superficial stratum of m1Lim	10	15564	[244 90 166]
283	16726	m1B	basal plate of m1	5	15564	[242 188 90]
284	16727	m1Bv	ventricular zone of m1B	9	15564	[ 57 106 64]
285	16729	m1Bp	periventricular stratum of m1B	10	15564	[ 55 107 77]
286	16732	m1Bi	intermediate stratum of m1B	10	15564	[ 95 183 16]
287	16738	m1Bs	superficial stratum of m1B	10	15564	[ 66 75 206]
288	16742	m1F	floor plate of m1	5	15564	[ 87 212 35]
289	16743	m1Fv	ventricular zone of m1F	9	15564	[194 48 114]
290	16745	m1Fp	periventricular stratum of m1F	10	15564	[ 35 22 154]
291	16747	m1Fi	intermediate stratum of m1F	10	15564	[205 236 83]
292	16749	m1Fs	superficial stratum of m1F	10	15564	[129 154 251]
293	16754	m2A	m2 alar plate	5	15564	[105 74 241]
294	16756	m2ADv	ventricular zone of m2AD	9	15564	[186 236 172]
295	16761	m2ADs	superficial stratum of m2AD	10	15564	[ 58 100 183]
296	16772	m2ALv	ventricular zone of m2AL	9	15564	[237 222 209]
297	16774	m2ALp	periventricular stratum of m2AL	10	15564	[122 100 103]
298	16776	m2ALi	intermediate stratum of m2AL	10	15564	[173 80 14]
299	16778	m2ALs	superficial stratum of m2AL	10	15564	[ 85 240 227]
300	16782	m2Limv	ventricular zone of m2Lim	9	15564	[169 94 144]
301	16784	m2Limp	periventricular stratum of m2Lim	10	15564	[ 34 206 20]
302	16786	m2Limi	intermediate stratum of m2Lim	10	15564	[207 22 163]
303	16789	m2Lims	superficial stratum of m2Lim	10	15564	[ 51 46 199]
304	16791	m2B	m2 basal plate	5	15564	[250 250 253]
305	16792	m2Bv	ventricular zone of m2B	9	15564	[239 69 122]
306	16794	m2Bp	periventricular stratum of m2B	10	15564	[ 59 148 87]
307	16797	m2Bi	intermediate stratum of m2B	10	15564	[38 97 17]
308	16800	m2Bs	superficial stratum of m2B	10	15564	[172 108 31]
309	16811	isR	isthmic roof plate	5	15564	[ 78 51 246]
310	16812	isRv	ventricular zone of isR	9	15564	[207 153 149]
311	16817	CbVv	ventricular zone of cerebellar vermis	9	15564	[248 99 203]
312	16819	CbVp	periventricular stratum of cerebellar vermis	10	15564	[106 244 156]
313	16821	CbVi	intermediate stratum of cerebellar vermis	10	15564	[112 201 179]
314	16828	CbVs	superficial stratum of cerebellar vermis	10	15564	[ 73 195 122]
315	16866	isLimv	ventricular zone of isLim	9	15564	[243 249 221]
316	16868	isLimp	periventricular stratum of isLim	10	15564	[227 166 115]
317	16871	isLimi	intermediate stratum of isLim	10	15564	[198 133 202]
318	16874	isLims	superficial stratum of isLim	10	15564	[204 83 206]
319	16882	isBLi	intermediate stratum of isBL	10	15564	[125 175 15]
320	16885	isBLs	superficial stratum of isBL	10	15564	[ 81 250 44]
321	16888	isBIv	ventricular zone of isBI	9	15564	[35 91 88]
322	16890	isBIp	periventricular stratum of isBI	10	15564	[217 103 16]
323	16893	isBIi	intermediate stratum of isBI	10	15564	[171 47 254]
324	16895	isBIs	superficial stratum of isBI	10	15564	[222 82 116]
325	16898	isBMv	ventricular zone of isBM	9	15564	[175 239 162]
326	16900	isBMp	periventricular mantle of isBM	10	15564	[226 198 184]
327	16902	isBMi	intermediate mantle of isBM	10	15564	[107 51 211]
328	16911	isF	isthmic floor plate	5	15564	[226 246 199]
329	16912	isFv	ventricular zone of isF	9	15564	[160 19 13]
330	16916	r1R	r1 roof plate	5	15564	[211 222 245]
331	16919	r1A	r1 alar plate	5	15564	[ 20 233 84]
332	16922	CbHv	ventricular zone of CbH	9	15564	[250 108 173]
333	16925	CbHp	periventricular stratum of CbH	10	15564	[198 139 68]
334	16927	CbHi	intermediate stratum of CbH	10	15564	[ 73 140 182]
335	16938	CbHs	superficial stratum of cerebellar hemisphere	10	15564	[180 201 51]
336	16951	r1Vev	ventricular zone of r1Ve	9	15564	[111 178 82]
337	16955	r1Trv	ventricular zone of r1Tr	9	15564	[ 97 208 151]
338	16960	r1Limv	ventricular zone of r1Lim	9	15564	[ 29 100 197]
339	16967	r1B	r1 basal plate	5	15564	[183 197 80]
340	16975	r1BLi	intermediate stratum of r1BL	10	15564	[143 191 244]
341	16981	r1BLs	superficial stratum of r1BL	10	15564	[204 171 152]
342	16987	r1BIp	periventricular stratum of r1BI	10	15564	[241 18 46]
343	16990	r1BIi	intermediate stratum of r1BI	10	15564	[ 47 136 63]
344	16993	r1BIs	superficial stratum of r1BI	10	15564	[181 17 223]
345	16995	r1BMv	ventricular zone of r1BM	9	15564	[133 142 168]
346	16997	r1BMp	periventricular stratum of r1BM	10	15564	[54 88 51]
347	17004	r1BMi	intermediate stratum of r1BM	10	15564	[ 87 244 246]
348	17013	r1BMs	superficial stratum of r1BM	10	15564	[161 251 227]
349	17024	r2R	r2 roof plate	5	15564	[86 99 94]
350	17025	r2A	r2 alar plate	5	15564	[252 233 38]
351	17027	r2Cov	ventricular zone of r2Co	9	15564	[230 141 59]
352	17032	r2Vev	ventricular zone of r2Ve	9	15564	[167 39 73]
353	17043	r2Limv	ventricular zone of r2Lim	9	15564	[61 66 57]
354	17063	r2BLs	superficial stratum of r2BL	10	15564	[35 34 42]
355	17069	r2BIp	periventricular stratum of r2BI	10	15564	[ 83 72 193]
356	17074	r2BIi	intermediate stratum of r2BI	10	15564	[140 241 107]
357	17078	r2BIs	superficial stratum of r2BI	10	15564	[110 130 130]
358	17080	r2BMv	ventricular zone of r2BM	9	15564	[122 239 226]
359	17082	r2BMp	periventricular stratum of r2BM	10	15564	[129 66 107]
360	17085	r2BMi	intermediate stratum of r2BM	10	15564	[ 79 35 232]
361	17089	r2BMs	superficial stratum of r2BM	10	15564	[160 204 214]
362	17094	r3R	r3 roof plate	5	15564	[225 234 76]
363	17095	r3A	r3 alar plate	5	15564	[139 141 239]
364	17097	r3Cov	ventricular zone of r3Co	9	15564	[250 231 122]
365	17102	r3Vev	ventricular zone of r3Ve	9	15564	[198 176 88]
366	17114	r3Limv	ventricular zone of r3Lim	9	15564	[174 216 13]
367	17123	r3B	r3 basal plate	5	15564	[118 230 88]
368	17131	r3BLs	superficial stratum of r3BL	10	15564	[136 44 184]
369	17133	r3BIv	ventricular zone of r3BI	9	15564	[24 81 30]
370	17135	r3BIp	periventricular stratum of r3BI	10	15564	[173 246 140]
371	17139	r3BIi	intermediate stratum of r3BI	10	15564	[101 153 102]
372	17141	r3BIs	superficial stratum of r3BI	10	15564	[ 98 230 250]
373	17144	r3BMv	ventricular zone of r3BM	9	15564	[57 37 31]
374	17146	r3BMp	periventricular stratum of r3BM	10	15564	[119 215 64]
375	17148	r3BMi	intermediate stratum of r3BM	10	15564	[237 173 205]
376	17153	r3BMs	superficial stratum of r3BM	10	15564	[250 154 21]
377	17157	r4R	r4 roof plate	5	15564	[109 157 199]
378	17158	r4A	r4 alar plate	5	15564	[183 203 87]
379	17160	r4Cov	ventricular zone of r4Co	9	15564	[169 225 146]
380	17165	r4Vev	ventricular zone of r4Ve	9	15564	[198 232 46]
381	17182	r4B	r4 basal plate	5	15564	[114 236 35]
382	17197	r4BIv	ventricular zone of r4BI	9	15564	[224 28 130]
383	17199	r4BIp	periventricular stratum of r4BI	10	15564	[190 232 205]
384	17203	r4BIi	intermediate stratum of r4BI	10	15564	[132 181 43]
385	17205	r4BIs	superficial stratum of r4BI	10	15564	[127 83 221]
386	17208	r4BMv	ventricular zone of r4BM	9	15564	[ 95 217 207]
387	17210	r4BMp	periventricular stratum of r4BM	10	15564	[217 111 41]
388	17212	r4BMi	intermediate stratum of r4BM	10	15564	[ 24 95 235]
389	17217	r4BMs	superficial stratum of r4BM	10	15564	[166 178 20]
390	17222	r5R	r5 roof plate	5	15564	[143 93 41]
391	17225	r5Cov	ventricular zone of r5Co	9	15564	[154 116 154]
392	17230	r5Vev	ventricular zone of r5Ve	9	15564	[87 90 22]
393	17236	r5Trv	ventricular zone of r5Tr	9	15564	[ 73 191 163]
394	17243	r5Limv	ventricular zone of r5Lim	9	15564	[198 219 186]
395	17250	r5B	r5 basal plate	5	15564	[230 153 154]
396	17258	r5BLs	superficial stratum of r5BL	10	15564	[254 42 191]
397	17267	r5BIv	ventricular zone of r5BI	9	15564	[101 58 54]
398	17269	r5BIp	periventricular stratum of r5BI	10	15564	[120 184 234]
399	17271	r5BIi	intermediate stratum of r5BI	10	15564	[235 110 84]
400	17273	r5BIs	superficial stratum of r5BI	10	15564	[252 58 170]
401	17276	r5BMv	ventricular zone of r5BM	9	15564	[169 212 177]
402	17278	r5BMp	periventricular stratum of r5BM	10	15564	[164 106 154]
403	17280	r5BMi	intermediate stratum of r5BM	10	15564	[237 23 54]
404	17286	r5BMs	superficial stratum of r5BM	10	15564	[ 90 94 134]
405	17291	r6R	r6 roof plate	5	15564	[189 228 252]
406	17292	r6A	r6 alar plate	5	15564	[217 200 85]
407	17294	r6Cov	ventricular zone of r6Co	9	15564	[20 15 77]
408	17299	r6Vev	ventricular zone of r6Ve	9	15564	[166 34 174]
409	17305	r6Trv	ventricular zone of r6Tr	9	15564	[ 87 111 137]
410	17312	r6Limv	ventricular zone of r6Lim	9	15564	[205 245 205]
411	17318	r6B	r6 basal plate	5	15564	[207 26 67]
412	17326	r6BLs	superficial stratum of r6BL	10	15564	[ 58 139 174]
413	17329	r6BIv	ventricular zone of r6BI	9	15564	[245 68 196]
414	17331	r6BIp	periventricular stratum of r6BI	10	15564	[147 192 156]
415	17333	r6BIi	intermediate stratum of r6BI	10	15564	[146 112 172]
416	17335	r6BIs	superficial stratum of r6BI	10	15564	[ 32 50 218]
417	17339	r6BMv	ventricular zone of r6BM	9	15564	[ 78 102 236]
418	17341	r6BMp	periventricular stratum of r6BM	10	15564	[160 64 20]
419	17343	r6BMi	intermediate stratum of r6BM	10	15564	[174 212 218]
420	17348	r6BMs	superficial stratum of r6BM	10	15564	[69 93 89]
421	17354	r7R	r7 roof plate	5	15564	[198 136 250]
422	17355	r7A	r7 alar plate	5	15564	[230 38 49]
423	17362	r7Vev	ventricular zone of r7Ve	9	15564	[ 57 148 112]
424	17367	r7Trv	ventricular zone of r7Tr	9	15564	[230 198 218]
425	17374	r7Limv	ventricular zone of r7Lim	9	15564	[135 136 111]
426	17380	r7B	r7 basal plate	5	15564	[ 85 241 82]
427	17386	r7BLi	intermediate stratum of r7BL	10	15564	[ 10 217 47]
428	17388	r7BLs	superficial stratum of r7BL	10	15564	[ 72 226 60]
429	17393	r7BIp	periventricular stratum of r7BI	10	15564	[207 237 38]
430	17395	r7BIi	intermediate stratum of r7BI	10	15564	[192 58 80]
431	17397	r7BIs	superficial stratum of r7BI	10	15564	[ 52 127 57]
432	17401	r7BMv	ventricular zone of r7BM	9	15564	[114 25 105]
433	17403	r7BMp	periventricular stratum of r7BM	10	15564	[130 212 210]
434	17407	r7BMi	intermediate stratum of r7BM	10	15564	[157 214 68]
435	17412	r7BMs	superficial stratum of r7BM	10	15564	[228 207 36]
436	17417	r8R	r8 roof plate	5	15564	[ 56 76 160]
437	17418	r8A	r8 alar plate	5	15564	[182 96 47]
438	17420	r8Vev	ventricular zone of r8Ve	9	15564	[226 244 60]
439	17425	r8Trv	ventricular zone of r8Tr	9	15564	[ 76 227 50]
440	17432	r8Limv	ventricular zone of r8Lim	9	15564	[ 30 248 181]
441	17441	r8BLp	periventricular stratum of r8BL	10	15564	[148 126 162]
442	17443	r8BLi	intermediate stratum of r8BL	10	15564	[124 196 53]
443	17445	r8BLs	superficial stratum of r8BL	10	15564	[115 88 44]
444	17450	r8BIv	ventricular zone of r8BI	9	15564	[199 143 249]
445	17452	r8BIp	periventricular stratum of r8BI	10	15564	[197 75 100]
446	17455	r8BIi	intermediate stratum of r8BI	10	15564	[203 45 215]
447	17457	r8BIs	superficial stratum of r8BI	10	15564	[ 24 208 163]
448	17461	r8BMv	ventricular zone of r8BM	9	15564	[193 147 214]
449	17463	r8BMp	periventricular stratum of r8BM	10	15564	[144 81 247]
450	17467	r8BMi	intermediate stratum of r8BM	10	15564	[ 20 89 133]
451	17472	r8BMs	superficial stratum of r8BM	10	15564	[147 224 182]
452	17477	r9R	r9 roof plate	5	15564	[244 244 211]
453	17478	r9A	r9 alar plate	5	15564	[129 20 158]
454	17480	r9Vev	ventricular zone of r9Ve	9	15564	[210 93 47]
455	17486	r9Trv	ventricular zone of r9Tr	9	15564	[192 246 224]
456	17495	r9Limv	ventricular zone of r9Lim	9	15564	[ 54 128 86]
457	17500	r9B	r9 basal plate	5	15564	[ 83 221 216]
458	17504	r9BLp	periventricular stratum of r9BL	10	15564	[156 115 232]
459	17506	r9BLi	intermediate stratum of r9BL	10	15564	[180 247 52]
460	17508	r9BLs	superficial stratum of r9BL	10	15564	[179 200 130]
461	17513	r9BIv	ventricular zone of r9BI	9	15564	[ 62 126 58]
462	17515	r9BIp	periventricular stratum of r9BI	10	15564	[ 79 118 237]
463	17518	r9BIi	intermediate stratum of r9BI	10	15564	[108 160 241]
464	17520	r9BIs	superficial stratum of r9BI	10	15564	[234 29 127]
465	17524	r9BMv	ventricular zone of r9BM	9	15564	[ 97 95 121]
466	17526	r9BMp	periventricular stratum of r9BM	10	15564	[243 137 223]
467	17529	r9BMi	intermediate stratum of r9BM	10	15564	[ 95 90 111]
468	17534	r9BMs	superficial stratum of r9BM	10	15564	[ 31 45 157]
469	17539	r10R	r10 roof plate	5	15564	[215 90 35]
470	17540	r10A	r10 alar plate	5	15564	[239 38 44]
471	17542	r10Vev	ventricular zone of r10Ve	9	15564	[ 72 173 210]
472	17548	r10Trv	ventricular zone of r10Tr	9	15564	[244 183 37]
473	17557	r10Limv	ventricular zone of r10Lim	9	15564	[185 206 16]
474	17562	r10B	r10 basal plate	5	15564	[212 192 135]
475	17568	r10BLi	intermediate stratum of r10BL	10	15564	[144 182 236]
476	17570	r10BLs	superficial stratum of r10BL	10	15564	[227 181 26]
477	17572	r10BIv	ventricular zone of r10BI	9	15564	[ 80 125 97]
478	17574	r10BIp	periventricular stratum of r10BI	10	15564	[151 177 75]
479	17577	r10BIi	intermediate stratum of r10BI	10	15564	[ 38 151 55]
480	17580	r10BIs	superficial stratum of r10BI	10	15564	[237 141 32]
481	17582	r10BMv	ventricular zone of r10BM	9	15564	[250 119 20]
482	17584	r10BMp	periventricular stratum of r10BM	10	15564	[103 226 46]
483	17587	r10BMi	intermediate stratum of r10BM	10	15564	[ 13 122 167]
484	17592	r10BMs	superficial stratum of r10BM	10	15564	[160 241 49]
485	17597	r11R	r11 roof plate	5	15564	[159 55 17]
486	17598	r11A	r11 alar plate	5	15564	[140 240 167]
487	17604	r11Trv	ventricular zone of r11Tr	9	15564	[130 152 63]
488	17613	r11Limv	ventricular zone of r11Lim	9	15564	[196 254 82]
489	17620	r11B	r11 basal plate	5	15564	[ 40 246 201]
490	17626	r11BLi	intermediate stratum of r11BL	10	15564	[145 111 74]
491	17628	r11BLs	superficial stratum of r11BL	10	15564	[246 84 240]
492	17632	r11BIp	periventricular stratum of r11BI	10	15564	[122 41 17]
493	17635	r11BIi	intermediate stratum of r11BI	10	15564	[ 37 186 181]
494	17637	r11BIs	superficial stratum of r11BI	10	15564	[240 186 83]
495	17639	r11BMv	ventricular zone of r11BM	9	15564	[189 93 102]
496	17641	r11BMp	periventricular stratum of r11BM	10	15564	[161 230 52]
497	17643	r11BMi	intermediate stratum of r11BM	10	15564	[ 16 171 111]
498	17648	r11BMs	superficial stratum of r11BM	10	15564	[186 127 167]
499	17652	SpR	SpC roof plate	5	15564	[208 126 138]
500	17653	SpA	SpC alar plate	5	15564	[158 133 151]
501	17667	SpALv	ventricular zone of the SpAL	9	15564	[ 78 112 114]
502	17670	SpALp	periventricular stratum of the SpAL	10	15564	[42 19 25]
503	17671	SpALi	intermediate stratum of the SpAL	10	15564	[123 187 126]
504	17674	SpALs	superficial stratum of the SpAL	10	15564	[28 54 92]
505	17678	SpAVv	ventricular zone of the SpAV	9	15564	[218 95 75]
506	17680	SpAVp	periventricular stratum of the SpAV	10	15564	[211 103 150]
507	17682	SpAVi	intermediate stratum of the SpAV	10	15564	[ 10 45 200]
508	17689	SpAVs	superficial stratum of the SpAV	10	15564	[198 141 249]
509	17692	SpB	SpC basal plate (anterior horn)	5	15564	[157 39 110]
510	17694	SpBLv	ventricular zone of SpBL	9	15564	[ 68 241 178]
511	17696	SpBLp	periventricular stratum of SpBL	10	15564	[198 30 248]
512	17698	SpBLi	intermediate stratum of SpBL	10	15564	[238 71 195]
513	17709	SpBLs	superficial stratum of SpBL	10	15564	[ 72 193 140]
514	17711	SpBIv	ventricular zone of SpBI	9	15564	[106 162 149]
515	17713	SpBIp	periventricular stratum of SpBI	10	15564	[216 131 106]
516	17715	SpBIi	intermediate stratum of SpBI	10	15564	[207 184 110]
517	17724	SpBIs	superficial stratum of SpBI	10	15564	[172 50 16]
518	17726	SpBMv	ventricular zone of SpBM	9	15564	[155 129 179]
519	17728	SpBMp	periventricular stratum of SpBM	10	15564	[129 42 218]
520	17730	SpBMi	intermediate stratum of SpBM	10	15564	[191 182 247]
521	17733	SpBMs	superficial stratum of SpBM	10	15564	[182 99 106]
522	17734	SpF	SpC floor plate	5	15564	[ 94 242 81]
523	111220552	DPallv	ventricular zone of DPall	9	15564	[152 116 125]
524	111220556	DPallp	periventricular stratum of DPall	10	15564	[105 114 159]
525	111220558	DPalli	intermediate stratum of DPall	10	15564	[248 176 191]
526	111220560	DPalls	superficial stratum of DPall	10	15564	[111 97 31]
527	111220562	MPallv	ventricular zone of MPall	9	15564	[ 68 54 194]
528	111220566	MPallp	periventricular stratum of MPall	10	15564	[173 211 66]
529	111220568	MPalli	intermediate stratum of MPall	10	15564	[183 106 17]
530	111220570	MPalls	superficial stratum of MPall	10	15564	[232 110 91]
531	111220576	p3Chv	ventricular zone of p3Ch	9	15564	[167 99 34]
532	111220584	p2Chv	ventricular zone of p2Ch	9	15564	[183 235 63]
533	111220588	p2ALv	ventricular zone of p2AL	9	15564	[187 59 53]
534	111220612	isADLv	ventricular zone of isADL	9	15564	[210 142 21]
535	111220616	isBv	ventricular zone of isB	9	15564	[177 141 150]
536	111220624	r1Vep	periventricular stratum of r1Ve	10	15564	[217 147 184]
537	111220626	r1Vei	intermediate stratum of r1Ve	10	15564	[114 225 11]
538	111220628	r1Ves	superficial stratum of r1Ve	10	15564	[154 86 111]
539	111220630	r1Trp	periventricular stratum of r1Tr	10	15564	[ 88 188 149]
540	111220632	r1Tri	intermediate stratum of r1Tr	10	15564	[213 216 111]
541	111220634	r1Trs	superficial stratum of r1Tr	10	15564	[236 172 29]
542	111220636	r1Limp	periventricular stratum of r1Lim	10	15564	[ 97 251 13]
543	111220638	r1Limi	intermediate stratum of r1Lim	10	15564	[187 80 248]
544	111220640	r1Lims	superficial stratum of r1Lim	10	15564	[234 14 149]
545	111220642	r1Bv	ventricular zone of r1B	9	15564	[218 165 142]
546	111220650	r2Cop	periventricular stratum of r2Co	10	15564	[142 164 244]
547	111220652	r2Coi	intermediate stratum of r2Co	10	15564	[247 245 169]
548	111220654	r2Cos	superficial stratum of r2Co	10	15564	[124 228 16]
549	111220656	r2Vep	periventricular stratum of r2Ve	10	15564	[ 35 195 93]
550	111220658	r2Vei	intermediate stratum of r2Ve	10	15564	[157 165 140]
551	111220660	r2Ves	superficial stratum of r2Ve	10	15564	[240 151 160]
552	111220664	r2Tri	intermediate stratum of r2Tr	10	15564	[243 139 206]
553	111220666	r2Trs	superficial stratum of r2Tr	10	15564	[113 114 75]
554	111220668	r2Limp	periventricular stratum of r2Lim	10	15564	[162 117 12]
555	111220670	r2Limi	intermediate stratum of r2Lim	10	15564	[245 63 20]
556	111220672	r2Lims	superficial stratum of r2Lim	10	15564	[243 233 153]
557	111220674	r2Bv	ventricular zone of r2B	9	15564	[ 90 229 130]
558	111220682	r3Cop	periventricular stratum of r3Co	10	15564	[70 77 63]
559	111220684	r3Coi	intermediate stratum of r3Co	10	15564	[234 173 27]
560	111220686	r3Cos	superficial stratum of r3Co	10	15564	[ 77 98 200]
561	111220688	r3Vep	periventricular stratum of r3Ve	10	15564	[104 178 253]
562	111220690	r3Vei	intermediate stratum of r3Ve	10	15564	[165 29 89]
563	111220692	r3Ves	superficial stratum of r3Ve	10	15564	[ 59 216 180]
564	111220696	r3Tri	intermediate stratum of r3Tr	10	15564	[139 142 184]
565	111220698	r3Trs	superficial stratum of r3Tr	10	15564	[ 42 199 109]
566	111220700	r3Limp	periventricular stratum of r3Lim	10	15564	[ 79 117 91]
567	111220702	r3Limi	intermediate stratum of r3Lim	10	15564	[229 53 78]
568	111220704	r3Lims	superficial stratum of r3Lim	10	15564	[121 119 211]
569	111220706	r3Bv	ventricular zone of r3B	9	15564	[127 178 206]
570	111220714	r4Cop	periventricular stratum of r4Co	10	15564	[ 82 166 153]
571	111220716	r4Coi	intermediate stratum of r4Co	10	15564	[ 22 232 140]
572	111220718	r4Cos	superficial stratum of r4Co	10	15564	[ 94 187 129]
573	111220720	r4Vep	periventricular stratum of r4Ve	10	15564	[113 90 211]
574	111220722	r4Vei	intermediate stratum of r4Ve	10	15564	[177 207 174]
575	111220724	r4Ves	superficial stratum of r4Ve	10	15564	[ 40 152 229]
576	111220728	r4Tri	intermediate stratum of r4Tr	10	15564	[233 133 162]
577	111220730	r4Trs	superficial stratum of r4Tr	10	15564	[148 32 250]
578	111220734	r4Limi	intermediate stratum of r4Lim	10	15564	[184 133 127]
579	111220736	r4Lims	superficial stratum of r4Lim	10	15564	[186 37 252]
580	111220746	r5Cop	periventricular stratum of r5Co	10	15564	[140 114 127]
581	111220748	r5Coi	intermediate stratum of r5Co	10	15564	[225 77 132]
582	111220750	r5Cos	superficial stratum of r5Co	10	15564	[ 92 56 252]
583	111220752	r5Vep	periventricular stratum of r5Ve	10	15564	[189 34 99]
584	111220754	r5Vei	intermediate stratum of r5Ve	10	15564	[ 30 50 163]
585	111220756	r5Ves	superficial stratum of r5Ve	10	15564	[215 239 44]
586	111220760	r5Tri	intermediate stratum of r5Tr	10	15564	[114 15 27]
587	111220762	r5Trs	superficial stratum of r5Tr	10	15564	[127 71 224]
588	111220764	r5Limp	periventricular stratum of r5Lim	10	15564	[236 248 120]
589	111220766	r5Limi	intermediate stratum of r5Lim	10	15564	[ 81 200 76]
590	111220768	r5Lims	superficial stratum of r5Lim	10	15564	[127 150 254]
591	111220778	r6Cop	periventricular stratum of r6Co	10	15564	[ 96 117 98]
592	111220780	r6Coi	intermediate stratum of r6Co	10	15564	[ 98 227 83]
593	111220784	r6Vep	periventricular stratum of r6Ve	10	15564	[241 188 136]
594	111220786	r6Vei	intermediate stratum of r6Ve	10	15564	[ 40 123 60]
595	111220788	r6Ves	superficial stratum of r6Ve	10	15564	[ 70 98 103]
596	111220790	r6Trp	periventricular stratum of r6Tr	10	15564	[ 74 125 208]
597	111220792	r6Tri	intermediate stratum of r6Tr	10	15564	[193 80 131]
598	111220794	r6Trs	superficial stratum of r6Tr	10	15564	[ 56 116 190]
599	111220796	r6Limp	periventricular stratum of r6Lim	10	15564	[227 213 17]
600	111220798	r6Limi	intermediate stratum of r6Lim	10	15564	[159 245 15]
601	111220800	r6Lims	superficial stratum of r6Lim	10	15564	[ 60 36 153]
602	111220816	r7Vep	periventricular stratum of r7Ve	10	15564	[199 17 109]
603	111220818	r7Vei	intermediate stratum of r7Ve	10	15564	[70 90 62]
604	111220820	r7Ves	superficial stratum of r7Ve	10	15564	[ 77 245 96]
605	111220822	r7Trp	periventricular stratum of r7Tr	10	15564	[ 54 197 25]
606	111220824	r7Tri	intermediate stratum of r7Tr	10	15564	[ 11 208 242]
607	111220826	r7Trs	superficial stratum of r7Tr	10	15564	[238 199 97]
608	111220828	r7Limp	periventricular stratum of r7Lim	10	15564	[ 82 110 52]
609	111220830	r7Limi	intermediate stratum of r7Lim	10	15564	[ 17 128 177]
610	111220832	r7Lims	superficial stratum of r7Lim	10	15564	[ 46 194 186]
611	111220842	r8Vep	periventricular stratum of r8Ve	10	15564	[153 51 157]
612	111220844	r8Vei	intermediate stratum of r8Ve	10	15564	[222 86 151]
613	111220846	r8Ves	superficial stratum of r8Ve	10	15564	[224 72 29]
614	111220848	r8Trp	periventricular stratum of r8Tr	10	15564	[111 154 25]
615	111220850	r8Tri	intermediate stratum of r8Tr	10	15564	[225 162 14]
616	111220852	r8Trs	superficial stratum of r8Tr	10	15564	[249 176 49]
617	111220854	r8Limp	periventricular stratum of r8Lim	10	15564	[246 141 16]
618	111220856	r8Limi	intermediate stratum of r8Lim	10	15564	[ 76 54 108]
619	111220858	r8Lims	superficial stratum of r8Lim	10	15564	[ 22 146 135]
620	111220868	r9Vep	periventricular stratum of r9Ve	10	15564	[113 145 191]
621	111220870	r9Vei	intermediate stratum of r9Ve	10	15564	[103 157 180]
622	111220872	r9Ves	superficial stratum of r9Ve	10	15564	[206 102 174]
623	111220874	r9Trp	periventricular stratum of r9Tr	10	15564	[182 187 56]
624	111220876	r9Tri	intermediate stratum of r9Tr	10	15564	[218 67 195]
625	111220878	r9Trs	superficial stratum of r9Tr	10	15564	[244 73 47]
626	111220880	r9Limp	periventricular stratum of r9Lim	10	15564	[ 73 195 189]
627	111220882	r9Limi	intermediate stratum of r9Lim	10	15564	[ 63 221 244]
628	111220884	r9Lims	superficial stratum of r9Lim	10	15564	[169 132 79]
629	111220894	r10Vep	periventricular stratum of r10Ve	10	15564	[ 86 56 230]
630	111220896	r10Vei	intermediate stratum of r10Ve	10	15564	[123 99 240]
631	111220898	r10Ves	superficial stratum of r10Ve	10	15564	[145 36 56]
632	111220900	r10Trp	periventricular stratum of r10Tr	10	15564	[172 152 223]
633	111220902	r10Tri	intermediate stratum of r10Tr	10	15564	[197 123 214]
634	111220904	r10Trs	superficial stratum of r10Tr	10	15564	[177 136 53]
635	111220906	r10Limp	periventricular stratum of r10Lim	10	15564	[ 92 160 225]
636	111220908	r10Limi	intermediate stratum of r10Lim	10	15564	[ 38 210 96]
637	111220910	r10Lims	superficial stratum of r10Lim	10	15564	[226 219 97]
638	111220922	r11Vei	intermediate stratum of r11Ve	10	15564	[251 138 125]
639	111220924	r11Ves	superficial stratum of r11Ve	10	15564	[181 220 70]
640	111220926	r11Trp	periventricular stratum of r11Tr	10	15564	[132 43 31]
641	111220928	r11Tri	intermediate stratum of r11Tr	10	15564	[116 109 121]
642	111220930	r11Trs	superficial stratum of r11Tr	10	15564	[241 44 226]
643	111220932	r11Limp	periventricular stratum of r11Lim	10	15564	[134 79 99]
644	111220934	r11Limi	intermediate stratum of r11Lim	10	15564	[114 207 186]
645	111220936	r11Lims	superficial stratum of r11Lim	10	15564	[140 206 89]
646	112892285	m2Rv	ventricular zone of m2R	9	15564	[108 110 55]
647	112892293	m2Rs	superficial stratum of m2R	10	15564	[ 33 227 25]
648	112892299	m2Fv	ventricular zone of m2F	9	15564	[ 79 47 202]
649	112892303	m2Fp	periventricular stratum of m2F	10	15564	[ 45 165 204]
650	112892305	m2Fi	intermediate stratum of m2F	10	15564	[ 32 177 185]
651	112892307	m2Fs	superficial stratum of m2F	10	15564	[134 122 246]
652	112892309	isADLp	periventricular stratum of isADL	10	15564	[146 91 217]
653	112892311	isADLi	intermediate stratum of isADL	10	15564	[ 32 121 223]
654	112892313	isADLs	superficial stratum of isADL	10	15564	[ 13 159 253]
655	112892317	isFp	periventricular stratum of isF	10	15564	[161 234 209]
656	112892319	isFi	intermediate stratum of isF	10	15564	[154 189 217]
657	112892321	isFs	superficial stratum of isF	10	15564	[199 119 171]
658	112892323	r1Fv	ventricular zone of r1F	9	15564	[142 76 110]
659	112892327	r1Fp	periventricular stratum of r1F	10	15564	[178 243 204]
660	112892329	r1Fi	intermediate stratum of r1F	10	15564	[153 133 142]
661	112892331	r1Fs	superficial stratum of r1F	10	15564	[190 73 246]
662	112892333	r2Fv	ventricular zone of r2F	9	15564	[ 26 12 254]
663	112892339	r2Fi	intermediate stratum of r2F	10	15564	[ 86 61 237]
664	112892341	r2Fs	superficial stratum of r2F	10	15564	[133 146 138]
665	112892343	r3Fv	ventricular zone of r3F	9	15564	[112 58 170]
666	112892349	r3Fi	intermediate stratum of r3F	10	15564	[202 111 134]
667	112892351	r3Fs	superficial stratum of r3F	10	15564	[119 246 204]
668	112892353	r4Fv	ventricular zone of r4F	9	15564	[243 105 152]
669	112892357	r4Fp	periventricular stratum of r4F	10	15564	[174 243 80]
670	112892359	r4Fi	intermediate stratum of r4F	10	15564	[234 205 59]
671	112892361	r4Fs	superficial stratum of r4F	10	15564	[192 96 116]
672	112892363	r5Fv	ventricular zone of r5F	9	15564	[124 194 11]
673	112892367	r5Fp	periventricular stratum of r5F	10	15564	[ 92 159 200]
674	112892369	r5Fi	intermediate stratum of r5F	10	15564	[ 48 172 190]
675	112892371	r5Fs	superficial stratum of r5F	10	15564	[250 132 43]
676	112892379	r6Fi	intermediate stratum of r6F	10	15564	[157 154 227]
677	112892381	r6Fs	superficial stratum of r6F	10	15564	[41 43 47]
678	112892383	r7Fv	ventricular zone of r7F	9	15564	[155 160 66]
679	112892387	r7Fp	periventricular stratum of r7F	10	15564	[128 121 206]
680	112892389	r7Fi	intermediate stratum of r7F	10	15564	[195 50 140]
681	112892391	r7Fs	superficial stratum of r7F	10	15564	[ 84 123 159]
682	112892395	r8Fv	ventricular zone of r8F	9	15564	[195 29 241]
683	112892399	r8Fp	periventricular stratum of r8F	10	15564	[ 92 60 115]
684	112892401	r8Fi	intermediate stratum of r8F	10	15564	[ 33 85 214]
685	112892403	r8Fs	superficial stratum of r8F	10	15564	[ 60 49 231]
686	112892407	r9Fv	ventricular zone of r9F	9	15564	[ 53 254 85]
687	112892411	r9Fp	periventricular stratum of r9F	10	15564	[123 116 237]
688	112892413	r9Fi	intermediate stratum of r9F	10	15564	[ 32 32 231]
689	112892415	r9Fs	superficial stratum of r9F	10	15564	[ 73 155 141]
690	112892419	r10Fv	ventricular zone of r10F	9	15564	[157 93 108]
691	112892423	r10Fp	periventricular stratum of r10F	10	15564	[ 81 64 225]
692	112892425	r10Fi	intermediate stratum of r10F	10	15564	[ 78 104 122]
693	112892427	r10Fs	superficial stratum of r10F	10	15564	[198 90 37]
694	112892429	r11Fv	ventricular zone of r11F	9	15564	[ 40 97 226]
695	112892433	r11Fp	periventricular stratum of r11F	10	15564	[164 136 43]
696	112892435	r11Fi	intermediate stratum of r11F	10	15564	[219 32 194]
697	112892437	r11Fs	superficial stratum of r11F	10	15564	[222 35 84]
698	112892439	SpFv	ventricular zone of SpF	9	15564	[ 15 189 220]
699	112892443	SpFp	periventricular stratum of SpF	10	15564	[116 78 17]
700	112892445	SpFi	intermediate stratum of SpF	10	15564	[250 222 75]
701	112892447	SpFs	superficial stratum of SpF	10	15564	[100 82 74]
702	114403711	m1Rs	superficial stratum of m1R	10	15564	[251 90 182]
703	114403727	isRs	superficial stratum of isR	10	15564	[ 55 106 145]

## Sheet: ABA-E15pt5
	Region	RegionAbbr	RegionName	Level	Parent	RGB
0	15572	RSComv	ventricular zone of RSCom	9	15564	[113 168 117]
1	15574	RSComm	mantle zone of RSCom	9	15564	[246 103 203]
2	15576	POA	preoptic alar plate	5	15564	[149 236 27]
3	15588	PO1v	ventricular zone of PO1	9	15564	[ 14 213 200]
4	15590	PO1p	periventricular stratum of PO1	10	15564	[249 205 123]
5	15593	PO1i	intermediate stratum of PO1	10	15564	[ 38 166 45]
6	15597	PO1s	superficial stratum of PO1	10	15564	[137 111 117]
7	15600	PO2v	ventricular zone of PO2	9	15564	[121 149 22]
8	15602	PO2p	periventricular stratum of PO2	10	15564	[159 161 241]
9	15608	PO2i	intermediate stratum of PO2	10	15564	[ 98 117 180]
10	15610	PO2s	superficial stratum of PO2	10	15564	[173 174 61]
11	15614	POHv	ventricular zone of POH	9	15564	[138 99 149]
12	15616	POHp	periventricular stratum of POH	10	15564	[252 35 61]
13	15617	POHi	intermediate stratum of POH	10	15564	[170 72 124]
14	15620	POHs	superficial stratum of POH	10	15564	[ 48 37 170]
15	15623	THyA	alar part of terminal hypothalamus	5	15564	[ 58 100 211]
16	15625	TPaAv	ventricular zone of TPaA	9	15564	[215 33 249]
17	15627	TPaAp	periventricular stratum of TPaA	10	15564	[249 158 191]
18	15629	TPaAi	intermediate stratum of TPaA	10	15564	[79 62 82]
19	15632	TPaAs	superficial stratum of TPaA	10	15564	[ 87 111 39]
20	15654	TSPaAv	ventricular zone of TSPaA	9	15564	[148 119 138]
21	15656	TSPaAp	periventricular stratum of TSPaA	10	15564	[151 237 88]
22	15659	TSPaAi	intermediate stratum of TSPaA	10	15564	[ 42 185 80]
23	15663	TSPaAs	superficial stratum of TSPaA	10	15564	[153 14 213]
24	15666	THyB	basal part of terminal hypothalamus	5	15564	[176 76 190]
25	15668	THyB-Dv	ventricular zone of THyB-D	9	15564	[111 151 155]
26	15670	THyB-Dp	periventricular stratum of THyB-D	10	15564	[ 64 243 119]
27	15673	THyB-Di	intermediate stratum of THyB-D	10	15564	[181 82 209]
28	15680	THyB-Ds	superficial stratum of THyB-D	10	15564	[225 152 226]
29	15685	THyB-Iv	ventricular zone of THyB-I	9	15564	[187 132 244]
30	15686	THyB-Im	mantle zone of THyB-I	9	15564	[113 158 22]
31	15687	THyB-Ip	periventricular stratum of THyB-I	10	15564	[171 81 161]
32	15693	THyB-Ii	intermediate stratum of THyB-I	10	15564	[ 68 83 149]
33	15699	THyB-Is	superficial stratum of THyB-I	10	15564	[150 170 169]
34	15703	THyB-Vv	ventricular zone of THyB-V	9	15564	[229 100 116]
35	15705	THyB-Vm	mantle zone of THyB-V	9	15564	[207 182 34]
36	15706	THyB-Vp	periventricular stratum of THyB-V	10	15564	[184 254 46]
37	15708	THyB-Vi	intermediate stratum of THyB-V	10	15564	[ 49 160 40]
38	15710	THyB-Vs	superficial stratum of THyB-V	10	15564	[207 149 109]
39	15713	THyB-Pv	ventricular zone of THyB-P	9	15564	[180 121 186]
40	15715	THyB-Pm	mantle zone of THyB-P	9	15564	[249 219 12]
41	15716	THyB-Pp	periventricular stratum of THyB-P	10	15564	[188 52 137]
42	15718	THyB-Pi	intermediate stratum of THyB-P	10	15564	[ 58 14 204]
43	15720	THyB-Ps	superficial stratum of THyB-P	10	15564	[ 94 237 182]
44	15724	Mamv	ventricular zone of Mam	9	15564	[ 50 162 151]
45	15725	Mamm	mantle zone of Mam	9	15564	[238 160 141]
46	15736	THyF	floor of terminal hypothalamus	5	15564	[188 86 107]
47	15740	TelR	roof plate of evaginated telencephalic vesicle	5	15564	[ 55 241 191]
48	15742	CSComv	ventricular zone of CSCom	9	15564	[65 72 38]
49	15744	CSComm	mantle zone of CSCom	9	15564	[ 86 180 102]
50	15748	CSComs	superficial stratum of CSCom	10	15564	[ 16 26 176]
51	15750	TelA	alar plate of evaginated telencephalic vesicle	5	15564	[141 229 252]
52	15754	DgSev	ventricular zone of DgSe	9	15564	[172 74 15]
53	15756	DgSep	periventricular stratum of DgSe	10	15564	[140 103 154]
54	15759	DgSei	intermediate stratum of DgSe	10	15564	[164 223 77]
55	15762	DgSes	superficial stratum of DgSe	10	15564	[ 55 243 178]
56	15766	PalSev	ventricular zone of PalSe	9	15564	[242 189 72]
57	15768	PalSep	periventricular stratum of PalSe	10	15564	[136 25 60]
58	15770	PalSei	intermediate stratum of PalSe	10	15564	[101 123 124]
59	15773	PalSes	superficial stratum of PalSe	10	15564	[221 38 136]
60	15775	StrSev	ventricular zone of StrSe	9	15564	[185 107 148]
61	15777	StrSep	periventricular part of StrSe	10	15564	[ 71 129 97]
62	15781	StrSei	intermediate part of StrSe	10	15564	[197 193 231]
63	15783	StrSes	superficial part of StrSe	10	15564	[145 153 245]
64	15788	SeDgp	periventricular stratum of SeDg	10	15564	[69 34 22]
65	15792	SeDgi	intermediate stratum of SeDg	10	15564	[174 202 79]
66	15795	SeDgs	superficial stratum of SeDg	10	15564	[ 25 128 249]
67	15798	SePalv	ventricular zone of SePal	9	15564	[ 92 245 66]
68	15800	SePalp	periventricular stratum of SePal	10	15564	[240 205 164]
69	15803	SePali	intermediate stratum of SePal	10	15564	[ 81 217 161]
70	15806	SePals	superficial stratum of SePal	10	15564	[ 95 46 250]
71	15810	SeStrv	ventricular zone of SeStr	9	15564	[131 166 100]
72	15812	SeStrp	periventricular stratum of SeStr	10	15564	[211 56 135]
73	15814	SeStri	intermediate stratum of SeStr	10	15564	[ 33 221 248]
74	15816	SeStrs	superficial stratum of SeStr	10	15564	[232 199 91]
75	15820	Dgv	ventricular zone of Dg	9	15564	[109 66 66]
76	15822	Dgp	periventricular stratum of Dg	10	15564	[187 12 198]
77	15828	Dgi	intermediate stratum of Dg	10	15564	[ 29 31 174]
78	15831	Dgs	superficial stratum of Dg	10	15564	[113 146 220]
79	15835	Palv	ventricular zone of Pal	9	15564	[76 42 36]
80	15837	Palp	periventricular stratum of Pal	10	15564	[ 74 121 177]
81	15842	Pali	intermediate stratum of Pal	10	15564	[ 79 103 86]
82	15845	Pals	superficial stratum of Pal	10	15564	[ 23 180 200]
83	15852	Strv	ventricular zone of Str	9	15564	[116 101 153]
84	15854	Strp	periventricular stratum of Str	10	15564	[100 92 122]
85	15856	Stri	intermediate stratum of Str	10	15564	[205 28 137]
86	15861	Strs	superficial stratum of Str	10	15564	[151 245 168]
87	15869	AStrv	ventricular zone of AStr	9	15564	[183 134 141]
88	15871	AStrp	periventricular stratum of AStr	10	15564	[ 78 65 106]
89	15873	AStri	intermediate stratum of AStr	10	15564	[ 55 231 143]
90	15877	AStrs	superficial stratum of AStr	10	15564	[226 122 187]
91	15879	APalv	ventricular zone of APal	9	15564	[231 179 181]
92	15881	APalp	periventricular stratum of APal	10	15564	[195 165 68]
93	15883	APali	intermediate stratum of APal	10	15564	[205 244 122]
94	15885	APals	superficial stratum of APal	10	15564	[220 122 243]
95	15906	OBv	ventricular zone of OB	9	15564	[211 232 209]
96	15908	OBp	periventricular stratum of OB	10	15564	[164 107 25]
97	15911	OBi	intermediate stratum of OB	10	15564	[ 73 218 18]
98	15914	OBs	superficial stratum of OB	10	15564	[97 97 22]
99	15918	AOVv	ventricular zone of AOV	9	15564	[108 237 34]
100	15920	AOVp	periventricular stratum of AOV	10	15564	[223 121 90]
101	15921	AOVi	intermediate stratum of AOV	10	15564	[160 18 13]
102	15922	AOVs	superficial stratum of AOV	10	15564	[41 71 64]
103	15929	VPrPv	ventricular zone of VPrP	9	15564	[42 19 38]
104	15931	VPrPp	periventricular stratum of VPrP	10	15564	[248 252 110]
105	15932	VPrPi	intermediate stratum of VPrP	10	15564	[166 130 252]
106	15936	VPrPs	superficial stratum of VPrP	10	15564	[201 80 69]
107	15941	VAPv	ventricular zone of the VAP	9	15564	[ 70 173 136]
108	15943	VAPp	periventricular stratum of the VAP	10	15564	[145 80 183]
109	15946	VAPi	intermediate stratum of the VAP	10	15564	[ 98 213 236]
110	15949	VAPs	superficial stratum of the VAP	10	15564	[ 66 95 209]
111	15958	AOBv	ventricular zone of AOB	9	15564	[247 231 82]
112	15960	AOBp	periventricular stratum of AOB	10	15564	[ 71 35 242]
113	15963	AOBi	intermediate stratum of AOB	10	15564	[178 24 189]
114	15966	AOBs	superficial stratum of AOB	10	15564	[121 102 101]
115	15970	AODv	ventricular zone of AOD	9	15564	[ 68 82 120]
116	15972	AODp	periventricular stratum of AOD	10	15564	[215 68 133]
117	15973	AODi	intermediate stratum of AOD	10	15564	[165 222 240]
118	15974	AODs	superficial stratum of AOD	10	15564	[181 247 253]
119	15980	LPrPv	ventricular zone of LPrP	9	15564	[43 81 47]
120	15982	LPrPp	periventricular stratum of LPrP	10	15564	[ 66 158 103]
121	15983	LPrPi	intermediate stratum of LPrP	10	15564	[247 143 77]
122	15985	LPrPs	superficial stratum of LPrP	10	15564	[229 109 145]
123	15990	LAPv	ventricular zone of LAP	9	15564	[121 108 111]
124	15992	LAPp	periventricular stratum of LAP	10	15564	[137 101 138]
125	15993	LAPi	intermediate stratum of LAP	10	15564	[ 91 236 221]
126	15997	LAPs	superficial stratum of LAP	10	15564	[ 72 119 55]
127	16116	DGv	ventricular zone of DG	9	15564	[191 176 162]
128	16118	DGp	periventricular stratum of DG	10	15564	[ 60 93 175]
129	16119	DGi	intermediate stratum of DG	10	15564	[143 79 27]
130	16121	DGs	superficial stratum of DG	10	15564	[ 17 101 139]
131	16125	CAv	ventricular zone of CA	9	15564	[ 31 109 23]
132	16127	CAp	periventricular stratum of CA	10	15564	[162 78 61]
133	16128	CAi	intermediate stratum of CA	10	15564	[151 180 174]
134	16130	CAs	superficial stratum of CA	10	15564	[ 10 168 157]
135	16150	IGp	periventricular stratum of the IG	10	15564	[245 14 180]
136	16151	IGi	intermediate stratum of the IG	10	15564	[134 91 203]
137	16152	IGs	superficial stratum of the IG	10	15564	[118 137 180]
138	16157	TTep	periventricular stratum of TTe	10	15564	[ 65 110 162]
139	16159	TTei	intermediate stratum of TTe	10	15564	[161 42 250]
140	16161	TTes	superficial stratum of TTe	10	15564	[133 235 142]
141	16164	Sv	ventricular zone of S	9	15564	[213 247 235]
142	16166	Sp	periventricular stratum of S	10	15564	[ 52 105 243]
143	16167	Si	intermediate stratum of S	10	15564	[ 49 227 119]
144	16169	Ss	superficial stratum of S	10	15564	[ 49 171 117]
145	16199	SePallv	ventricular zone of SePall	9	15564	[180 70 19]
146	16201	SePallp	periventricular stratum of SePall	10	15564	[ 24 232 191]
147	16202	SePalli	intermediate stratum of SePall	10	15564	[174 139 84]
148	16203	SePalls	superficial stratum of SePall	10	15564	[156 125 102]
149	16206	TelHv	ventricular zone of TelH	9	15564	[ 52 90 176]
150	16208	TelHp	periventricular stratum of TelH	10	15564	[158 127 125]
151	16209	TelHi	intermediate stratum of TelH	10	15564	[136 159 121]
152	16210	TelHs	superficial stratum of TelH	10	15564	[247 42 33]
153	16212	PHyA	alar part of peduncular hypothalamus	5	15564	[154 171 107]
154	16214	PPav	ventricular zone of PPaA	9	15564	[ 96 186 166]
155	16216	PPap	periventricular stratum of PPaA	10	15564	[249 227 197]
156	16225	PPai	intermediate stratum of PPaA	10	15564	[92 46 39]
157	16231	PPas	superficial stratum of PPaA	10	15564	[115 137 199]
158	16234	PSPav	ventricular zone of PSPa	9	15564	[ 38 57 154]
159	16236	PSPap	periventricular stratum of PSPa	10	15564	[217 239 250]
160	16239	PSPai	intermediate stratum of PSPa	10	15564	[103 46 177]
161	16244	PSPas	superficial stratum of PSPa	10	15564	[221 33 131]
162	16247	PHyB	basal peduncular hypothalamus	5	15564	[ 69 51 220]
163	16249	PHyB-Dv	ventricular zone of PHyB-D	9	15564	[125 60 121]
164	16251	PHyB-Dp	periventricular stratum of PHyB-D	10	15564	[113 219 38]
165	16253	PHyB-Di	intermediate stratum of PHyB-D	10	15564	[108 107 174]
166	16257	PHyB-Ds	superficial stratum of PHyB-D	10	15564	[184 166 107]
167	16260	PHyB-Iv	ventricular zone of PHyB-I	9	15564	[160 27 211]
168	16262	PHyB-Ip	periventricular stratum of PHyB-I	10	15564	[187 141 37]
169	16264	PHyB-Ii	intermediate stratum of PHyB-I	10	15564	[109 88 27]
170	16270	PHyB-Is	superficial stratum of PHyB-I	10	15564	[ 36 158 182]
171	16275	PHyB-Vv	ventricular zone of PHyB-V	9	15564	[244 35 222]
172	16278	PHyB-Vp	periventricular stratum of PHyB-V	10	15564	[141 173 138]
173	16280	PHyB-Vi	intermediate stratum of PHyB-V	10	15564	[ 56 22 136]
174	16282	PHyB-Vs	superficial stratum of PHyB-V	10	15564	[101 64 46]
175	16287	PHyB-Pm	mantle zone of PHyB-P	9	15564	[64 54 74]
176	16288	PHyB-Pp	periventricular stratum of PHyB-P	10	15564	[ 26 219 49]
177	16290	PHyB-Pi	intermediate stratum of PHyB-P	10	15564	[199 121 47]
178	16292	PHyB-Ps	superficial stratum of PHyB-P	10	15564	[116 139 151]
179	16297	RMam	mantle zone of RMa	9	15564	[194 237 17]
180	16306	PHyF	floor of peduncular hypothalamus	5	15564	[106 225 179]
181	16311	p3R	roof plate of p3	5	15564	[196 99 132]
182	16313	p3A	alar plate of p3 (alar prethalamus)	5	15564	[ 99 116 131]
183	16316	PThEv	ventricular zone of PThE	9	15564	[ 77 138 60]
184	16318	PThEp	periventricular stratum of PThE	10	15564	[ 21 247 10]
185	16319	PThEi	intermediate stratum of PThE	10	15564	[160 29 226]
186	16321	PThEs	superficial stratum of PThE	10	15564	[246 134 83]
187	16324	RtCv	ventricular zone of RtC	9	15564	[238 137 75]
188	16326	RtCp	periventricular stratum of RtC	10	15564	[101 15 70]
189	16328	RtCi	intermediate stratum of RtC	10	15564	[220 122 118]
190	16330	RtCs	superficial stratum of RtC	10	15564	[225 241 253]
191	16334	p3ZLv	ventricular zone of p3ZL	9	15564	[246 204 175]
192	16336	p3ZLp	periventricular stratum of p3ZL	10	15564	[ 63 50 236]
193	16338	p3ZLi	intermediate stratum of p3ZL	10	15564	[121 131 200]
194	16340	p3ZLs	superficial stratum of p3ZL	10	15564	[ 44 114 216]
195	16344	ZICv	ventricular zone of ZIC	9	15564	[55 48 84]
196	16346	ZICp	periventricular stratum of ZIC	10	15564	[114 57 149]
197	16348	ZICi	intermediate stratum of ZIC	10	15564	[156 38 249]
198	16350	ZICs	superficial stratum of ZIC	10	15564	[105 109 71]
199	16353	p3B	basal plate of p3	5	15564	[ 19 166 110]
200	16354	p3Bv	ventricular zone of p3B	9	15564	[208 183 243]
201	16356	p3Bp	periventricular stratum of p3B	10	15564	[229 198 97]
202	16358	p3Bi	intermediate stratum of p3B	10	15564	[ 80 224 37]
203	16364	p3Bs	superficial stratum of p3B	10	15564	[ 54 108 192]
204	16372	p3Fi	intermediate stratum of p3F	10	15564	[129 15 114]
205	16373	p3Fs	superficial stratum of p3F	10	15564	[ 61 238 62]
206	16377	p2R	roof plate of p2 (epithalamic roofplate)	5	15564	[206 48 158]
207	16382	p2A	alar plate of p2 (alar thalamus)	5	15564	[188 166 208]
208	16385	Hbv	ventricular zone of Hb	9	15564	[234 22 81]
209	16387	Hbp	periventricular stratum of Hb	10	15564	[112 52 57]
210	16390	Hbi	intermediate stratum of Hb	10	15564	[125 226 189]
211	16393	Hbs	superficial stratum of Hb	10	15564	[101 136 227]
212	16397	DTThv	ventricular zone of DTTh	9	15564	[ 11 180 235]
213	16399	DTThp	periventricular stratum of DTTh	10	15564	[ 53 128 70]
214	16409	DTThi	intermediate stratum of DTTh	10	15564	[239 236 79]
215	16433	DTThs	superficial stratum of DTTh	10	15564	[157 245 46]
216	16438	ITThv	ventricular zone of ITTh	9	15564	[224 130 230]
217	16440	ITThp	periventricular stratum of ITTh	10	15564	[140 89 138]
218	16443	ITThi	intermediate stratum of ITTh	10	15564	[116 97 234]
219	16450	ITThs	superficial stratum of ITTh	10	15564	[188 81 151]
220	16458	VTThi	intermediate stratum of VTTh	10	15564	[204 94 198]
221	16461	VTThs	superficial stratum of VTTh	10	15564	[ 44 222 118]
222	16468	p2ZLv	ventricular zone of p2ZL	9	15564	[119 149 162]
223	16470	p2ZLp	periventricular stratum of p2ZL	10	15564	[222 163 108]
224	16472	p2ZLi	intermediate stratum of p2ZL	10	15564	[208 95 61]
225	16474	p2ZLs	superficial stratum of p2ZL	10	15564	[224 235 39]
226	16481	p2Limi	intermediate stratum of p2Lim	10	15564	[ 52 38 230]
227	16483	p2Lims	superficial stratum of p2Lim	10	15564	[250 33 221]
228	16487	p2B	basal plate of p2	5	15564	[100 93 195]
229	16488	p2Bv	ventricular zone of p2B	9	15564	[171 136 128]
230	16490	p2Bp	periventricular stratum of p2B	10	15564	[145 212 187]
231	16492	p2Bi	intermediate stratum of p2B	10	15564	[199 63 231]
232	16497	p2Bs	superficial stratum of p2B	10	15564	[ 91 54 126]
233	16506	p2Fi	intermediate stratum of p2F	10	15564	[83 73 90]
234	16507	p2Fs	superficial stratum of p2F	10	15564	[44 65 41]
235	16513	PComv	ventricular zone of PCom	9	15564	[106 86 186]
236	16516	PComp	periventricular zone of PCom	10	15564	[188 209 63]
237	16517	PComi	intermediate zone of PCom	10	15564	[78 81 54]
238	16519	p1A	alar plate of p1	5	15564	[127 137 219]
239	16526	PcPDi	intermediate stratum of PcPD	10	15564	[ 63 162 37]
240	16528	PcPDs	superficial stratum of PCPD	10	15564	[ 88 138 128]
241	16531	PcPLv	ventricular zone of PcPL	9	15564	[ 26 225 190]
242	16533	PcPLp	periventricular stratum of PcPL	10	15564	[240 134 254]
243	16535	PcPLi	intermediate stratum of PcPL	10	15564	[141 129 84]
244	16537	PcPLs	superficial stratum of PcPL	10	15564	[235 207 187]
245	16544	PcPVi	intermediate stratum of PcPV	10	15564	[235 130 224]
246	16546	PcPVs	superficial stratum of PcPV	10	15564	[ 62 198 12]
247	16554	JcPDi	intermediate stratum of JcPD	10	15564	[ 66 134 190]
248	16557	JcPDs	superficial stratum of JcPD	10	15564	[136 239 66]
249	16560	JcPLv	ventricular zone of JcPL	9	15564	[155 19 126]
250	16562	JcPLp	periventricular stratum of JcPL	10	15564	[ 20 225 137]
251	16564	JcPLi	intermediate stratum of JcPL	10	15564	[ 64 243 152]
252	16567	JcPLs	superficial stratum of JcPL	10	15564	[ 80 121 23]
253	16570	JcPVv	ventricular zone of JcPV	9	15564	[129 109 154]
254	16574	JcPVi	intermediate stratum of JcPV	10	15564	[ 67 162 166]
255	16576	JcPVs	superficial stratum of JcPV	10	15564	[200 217 130]
256	16580	CoPDv	ventricular zone of CoPD	9	15564	[253 41 125]
257	16582	CoPDp	periventricular stratum of CoPD	10	15564	[241 246 186]
258	16584	CoPDi	intermediate stratum of CoPD	10	15564	[72 74 65]
259	16588	CoPDs	superficial stratum of CoPD	10	15564	[ 44 87 163]
260	16592	CoPLv	ventricular zone of CoPL	9	15564	[ 15 115 169]
261	16594	CoPLp	periventricular stratum of CoPL	10	15564	[126 247 75]
262	16596	CoPLi	intermediate stratum of CoPL	10	15564	[128 72 211]
263	16600	CoPLs	superficial stratum of CoPL	10	15564	[ 86 203 185]
264	16603	CoPVv	ventricular zone of CoPV	9	15564	[182 112 11]
265	16605	CoPVp	periventricular stratum of CoPV	10	15564	[135 30 35]
266	16607	CoPVi	intermediate stratum of CoPV	10	15564	[220 47 10]
267	16610	CoPVs	superficial stratum of CoPV	10	15564	[ 78 55 179]
268	16614	p1Limv	ventricular zone of p1Lim	9	15564	[ 74 248 166]
269	16616	p1Limp	periventricular stratum of p1Lim	10	15564	[107 199 44]
270	16618	p1Limi	intermediate stratum of p1Lim	10	15564	[220 161 20]
271	16621	p1Lims	superficial stratum of p1Lim	10	15564	[233 138 96]
272	16625	p1Bv	ventricular zone of p1B	9	15564	[194 226 34]
273	16627	p1Bp	periventricular stratum of p1B	10	15564	[ 14 246 160]
274	16631	p1Bi	intermediate stratum of p1B	10	15564	[ 82 237 75]
275	16636	p1Bs	superficial stratum of p1B	10	15564	[251 201 137]
276	16646	p1Fi	intermediate stratum of p1F	10	15564	[125 117 94]
277	16647	p1Fs	superficial stratum of p1F	10	15564	[ 97 79 118]
278	16652	m1R	roof plate of m1	5	15564	[137 18 232]
279	16653	m1Rv	ventricular zone of m1R	9	15564	[145 218 245]
280	16658	m1A	alar plate of m1	5	15564	[164 254 252]
281	16660	m1ADv	ventricular zone of m1AD	9	15564	[ 41 152 15]
282	16662	m1ADp	periventricular stratum of m1AD	10	15564	[244 90 166]
283	16664	m1ADi	intermediate stratum of m1AD	10	15564	[242 188 90]
284	16666	m1ADs	superficial stratum of m1AD	10	15564	[ 57 106 64]
285	16670	TGv	ventricular zone of TG	9	15564	[ 55 107 77]
286	16672	TGp	periventricular stratum of TG	10	15564	[ 95 183 16]
287	16674	TGi	intermediate stratum of TG	10	15564	[ 66 75 206]
288	16676	TGs	superficial stratum of TG	10	15564	[ 87 212 35]
289	16679	SCv	ventricular zone of SC	9	15564	[194 48 114]
290	16681	SCp	periventricular stratum of SC	10	15564	[ 35 22 154]
291	16684	SCi	intermediate stratum of SC	10	15564	[205 236 83]
292	16688	SCs	superficial stratum of SC	10	15564	[129 154 251]
293	16693	ICv	ventricular zone of IC	9	15564	[105 74 241]
294	16695	ICp	periventricular stratum of IC	10	15564	[186 236 172]
295	16697	ICi	intermediate stratum of IC	10	15564	[ 58 100 183]
296	16699	ICs	superficial stratum of IC	10	15564	[237 222 209]
297	16718	m1Limv	ventricular zone of m1Lim	9	15564	[122 100 103]
298	16720	m1Limp	periventricular stratum of m1Lim	10	15564	[173 80 14]
299	16722	m1Limi	intermediate stratum of m1Lim	10	15564	[ 85 240 227]
300	16724	m1Lims	superficial stratum of m1Lim	10	15564	[169 94 144]
301	16726	m1B	basal plate of m1	5	15564	[ 34 206 20]
302	16727	m1Bv	ventricular zone of m1B	9	15564	[207 22 163]
303	16729	m1Bp	periventricular stratum of m1B	10	15564	[ 51 46 199]
304	16732	m1Bi	intermediate stratum of m1B	10	15564	[250 250 253]
305	16738	m1Bs	superficial stratum of m1B	10	15564	[239 69 122]
306	16742	m1F	floor plate of m1	5	15564	[ 59 148 87]
307	16743	m1Fv	ventricular zone of m1F	9	15564	[38 97 17]
308	16745	m1Fp	periventricular stratum of m1F	10	15564	[172 108 31]
309	16747	m1Fi	intermediate stratum of m1F	10	15564	[ 78 51 246]
310	16749	m1Fs	superficial stratum of m1F	10	15564	[207 153 149]
311	16754	m2A	m2 alar plate	5	15564	[248 99 203]
312	16756	m2ADv	ventricular zone of m2AD	9	15564	[106 244 156]
313	16758	m2ADp	periventricular stratum of m2AD	10	15564	[112 201 179]
314	16760	m2ADi	intermediate stratum of m2AD	10	15564	[ 73 195 122]
315	16761	m2ADs	superficial stratum of m2AD	10	15564	[243 249 221]
316	16772	m2ALv	ventricular zone of m2AL	9	15564	[227 166 115]
317	16774	m2ALp	periventricular stratum of m2AL	10	15564	[198 133 202]
318	16776	m2ALi	intermediate stratum of m2AL	10	15564	[204 83 206]
319	16778	m2ALs	superficial stratum of m2AL	10	15564	[125 175 15]
320	16782	m2Limv	ventricular zone of m2Lim	9	15564	[ 81 250 44]
321	16784	m2Limp	periventricular stratum of m2Lim	10	15564	[35 91 88]
322	16786	m2Limi	intermediate stratum of m2Lim	10	15564	[217 103 16]
323	16789	m2Lims	superficial stratum of m2Lim	10	15564	[171 47 254]
324	16791	m2B	m2 basal plate	5	15564	[222 82 116]
325	16792	m2Bv	ventricular zone of m2B	9	15564	[175 239 162]
326	16794	m2Bp	periventricular stratum of m2B	10	15564	[226 198 184]
327	16797	m2Bi	intermediate stratum of m2B	10	15564	[107 51 211]
328	16800	m2Bs	superficial stratum of m2B	10	15564	[226 246 199]
329	16811	isR	isthmic roof plate	5	15564	[160 19 13]
330	16812	isRv	ventricular zone of isR	9	15564	[211 222 245]
331	16813	isA	isthmic alar plate	5	15564	[ 20 233 84]
332	16817	CbVv	ventricular zone of cerebellar vermis	9	15564	[250 108 173]
333	16819	CbVp	periventricular stratum of cerebellar vermis	10	15564	[198 139 68]
334	16821	CbVi	intermediate stratum of cerebellar vermis	10	15564	[ 73 140 182]
335	16828	CbVs	superficial stratum of cerebellar vermis	10	15564	[180 201 51]
336	16845	PBv	ventricular zone of the PBC	9	15564	[111 178 82]
337	16847	PBp	periventricular stratum of the PBC	10	15564	[ 97 208 151]
338	16849	PBi	intermediate stratum of the PBC	10	15564	[ 29 100 197]
339	16851	PBs	superficial stratum of the PBC	10	15564	[183 197 80]
340	16866	isLimv	ventricular zone of isLim	9	15564	[143 191 244]
341	16868	isLimp	periventricular stratum of isLim	10	15564	[204 171 152]
342	16871	isLimi	intermediate stratum of isLim	10	15564	[241 18 46]
343	16874	isLims	superficial stratum of isLim	10	15564	[ 47 136 63]
344	16876	isB	isthmic basal plate	5	15564	[181 17 223]
345	16878	isBLv	ventricular zone of isBL	9	15564	[133 142 168]
346	16880	isBLp	periventricular stratum of isBL	10	15564	[54 88 51]
347	16882	isBLi	intermediate stratum of isBL	10	15564	[ 87 244 246]
348	16885	isBLs	superficial stratum of isBL	10	15564	[161 251 227]
349	16888	isBIv	ventricular zone of isBI	9	15564	[86 99 94]
350	16890	isBIp	periventricular stratum of isBI	10	15564	[252 233 38]
351	16893	isBIi	intermediate stratum of isBI	10	15564	[230 141 59]
352	16895	isBIs	superficial stratum of isBI	10	15564	[167 39 73]
353	16898	isBMv	ventricular zone of isBM	9	15564	[61 66 57]
354	16900	isBMp	periventricular mantle of isBM	10	15564	[35 34 42]
355	16902	isBMi	intermediate mantle of isBM	10	15564	[ 83 72 193]
356	16907	isBMs	superficial mantle of isBM	10	15564	[140 241 107]
357	16912	isFv	ventricular zone of isF	9	15564	[110 130 130]
358	16916	r1R	r1 roof plate	5	15564	[122 239 226]
359	16919	r1A	r1 alar plate	5	15564	[129 66 107]
360	16922	CbHv	ventricular zone of CbH	9	15564	[ 79 35 232]
361	16925	CbHp	periventricular stratum of CbH	10	15564	[160 204 214]
362	16927	CbHi	intermediate stratum of CbH	10	15564	[225 234 76]
363	16938	CbHs	superficial stratum of cerebellar hemisphere	10	15564	[139 141 239]
364	16951	r1Vev	ventricular zone of r1Ve	9	15564	[250 231 122]
365	16955	r1Trv	ventricular zone of r1Tr	9	15564	[198 176 88]
366	16960	r1Limv	ventricular zone of r1Lim	9	15564	[174 216 13]
367	16967	r1B	r1 basal plate	5	15564	[118 230 88]
368	16969	r1BLv	ventricular zone of r1BL	9	15564	[136 44 184]
369	16971	r1BLp	periventricular stratum of r1BL	10	15564	[24 81 30]
370	16975	r1BLi	intermediate stratum of r1BL	10	15564	[173 246 140]
371	16981	r1BLs	superficial stratum of r1BL	10	15564	[101 153 102]
372	16985	r1BIv	ventricular zone of r1BI	9	15564	[ 98 230 250]
373	16987	r1BIp	periventricular stratum of r1BI	10	15564	[57 37 31]
374	16990	r1BIi	intermediate stratum of r1BI	10	15564	[119 215 64]
375	16993	r1BIs	superficial stratum of r1BI	10	15564	[237 173 205]
376	16995	r1BMv	ventricular zone of r1BM	9	15564	[250 154 21]
377	16997	r1BMp	periventricular stratum of r1BM	10	15564	[109 157 199]
378	17004	r1BMi	intermediate stratum of r1BM	10	15564	[183 203 87]
379	17013	r1BMs	superficial stratum of r1BM	10	15564	[169 225 146]
380	17024	r2R	r2 roof plate	5	15564	[198 232 46]
381	17025	r2A	r2 alar plate	5	15564	[114 236 35]
382	17027	r2Cov	ventricular zone of r2Co	9	15564	[224 28 130]
383	17032	r2Vev	ventricular zone of r2Ve	9	15564	[190 232 205]
384	17037	r2Trv	ventricular zone of r2Tr	9	15564	[132 181 43]
385	17043	r2Limv	ventricular zone of r2Lim	9	15564	[127 83 221]
386	17053	r2B	r2 basal plate	5	15564	[ 95 217 207]
387	17055	r2BLv	ventricular zone of r2BL	9	15564	[217 111 41]
388	17057	r2BLp	periventricular stratum of r2BL	10	15564	[ 24 95 235]
389	17058	r2BLi	intermediate stratum of r2BL	10	15564	[166 178 20]
390	17063	r2BLs	superficial stratum of r2BL	10	15564	[143 93 41]
391	17067	r2BIv	ventricular zone of r2BI	9	15564	[154 116 154]
392	17069	r2BIp	periventricular stratum of r2BI	10	15564	[87 90 22]
393	17074	r2BIi	intermediate stratum of r2BI	10	15564	[ 73 191 163]
394	17078	r2BIs	superficial stratum of r2BI	10	15564	[198 219 186]
395	17080	r2BMv	ventricular zone of r2BM	9	15564	[230 153 154]
396	17082	r2BMp	periventricular stratum of r2BM	10	15564	[254 42 191]
397	17085	r2BMi	intermediate stratum of r2BM	10	15564	[101 58 54]
398	17089	r2BMs	superficial stratum of r2BM	10	15564	[120 184 234]
399	17094	r3R	r3 roof plate	5	15564	[235 110 84]
400	17095	r3A	r3 alar plate	5	15564	[252 58 170]
401	17097	r3Cov	ventricular zone of r3Co	9	15564	[169 212 177]
402	17102	r3Vev	ventricular zone of r3Ve	9	15564	[164 106 154]
403	17108	r3Trv	ventricular zone of r3Tr	9	15564	[237 23 54]
404	17114	r3Limv	ventricular zone of r3Lim	9	15564	[ 90 94 134]
405	17123	r3B	r3 basal plate	5	15564	[189 228 252]
406	17125	r3BLv	ventricular zone of r3BL	9	15564	[217 200 85]
407	17127	r3BLp	periventricular stratum of r3BL	10	15564	[20 15 77]
408	17129	r3BLi	intermediate stratum of r3BL	10	15564	[166 34 174]
409	17131	r3BLs	superficial stratum of r3BL	10	15564	[ 87 111 137]
410	17133	r3BIv	ventricular zone of r3BI	9	15564	[205 245 205]
411	17135	r3BIp	periventricular stratum of r3BI	10	15564	[207 26 67]
412	17139	r3BIi	intermediate stratum of r3BI	10	15564	[ 58 139 174]
413	17141	r3BIs	superficial stratum of r3BI	10	15564	[245 68 196]
414	17148	r3BMi	intermediate stratum of r3BM	10	15564	[147 192 156]
415	17153	r3BMs	superficial stratum of r3BM	10	15564	[146 112 172]
416	17157	r4R	r4 roof plate	5	15564	[ 32 50 218]
417	17158	r4A	r4 alar plate	5	15564	[ 78 102 236]
418	17160	r4Cov	ventricular zone of r4Co	9	15564	[160 64 20]
419	17165	r4Vev	ventricular zone of r4Ve	9	15564	[174 212 218]
420	17171	r4Trv	ventricular zone of r4Tr	9	15564	[69 93 89]
421	17177	r4Limv	ventricular zone of r4Lim	9	15564	[198 136 250]
422	17182	r4B	r4 basal plate	5	15564	[230 38 49]
423	17184	r4BLv	ventricular zone of r4BL	9	15564	[ 57 148 112]
424	17186	r4BLp	periventricular stratum of r4BL	10	15564	[230 198 218]
425	17188	r4BLi	intermediate stratum of r4BL	10	15564	[135 136 111]
426	17192	r4BLs	superficial stratum of r4BL	10	15564	[ 85 241 82]
427	17197	r4BIv	ventricular zone of r4BI	9	15564	[ 10 217 47]
428	17199	r4BIp	periventricular stratum of r4BI	10	15564	[ 72 226 60]
429	17203	r4BIi	intermediate stratum of r4BI	10	15564	[207 237 38]
430	17205	r4BIs	superficial stratum of r4BI	10	15564	[192 58 80]
431	17208	r4BMv	ventricular zone of r4BM	9	15564	[ 52 127 57]
432	17212	r4BMi	intermediate stratum of r4BM	10	15564	[114 25 105]
433	17217	r4BMs	superficial stratum of r4BM	10	15564	[130 212 210]
434	17222	r5R	r5 roof plate	5	15564	[157 214 68]
435	17223	r5A	r5 alar plate	5	15564	[228 207 36]
436	17225	r5Cov	ventricular zone of r5Co	9	15564	[ 56 76 160]
437	17230	r5Vev	ventricular zone of r5Ve	9	15564	[182 96 47]
438	17236	r5Trv	ventricular zone of r5Tr	9	15564	[226 244 60]
439	17243	r5Limv	ventricular zone of r5Lim	9	15564	[ 76 227 50]
440	17250	r5B	r5 basal plate	5	15564	[ 30 248 181]
441	17252	r5BLv	ventricular zone of r5BL	9	15564	[148 126 162]
442	17254	r5BLp	periventricular stratum of r5BL	10	15564	[124 196 53]
443	17256	r5BLi	intermediate stratum of 5BL	10	15564	[115 88 44]
444	17258	r5BLs	superficial stratum of r5BL	10	15564	[199 143 249]
445	17267	r5BIv	ventricular zone of r5BI	9	15564	[197 75 100]
446	17269	r5BIp	periventricular stratum of r5BI	10	15564	[203 45 215]
447	17271	r5BIi	intermediate stratum of r5BI	10	15564	[ 24 208 163]
448	17273	r5BIs	superficial stratum of r5BI	10	15564	[193 147 214]
449	17276	r5BMv	ventricular zone of r5BM	9	15564	[144 81 247]
450	17278	r5BMp	periventricular stratum of r5BM	10	15564	[ 20 89 133]
451	17280	r5BMi	intermediate stratum of r5BM	10	15564	[147 224 182]
452	17286	r5BMs	superficial stratum of r5BM	10	15564	[244 244 211]
453	17291	r6R	r6 roof plate	5	15564	[129 20 158]
454	17292	r6A	r6 alar plate	5	15564	[210 93 47]
455	17305	r6Trv	ventricular zone of r6Tr	9	15564	[192 246 224]
456	17312	r6Limv	ventricular zone of r6Lim	9	15564	[ 54 128 86]
457	17318	r6B	r6 basal plate	5	15564	[ 83 221 216]
458	17320	r6BLv	ventricular zone of r6BL	9	15564	[156 115 232]
459	17322	r6BLp	periventricular stratum of r6BL	10	15564	[180 247 52]
460	17324	r6BLi	intermediate stratum of r6BL	10	15564	[179 200 130]
461	17326	r6BLs	superficial stratum of r6BL	10	15564	[ 62 126 58]
462	17329	r6BIv	ventricular zone of r6BI	9	15564	[ 79 118 237]
463	17331	r6BIp	periventricular stratum of r6BI	10	15564	[108 160 241]
464	17333	r6BIi	intermediate stratum of r6BI	10	15564	[234 29 127]
465	17335	r6BIs	superficial stratum of r6BI	10	15564	[ 97 95 121]
466	17339	r6BMv	ventricular zone of r6BM	9	15564	[243 137 223]
467	17341	r6BMp	periventricular stratum of r6BM	10	15564	[ 95 90 111]
468	17343	r6BMi	intermediate stratum of r6BM	10	15564	[ 31 45 157]
469	17348	r6BMs	superficial stratum of r6BM	10	15564	[215 90 35]
470	17354	r7R	r7 roof plate	5	15564	[239 38 44]
471	17355	r7A	r7 alar plate	5	15564	[ 72 173 210]
472	17367	r7Trv	ventricular zone of r7Tr	9	15564	[244 183 37]
473	17374	r7Limv	ventricular zone of r7Lim	9	15564	[185 206 16]
474	17380	r7B	r7 basal plate	5	15564	[212 192 135]
475	17382	r7BLv	ventricular zone of r7BL	9	15564	[144 182 236]
476	17384	r7BLp	periventricular stratum of r7BL	10	15564	[227 181 26]
477	17386	r7BLi	intermediate stratum of r7BL	10	15564	[ 80 125 97]
478	17388	r7BLs	superficial stratum of r7BL	10	15564	[151 177 75]
479	17391	r7BIv	ventricular zone of r7BI	9	15564	[ 38 151 55]
480	17393	r7BIp	periventricular stratum of r7BI	10	15564	[237 141 32]
481	17395	r7BIi	intermediate stratum of r7BI	10	15564	[250 119 20]
482	17397	r7BIs	superficial stratum of r7BI	10	15564	[103 226 46]
483	17401	r7BMv	ventricular zone of r7BM	9	15564	[ 13 122 167]
484	17403	r7BMp	periventricular stratum of r7BM	10	15564	[160 241 49]
485	17407	r7BMi	intermediate stratum of r7BM	10	15564	[159 55 17]
486	17412	r7BMs	superficial stratum of r7BM	10	15564	[140 240 167]
487	17417	r8R	r8 roof plate	5	15564	[130 152 63]
488	17425	r8Trv	ventricular zone of r8Tr	9	15564	[196 254 82]
489	17432	r8Limv	ventricular zone of r8Lim	9	15564	[ 40 246 201]
490	17437	r8B	r8 basal plate	5	15564	[145 111 74]
491	17439	r8BLv	ventricular zone of r8BL	9	15564	[246 84 240]
492	17441	r8BLp	periventricular stratum of r8BL	10	15564	[122 41 17]
493	17443	r8BLi	intermediate stratum of r8BL	10	15564	[ 37 186 181]
494	17445	r8BLs	superficial stratum of r8BL	10	15564	[240 186 83]
495	17450	r8BIv	ventricular zone of r8BI	9	15564	[189 93 102]
496	17452	r8BIp	periventricular stratum of r8BI	10	15564	[161 230 52]
497	17455	r8BIi	intermediate stratum of r8BI	10	15564	[ 16 171 111]
498	17457	r8BIs	superficial stratum of r8BI	10	15564	[186 127 167]
499	17461	r8BMv	ventricular zone of r8BM	9	15564	[208 126 138]
500	17463	r8BMp	periventricular stratum of r8BM	10	15564	[158 133 151]
501	17467	r8BMi	intermediate stratum of r8BM	10	15564	[ 78 112 114]
502	17472	r8BMs	superficial stratum of r8BM	10	15564	[42 19 25]
503	17475	r8F	r8 floor plate	5	15564	[123 187 126]
504	17477	r9R	r9 roof plate	5	15564	[28 54 92]
505	17478	r9A	r9 alar plate	5	15564	[218 95 75]
506	17486	r9Trv	ventricular zone of r9Tr	9	15564	[211 103 150]
507	17495	r9Limv	ventricular zone of r9Lim	9	15564	[ 10 45 200]
508	17500	r9B	r9 basal plate	5	15564	[198 141 249]
509	17502	r9BLv	ventricular zone of r9BL	9	15564	[157 39 110]
510	17504	r9BLp	periventricular stratum of r9BL	10	15564	[ 68 241 178]
511	17506	r9BLi	intermediate stratum of r9BL	10	15564	[198 30 248]
512	17508	r9BLs	superficial stratum of r9BL	10	15564	[238 71 195]
513	17513	r9BIv	ventricular zone of r9BI	9	15564	[ 72 193 140]
514	17518	r9BIi	intermediate stratum of r9BI	10	15564	[106 162 149]
515	17520	r9BIs	superficial stratum of r9BI	10	15564	[216 131 106]
516	17524	r9BMv	ventricular zone of r9BM	9	15564	[207 184 110]
517	17526	r9BMp	periventricular stratum of r9BM	10	15564	[172 50 16]
518	17529	r9BMi	intermediate stratum of r9BM	10	15564	[155 129 179]
519	17534	r9BMs	superficial stratum of r9BM	10	15564	[129 42 218]
520	17537	r9F	r9 floor plate	5	15564	[191 182 247]
521	17539	r10R	r10 roof plate	5	15564	[182 99 106]
522	17540	r10A	r10 alar plate	5	15564	[ 94 242 81]
523	17548	r10Trv	ventricular zone of r10Tr	9	15564	[152 116 125]
524	17557	r10Limv	ventricular zone of r10Lim	9	15564	[105 114 159]
525	17562	r10B	r10 basal plate	5	15564	[248 176 191]
526	17564	r10BLv	ventricular zone of r10BL	9	15564	[111 97 31]
527	17566	r10BLp	periventricular stratum of r10BL	10	15564	[ 68 54 194]
528	17568	r10BLi	intermediate stratum of r10BL	10	15564	[173 211 66]
529	17570	r10BLs	superficial stratum of r10BL	10	15564	[183 106 17]
530	17572	r10BIv	ventricular zone of r10BI	9	15564	[232 110 91]
531	17574	r10BIp	periventricular stratum of r10BI	10	15564	[167 99 34]
532	17577	r10BIi	intermediate stratum of r10BI	10	15564	[183 235 63]
533	17580	r10BIs	superficial stratum of r10BI	10	15564	[187 59 53]
534	17584	r10BMp	periventricular stratum of r10BM	10	15564	[210 142 21]
535	17587	r10BMi	intermediate stratum of r10BM	10	15564	[177 141 150]
536	17592	r10BMs	superficial stratum of r10BM	10	15564	[217 147 184]
537	17597	r11R	r11 roof plate	5	15564	[114 225 11]
538	17598	r11A	r11 alar plate	5	15564	[154 86 111]
539	17604	r11Trv	ventricular zone of r11Tr	9	15564	[ 88 188 149]
540	17613	r11Limv	ventricular zone of r11Lim	9	15564	[213 216 111]
541	17620	r11B	r11 basal plate	5	15564	[236 172 29]
542	17622	r11BLv	ventricular zone of r11BL	9	15564	[ 97 251 13]
543	17624	r11BLp	periventricular stratum of r11BL	10	15564	[187 80 248]
544	17626	r11BLi	intermediate stratum of r11BL	10	15564	[234 14 149]
545	17628	r11BLs	superficial stratum of r11BL	10	15564	[218 165 142]
546	17635	r11BIi	intermediate stratum of r11BI	10	15564	[142 164 244]
547	17637	r11BIs	superficial stratum of r11BI	10	15564	[247 245 169]
548	17648	r11BMs	superficial stratum of r11BM	10	15564	[124 228 16]
549	17653	SpA	SpC alar plate	5	15564	[ 35 195 93]
550	17667	SpALv	ventricular zone of the SpAL	9	15564	[157 165 140]
551	17671	SpALi	intermediate stratum of the SpAL	10	15564	[240 151 160]
552	17674	SpALs	superficial stratum of the SpAL	10	15564	[243 139 206]
553	17682	SpAVi	intermediate stratum of the SpAV	10	15564	[113 114 75]
554	17689	SpAVs	superficial stratum of the SpAV	10	15564	[162 117 12]
555	17692	SpB	SpC basal plate (anterior horn)	5	15564	[245 63 20]
556	17694	SpBLv	ventricular zone of SpBL	9	15564	[243 233 153]
557	17698	SpBLi	intermediate stratum of SpBL	10	15564	[ 90 229 130]
558	17709	SpBLs	superficial stratum of SpBL	10	15564	[70 77 63]
559	17715	SpBIi	intermediate stratum of SpBI	10	15564	[234 173 27]
560	17724	SpBIs	superficial stratum of SpBI	10	15564	[ 77 98 200]
561	17733	SpBMs	superficial stratum of SpBM	10	15564	[104 178 253]
562	111220552	DPallv	ventricular zone of DPall	9	15564	[165 29 89]
563	111220556	DPallp	periventricular stratum of DPall	10	15564	[ 59 216 180]
564	111220558	DPalli	intermediate stratum of DPall	10	15564	[139 142 184]
565	111220560	DPalls	superficial stratum of DPall	10	15564	[ 42 199 109]
566	111220562	MPallv	ventricular zone of MPall	9	15564	[ 79 117 91]
567	111220566	MPallp	periventricular stratum of MPall	10	15564	[229 53 78]
568	111220568	MPalli	intermediate stratum of MPall	10	15564	[121 119 211]
569	111220570	MPalls	superficial stratum of MPall	10	15564	[127 178 206]
570	111220612	isADLv	ventricular zone of isADL	9	15564	[ 82 166 153]
571	111220624	r1Vep	periventricular stratum of r1Ve	10	15564	[ 22 232 140]
572	111220626	r1Vei	intermediate stratum of r1Ve	10	15564	[ 94 187 129]
573	111220628	r1Ves	superficial stratum of r1Ve	10	15564	[113 90 211]
574	111220630	r1Trp	periventricular stratum of r1Tr	10	15564	[177 207 174]
575	111220632	r1Tri	intermediate stratum of r1Tr	10	15564	[ 40 152 229]
576	111220634	r1Trs	superficial stratum of r1Tr	10	15564	[233 133 162]
577	111220636	r1Limp	periventricular stratum of r1Lim	10	15564	[148 32 250]
578	111220638	r1Limi	intermediate stratum of r1Lim	10	15564	[184 133 127]
579	111220640	r1Lims	superficial stratum of r1Lim	10	15564	[186 37 252]
580	111220650	r2Cop	periventricular stratum of r2Co	10	15564	[140 114 127]
581	111220652	r2Coi	intermediate stratum of r2Co	10	15564	[225 77 132]
582	111220654	r2Cos	superficial stratum of r2Co	10	15564	[ 92 56 252]
583	111220656	r2Vep	periventricular stratum of r2Ve	10	15564	[189 34 99]
584	111220658	r2Vei	intermediate stratum of r2Ve	10	15564	[ 30 50 163]
585	111220660	r2Ves	superficial stratum of r2Ve	10	15564	[215 239 44]
586	111220662	r2Trp	periventricular stratum of r2Tr	10	15564	[114 15 27]
587	111220664	r2Tri	intermediate stratum of r2Tr	10	15564	[127 71 224]
588	111220666	r2Trs	superficial stratum of r2Tr	10	15564	[236 248 120]
589	111220668	r2Limp	periventricular stratum of r2Lim	10	15564	[ 81 200 76]
590	111220670	r2Limi	intermediate stratum of r2Lim	10	15564	[127 150 254]
591	111220672	r2Lims	superficial stratum of r2Lim	10	15564	[ 96 117 98]
592	111220682	r3Cop	periventricular stratum of r3Co	10	15564	[ 98 227 83]
593	111220684	r3Coi	intermediate stratum of r3Co	10	15564	[241 188 136]
594	111220686	r3Cos	superficial stratum of r3Co	10	15564	[ 40 123 60]
595	111220688	r3Vep	periventricular stratum of r3Ve	10	15564	[ 70 98 103]
596	111220690	r3Vei	intermediate stratum of r3Ve	10	15564	[ 74 125 208]
597	111220692	r3Ves	superficial stratum of r3Ve	10	15564	[193 80 131]
598	111220694	r3Trp	periventricular stratum of r3Tr	10	15564	[ 56 116 190]
599	111220696	r3Tri	intermediate stratum of r3Tr	10	15564	[227 213 17]
600	111220698	r3Trs	superficial stratum of r3Tr	10	15564	[159 245 15]
601	111220700	r3Limp	periventricular stratum of r3Lim	10	15564	[ 60 36 153]
602	111220702	r3Limi	intermediate stratum of r3Lim	10	15564	[199 17 109]
603	111220704	r3Lims	superficial stratum of r3Lim	10	15564	[70 90 62]
604	111220714	r4Cop	periventricular stratum of r4Co	10	15564	[ 77 245 96]
605	111220716	r4Coi	intermediate stratum of r4Co	10	15564	[ 54 197 25]
606	111220718	r4Cos	superficial stratum of r4Co	10	15564	[ 11 208 242]
607	111220720	r4Vep	periventricular stratum of r4Ve	10	15564	[238 199 97]
608	111220722	r4Vei	intermediate stratum of r4Ve	10	15564	[ 82 110 52]
609	111220724	r4Ves	superficial stratum of r4Ve	10	15564	[ 17 128 177]
610	111220726	r4Trp	periventricular stratum of r4Tr	10	15564	[ 46 194 186]
611	111220728	r4Tri	intermediate stratum of r4Tr	10	15564	[153 51 157]
612	111220730	r4Trs	superficial stratum of r4Tr	10	15564	[222 86 151]
613	111220732	r4Limp	periventricular stratum of r4Lim	10	15564	[224 72 29]
614	111220734	r4Limi	intermediate stratum of r4Lim	10	15564	[111 154 25]
615	111220736	r4Lims	superficial stratum of r4Lim	10	15564	[225 162 14]
616	111220746	r5Cop	periventricular stratum of r5Co	10	15564	[249 176 49]
617	111220748	r5Coi	intermediate stratum of r5Co	10	15564	[246 141 16]
618	111220750	r5Cos	superficial stratum of r5Co	10	15564	[ 76 54 108]
619	111220752	r5Vep	periventricular stratum of r5Ve	10	15564	[ 22 146 135]
620	111220754	r5Vei	intermediate stratum of r5Ve	10	15564	[113 145 191]
621	111220756	r5Ves	superficial stratum of r5Ve	10	15564	[103 157 180]
622	111220758	r5Trp	periventricular stratum of r5Tr	10	15564	[206 102 174]
623	111220760	r5Tri	intermediate stratum of r5Tr	10	15564	[182 187 56]
624	111220762	r5Trs	superficial stratum of r5Tr	10	15564	[218 67 195]
625	111220764	r5Limp	periventricular stratum of r5Lim	10	15564	[244 73 47]
626	111220766	r5Limi	intermediate stratum of r5Lim	10	15564	[ 73 195 189]
627	111220768	r5Lims	superficial stratum of r5Lim	10	15564	[ 63 221 244]
628	111220780	r6Coi	intermediate stratum of r6Co	10	15564	[169 132 79]
629	111220782	r6Cos	superficial stratum of r6Co	10	15564	[ 86 56 230]
630	111220786	r6Vei	intermediate stratum of r6Ve	10	15564	[123 99 240]
631	111220788	r6Ves	superficial stratum of r6Ve	10	15564	[145 36 56]
632	111220790	r6Trp	periventricular stratum of r6Tr	10	15564	[172 152 223]
633	111220792	r6Tri	intermediate stratum of r6Tr	10	15564	[197 123 214]
634	111220794	r6Trs	superficial stratum of r6Tr	10	15564	[177 136 53]
635	111220796	r6Limp	periventricular stratum of r6Lim	10	15564	[ 92 160 225]
636	111220798	r6Limi	intermediate stratum of r6Lim	10	15564	[ 38 210 96]
637	111220800	r6Lims	superficial stratum of r6Lim	10	15564	[226 219 97]
638	111220818	r7Vei	intermediate stratum of r7Ve	10	15564	[251 138 125]
639	111220820	r7Ves	superficial stratum of r7Ve	10	15564	[181 220 70]
640	111220822	r7Trp	periventricular stratum of r7Tr	10	15564	[132 43 31]
641	111220824	r7Tri	intermediate stratum of r7Tr	10	15564	[116 109 121]
642	111220826	r7Trs	superficial stratum of r7Tr	10	15564	[241 44 226]
643	111220828	r7Limp	periventricular stratum of r7Lim	10	15564	[134 79 99]
644	111220830	r7Limi	intermediate stratum of r7Lim	10	15564	[114 207 186]
645	111220832	r7Lims	superficial stratum of r7Lim	10	15564	[140 206 89]
646	111220844	r8Vei	intermediate stratum of r8Ve	10	15564	[108 110 55]
647	111220846	r8Ves	superficial stratum of r8Ve	10	15564	[ 33 227 25]
648	111220848	r8Trp	periventricular stratum of r8Tr	10	15564	[ 79 47 202]
649	111220850	r8Tri	intermediate stratum of r8Tr	10	15564	[ 45 165 204]
650	111220852	r8Trs	superficial stratum of r8Tr	10	15564	[ 32 177 185]
651	111220854	r8Limp	periventricular stratum of r8Lim	10	15564	[134 122 246]
652	111220856	r8Limi	intermediate stratum of r8Lim	10	15564	[146 91 217]
653	111220858	r8Lims	superficial stratum of r8Lim	10	15564	[ 32 121 223]
654	111220870	r9Vei	intermediate stratum of r9Ve	10	15564	[ 13 159 253]
655	111220872	r9Ves	superficial stratum of r9Ve	10	15564	[161 234 209]
656	111220874	r9Trp	periventricular stratum of r9Tr	10	15564	[154 189 217]
657	111220876	r9Tri	intermediate stratum of r9Tr	10	15564	[199 119 171]
658	111220878	r9Trs	superficial stratum of r9Tr	10	15564	[142 76 110]
659	111220880	r9Limp	periventricular stratum of r9Lim	10	15564	[178 243 204]
660	111220882	r9Limi	intermediate stratum of r9Lim	10	15564	[153 133 142]
661	111220884	r9Lims	superficial stratum of r9Lim	10	15564	[190 73 246]
662	111220896	r10Vei	intermediate stratum of r10Ve	10	15564	[ 26 12 254]
663	111220898	r10Ves	superficial stratum of r10Ve	10	15564	[ 86 61 237]
664	111220900	r10Trp	periventricular stratum of r10Tr	10	15564	[133 146 138]
665	111220902	r10Tri	intermediate stratum of r10Tr	10	15564	[112 58 170]
666	111220904	r10Trs	superficial stratum of r10Tr	10	15564	[202 111 134]
667	111220906	r10Limp	periventricular stratum of r10Lim	10	15564	[119 246 204]
668	111220908	r10Limi	intermediate stratum of r10Lim	10	15564	[243 105 152]
669	111220910	r10Lims	superficial stratum of r10Lim	10	15564	[174 243 80]
670	111220924	r11Ves	superficial stratum of r11Ve	10	15564	[234 205 59]
671	111220926	r11Trp	periventricular stratum of r11Tr	10	15564	[192 96 116]
672	111220928	r11Tri	intermediate stratum of r11Tr	10	15564	[124 194 11]
673	111220930	r11Trs	superficial stratum of r11Tr	10	15564	[ 92 159 200]
674	111220932	r11Limp	periventricular stratum of r11Lim	10	15564	[ 48 172 190]
675	111220934	r11Limi	intermediate stratum of r11Lim	10	15564	[250 132 43]
676	111220936	r11Lims	superficial stratum of r11Lim	10	15564	[157 154 227]
677	112892285	m2Rv	ventricular zone of m2R	9	15564	[41 43 47]
678	112892289	m2Rp	periventricular stratum of m2R	10	15564	[155 160 66]
679	112892291	m2Ri	intermediate stratum of m2R	10	15564	[128 121 206]
680	112892299	m2Fv	ventricular zone of m2F	9	15564	[195 50 140]
681	112892303	m2Fp	periventricular stratum of m2F	10	15564	[ 84 123 159]
682	112892305	m2Fi	intermediate stratum of m2F	10	15564	[195 29 241]
683	112892307	m2Fs	superficial stratum of m2F	10	15564	[ 92 60 115]
684	112892309	isADLp	periventricular stratum of isADL	10	15564	[ 33 85 214]
685	112892311	isADLi	intermediate stratum of isADL	10	15564	[ 60 49 231]
686	112892313	isADLs	superficial stratum of isADL	10	15564	[ 53 254 85]
687	112892317	isFp	periventricular stratum of isF	10	15564	[123 116 237]
688	112892319	isFi	intermediate stratum of isF	10	15564	[ 32 32 231]
689	112892321	isFs	superficial stratum of isF	10	15564	[ 73 155 141]
690	112892327	r1Fp	periventricular stratum of r1F	10	15564	[157 93 108]
691	112892329	r1Fi	intermediate stratum of r1F	10	15564	[ 81 64 225]
692	112892331	r1Fs	superficial stratum of r1F	10	15564	[ 78 104 122]
693	112892333	r2Fv	ventricular zone of r2F	9	15564	[198 90 37]
694	112892337	r2Fp	periventricular stratum of r2F	10	15564	[ 40 97 226]
695	112892339	r2Fi	intermediate stratum of r2F	10	15564	[164 136 43]
696	112892341	r2Fs	superficial stratum of r2F	10	15564	[219 32 194]
697	112892343	r3Fv	ventricular zone of r3F	9	15564	[222 35 84]
698	112892347	r3Fp	periventricular stratum of r3F	10	15564	[ 15 189 220]
699	112892349	r3Fi	intermediate stratum of r3F	10	15564	[116 78 17]
700	112892351	r3Fs	superficial stratum of r3F	10	15564	[250 222 75]
701	112892353	r4Fv	ventricular zone of r4F	9	15564	[100 82 74]
702	112892357	r4Fp	periventricular stratum of r4F	10	15564	[251 90 182]
703	112892359	r4Fi	intermediate stratum of r4F	10	15564	[ 55 106 145]
704	112892361	r4Fs	superficial stratum of r4F	10	15564	[210 131 67]
705	112892363	r5Fv	ventricular zone of r5F	9	15564	[204 90 181]
706	112892367	r5Fp	periventricular stratum of r5F	10	15564	[246 198 97]
707	112892369	r5Fi	intermediate stratum of r5F	10	15564	[171 58 39]
708	112892371	r5Fs	superficial stratum of r5F	10	15564	[254 76 83]
709	112892373	r6Fv	ventricular zone of r6F	9	15564	[122 222 181]
710	112892377	r6Fp	periventricular stratum of r6F	10	15564	[ 65 188 235]
711	112892379	r6Fi	intermediate stratum of r6F	10	15564	[179 108 81]
712	112892381	r6Fs	superficial stratum of r6F	10	15564	[ 95 57 105]
713	112892383	r7Fv	ventricular zone of r7F	9	15564	[194 242 210]
714	112892387	r7Fp	periventricular stratum of r7F	10	15564	[126 186 85]
715	112892389	r7Fi	intermediate stratum of r7F	10	15564	[ 99 180 77]
716	112892391	r7Fs	superficial stratum of r7F	10	15564	[203 57 91]
717	112892395	r8Fv	ventricular zone of r8F	9	15564	[109 91 94]
718	112892403	r8Fs	superficial stratum of r8F	10	15564	[ 30 28 151]
719	112892407	r9Fv	ventricular zone of r9F	9	15564	[165 75 232]
720	112892411	r9Fp	periventricular stratum of r9F	10	15564	[ 26 202 247]
721	112892413	r9Fi	intermediate stratum of r9F	10	15564	[190 40 151]
722	112892415	r9Fs	superficial stratum of r9F	10	15564	[247 185 159]
723	112892425	r10Fi	intermediate stratum of r10F	10	15564	[117 101 239]
724	112892427	r10Fs	superficial stratum of r10F	10	15564	[ 20 108 203]
725	114403703	m1Rp	periventricular stratum of m1R	10	15564	[245 36 233]
726	114403707	m1Ri	intermediate stratum of m1R	10	15564	[126 114 60]
727	114403711	m1Rs	superficial stratum of m1R	10	15564	[191 15 42]
728	114403719	isRp	periventricular stratum of isR	10	15564	[220 161 51]
729	114403723	isRi	intermediate stratum of isR	10	15564	[246 238 235]

## Sheet: ABA-E18pt5
	Region	RegionAbbr	RegionName	Level	Parent	RGB
0	15570	POR	preoptic roof plate	5	15564	[113 168 117]
1	15576	POA	preoptic alar plate	5	15564	[246 103 203]
2	15623	THyA	alar part of terminal hypothalamus	5	15564	[149 236 27]
3	15666	THyB	basal part of terminal hypothalamus	5	15564	[ 14 213 200]
4	15736	THyF	floor of terminal hypothalamus	5	15564	[249 205 123]
5	15740	TelR	roof plate of evaginated telencephalic vesicle	5	15564	[ 38 166 45]
6	15750	TelA	alar plate of evaginated telencephalic vesicle	5	15564	[137 111 117]
7	15818	CSPall	central subpallium (classic basal ganglia)	7	15564	[121 149 22]
8	16001	DPall	dorsal pallium/isocortex	7	15564	[159 161 241]
9	16114	MPall	medial pallium (hippocampal allocortex)	7	15564	[ 98 117 180]
10	16212	PHyA	alar part of peduncular hypothalamus	5	15564	[173 174 61]
11	16247	PHyB	basal peduncular hypothalamus	5	15564	[138 99 149]
12	16306	PHyF	floor of peduncular hypothalamus	5	15564	[252 35 61]
13	16311	p3R	roof plate of p3	5	15564	[170 72 124]
14	16313	p3A	alar plate of p3 (alar prethalamus)	5	15564	[ 48 37 170]
15	16353	p3B	basal plate of p3	5	15564	[ 58 100 211]
16	16368	p3F	floor plate of p3	5	15564	[215 33 249]
17	16377	p2R	roof plate of p2 (epithalamic roofplate)	5	15564	[249 158 191]
18	16382	p2A	alar plate of p2 (alar thalamus)	5	15564	[79 62 82]
19	16487	p2B	basal plate of p2	5	15564	[ 87 111 39]
20	16502	p2F	floor plate of p2	5	15564	[148 119 138]
21	16511	p1R	roof plate of p1	5	15564	[151 237 88]
22	16519	p1A	alar plate of p1	5	15564	[ 42 185 80]
23	16624	p1B	basal plate of p1	5	15564	[153 14 213]
24	16641	p1F	floor plate of p1	5	15564	[176 76 190]
25	16652	m1R	roof plate of m1	5	15564	[111 151 155]
26	16658	m1A	alar plate of m1	5	15564	[ 64 243 119]
27	16726	m1B	basal plate of m1	5	15564	[181 82 209]
28	16742	m1F	floor plate of m1	5	15564	[225 152 226]
29	16753	m2R	m2 roof	5	15564	[187 132 244]
30	16754	m2A	m2 alar plate	5	15564	[113 158 22]
31	16791	m2B	m2 basal plate	5	15564	[171 81 161]
32	16805	m2F	m2 floor plate	5	15564	[ 68 83 149]
33	16811	isR	isthmic roof plate	5	15564	[150 170 169]
34	16813	isA	isthmic alar plate	5	15564	[229 100 116]
35	16876	isB	isthmic basal plate	5	15564	[207 182 34]
36	16911	isF	isthmic floor plate	5	15564	[184 254 46]
37	16916	r1R	r1 roof plate	5	15564	[ 49 160 40]
38	16919	r1A	r1 alar plate	5	15564	[207 149 109]
39	16967	r1B	r1 basal plate	5	15564	[180 121 186]
40	17022	r1F	r1 floor plate	5	15564	[249 219 12]
41	17024	r2R	r2 roof plate	5	15564	[188 52 137]
42	17025	r2A	r2 alar plate	5	15564	[ 58 14 204]
43	17053	r2B	r2 basal plate	5	15564	[ 94 237 182]
44	17091	r2F	r2 floor plate	5	15564	[ 50 162 151]
45	17094	r3R	r3 roof plate	5	15564	[238 160 141]
46	17095	r3A	r3 alar plate	5	15564	[188 86 107]
47	17123	r3B	r3 basal plate	5	15564	[ 55 241 191]
48	17155	r3F	r3 floor plate	5	15564	[65 72 38]
49	17157	r4R	r4 roof plate	5	15564	[ 86 180 102]
50	17158	r4A	r4 alar plate	5	15564	[ 16 26 176]
51	17182	r4B	r4 basal plate	5	15564	[141 229 252]
52	17219	r4F	r4 floor plate	5	15564	[172 74 15]
53	17222	r5R	r5 roof plate	5	15564	[140 103 154]
54	17223	r5A	r5 alar plate	5	15564	[164 223 77]
55	17250	r5B	r5 basal plate	5	15564	[ 55 243 178]
56	17291	r6R	r6 roof plate	5	15564	[242 189 72]
57	17292	r6A	r6 alar plate	5	15564	[136 25 60]
58	17318	r6B	r6 basal plate	5	15564	[101 123 124]
59	17354	r7R	r7 roof plate	5	15564	[221 38 136]
60	17355	r7A	r7 alar plate	5	15564	[185 107 148]
61	17380	r7B	r7 basal plate	5	15564	[ 71 129 97]
62	17417	r8R	r8 roof plate	5	15564	[197 193 231]
63	17418	r8A	r8 alar plate	5	15564	[145 153 245]
64	17437	r8B	r8 basal plate	5	15564	[69 34 22]
65	17477	r9R	r9 roof plate	5	15564	[174 202 79]
66	17478	r9A	r9 alar plate	5	15564	[ 25 128 249]
67	17500	r9B	r9 basal plate	5	15564	[ 92 245 66]
68	17540	r10A	r10 alar plate	5	15564	[240 205 164]
69	17562	r10B	r10 basal plate	5	15564	[ 81 217 161]
70	17598	r11A	r11 alar plate	5	15564	[ 95 46 250]
71	17620	r11B	r11 basal plate	5	15564	[131 166 100]
72	17653	SpA	SpC alar plate	5	15564	[211 56 135]
73	17692	SpB	SpC basal plate (anterior horn)	5	15564	[ 33 221 248]

## Sheet: ABA-P4
	Region	RegionAbbr	RegionName	Level	Parent	RGB
0	15570	POR	preoptic roof plate	5	15564	[113 168 117]
1	15576	POA	preoptic alar plate	5	15564	[246 103 203]
2	15623	THyA	alar part of terminal hypothalamus	5	15564	[149 236 27]
3	15666	THyB	basal part of terminal hypothalamus	5	15564	[ 14 213 200]
4	15736	THyF	floor of terminal hypothalamus	5	15564	[249 205 123]
5	15740	TelR	roof plate of evaginated telencephalic vesicle	5	15564	[ 38 166 45]
6	15750	TelA	alar plate of evaginated telencephalic vesicle	5	15564	[137 111 117]
7	15818	CSPall	central subpallium (classic basal ganglia)	7	15564	[121 149 22]
8	16001	DPall	dorsal pallium/isocortex	7	15564	[159 161 241]
9	16114	MPall	medial pallium (hippocampal allocortex)	7	15564	[ 98 117 180]
10	16212	PHyA	alar part of peduncular hypothalamus	5	15564	[173 174 61]
11	16247	PHyB	basal peduncular hypothalamus	5	15564	[138 99 149]
12	16306	PHyF	floor of peduncular hypothalamus	5	15564	[252 35 61]
13	16311	p3R	roof plate of p3	5	15564	[170 72 124]
14	16313	p3A	alar plate of p3 (alar prethalamus)	5	15564	[ 48 37 170]
15	16353	p3B	basal plate of p3	5	15564	[ 58 100 211]
16	16368	p3F	floor plate of p3	5	15564	[215 33 249]
17	16377	p2R	roof plate of p2 (epithalamic roofplate)	5	15564	[249 158 191]
18	16382	p2A	alar plate of p2 (alar thalamus)	5	15564	[79 62 82]
19	16487	p2B	basal plate of p2	5	15564	[ 87 111 39]
20	16502	p2F	floor plate of p2	5	15564	[148 119 138]
21	16511	p1R	roof plate of p1	5	15564	[151 237 88]
22	16519	p1A	alar plate of p1	5	15564	[ 42 185 80]
23	16624	p1B	basal plate of p1	5	15564	[153 14 213]
24	16641	p1F	floor plate of p1	5	15564	[176 76 190]
25	16652	m1R	roof plate of m1	5	15564	[111 151 155]
26	16658	m1A	alar plate of m1	5	15564	[ 64 243 119]
27	16726	m1B	basal plate of m1	5	15564	[181 82 209]
28	16742	m1F	floor plate of m1	5	15564	[225 152 226]
29	16753	m2R	m2 roof	5	15564	[187 132 244]
30	16754	m2A	m2 alar plate	5	15564	[113 158 22]
31	16791	m2B	m2 basal plate	5	15564	[171 81 161]
32	16805	m2F	m2 floor plate	5	15564	[ 68 83 149]
33	16811	isR	isthmic roof plate	5	15564	[150 170 169]
34	16813	isA	isthmic alar plate	5	15564	[229 100 116]
35	16876	isB	isthmic basal plate	5	15564	[207 182 34]
36	16911	isF	isthmic floor plate	5	15564	[184 254 46]
37	16916	r1R	r1 roof plate	5	15564	[ 49 160 40]
38	16919	r1A	r1 alar plate	5	15564	[207 149 109]
39	16967	r1B	r1 basal plate	5	15564	[180 121 186]
40	17022	r1F	r1 floor plate	5	15564	[249 219 12]
41	17024	r2R	r2 roof plate	5	15564	[188 52 137]
42	17025	r2A	r2 alar plate	5	15564	[ 58 14 204]
43	17053	r2B	r2 basal plate	5	15564	[ 94 237 182]
44	17091	r2F	r2 floor plate	5	15564	[ 50 162 151]
45	17094	r3R	r3 roof plate	5	15564	[238 160 141]
46	17095	r3A	r3 alar plate	5	15564	[188 86 107]
47	17123	r3B	r3 basal plate	5	15564	[ 55 241 191]
48	17155	r3F	r3 floor plate	5	15564	[65 72 38]
49	17157	r4R	r4 roof plate	5	15564	[ 86 180 102]
50	17158	r4A	r4 alar plate	5	15564	[ 16 26 176]
51	17182	r4B	r4 basal plate	5	15564	[141 229 252]
52	17219	r4F	r4 floor plate	5	15564	[172 74 15]
53	17222	r5R	r5 roof plate	5	15564	[140 103 154]
54	17223	r5A	r5 alar plate	5	15564	[164 223 77]
55	17250	r5B	r5 basal plate	5	15564	[ 55 243 178]
56	17289	r5F	r5 floor plate	5	15564	[242 189 72]
57	17291	r6R	r6 roof plate	5	15564	[136 25 60]
58	17292	r6A	r6 alar plate	5	15564	[101 123 124]
59	17318	r6B	r6 basal plate	5	15564	[221 38 136]
60	17354	r7R	r7 roof plate	5	15564	[185 107 148]
61	17355	r7A	r7 alar plate	5	15564	[ 71 129 97]
62	17380	r7B	r7 basal plate	5	15564	[197 193 231]
63	17417	r8R	r8 roof plate	5	15564	[145 153 245]
64	17418	r8A	r8 alar plate	5	15564	[69 34 22]
65	17437	r8B	r8 basal plate	5	15564	[174 202 79]
66	17477	r9R	r9 roof plate	5	15564	[ 25 128 249]
67	17478	r9A	r9 alar plate	5	15564	[ 92 245 66]
68	17500	r9B	r9 basal plate	5	15564	[240 205 164]
69	17540	r10A	r10 alar plate	5	15564	[ 81 217 161]
70	17562	r10B	r10 basal plate	5	15564	[ 95 46 250]
71	17598	r11A	r11 alar plate	5	15564	[131 166 100]
72	17620	r11B	r11 basal plate	5	15564	[211 56 135]
73	17650	r11F	r11 floor plate	5	15564	[ 33 221 248]
74	17653	SpA	SpC alar plate	5	15564	[232 199 91]
75	17692	SpB	SpC basal plate (anterior horn)	5	15564	[109 66 66]
76	17734	SpF	SpC floor plate	5	15564	[187 12 198]

## Sheet: ABA-P14
	Region	RegionAbbr	RegionName	Level	Parent	RGB
0	15570	POR	preoptic roof plate	5	15564	[113 168 117]
1	15576	POA	preoptic alar plate	5	15564	[246 103 203]
2	15623	THyA	alar part of terminal hypothalamus	5	15564	[149 236 27]
3	15666	THyB	basal part of terminal hypothalamus	5	15564	[ 14 213 200]
4	15736	THyF	floor of terminal hypothalamus	5	15564	[249 205 123]
5	15740	TelR	roof plate of evaginated telencephalic vesicle	5	15564	[ 38 166 45]
6	15750	TelA	alar plate of evaginated telencephalic vesicle	5	15564	[137 111 117]
7	15818	CSPall	central subpallium (classic basal ganglia)	7	15564	[121 149 22]
8	16001	DPall	dorsal pallium/isocortex	7	15564	[159 161 241]
9	16114	MPall	medial pallium (hippocampal allocortex)	7	15564	[ 98 117 180]
10	16212	PHyA	alar part of peduncular hypothalamus	5	15564	[173 174 61]
11	16247	PHyB	basal peduncular hypothalamus	5	15564	[138 99 149]
12	16306	PHyF	floor of peduncular hypothalamus	5	15564	[252 35 61]
13	16311	p3R	roof plate of p3	5	15564	[170 72 124]
14	16313	p3A	alar plate of p3 (alar prethalamus)	5	15564	[ 48 37 170]
15	16353	p3B	basal plate of p3	5	15564	[ 58 100 211]
16	16368	p3F	floor plate of p3	5	15564	[215 33 249]
17	16377	p2R	roof plate of p2 (epithalamic roofplate)	5	15564	[249 158 191]
18	16382	p2A	alar plate of p2 (alar thalamus)	5	15564	[79 62 82]
19	16487	p2B	basal plate of p2	5	15564	[ 87 111 39]
20	16502	p2F	floor plate of p2	5	15564	[148 119 138]
21	16511	p1R	roof plate of p1	5	15564	[151 237 88]
22	16519	p1A	alar plate of p1	5	15564	[ 42 185 80]
23	16624	p1B	basal plate of p1	5	15564	[153 14 213]
24	16641	p1F	floor plate of p1	5	15564	[176 76 190]
25	16652	m1R	roof plate of m1	5	15564	[111 151 155]
26	16658	m1A	alar plate of m1	5	15564	[ 64 243 119]
27	16726	m1B	basal plate of m1	5	15564	[181 82 209]
28	16742	m1F	floor plate of m1	5	15564	[225 152 226]
29	16753	m2R	m2 roof	5	15564	[187 132 244]
30	16754	m2A	m2 alar plate	5	15564	[113 158 22]
31	16791	m2B	m2 basal plate	5	15564	[171 81 161]
32	16805	m2F	m2 floor plate	5	15564	[ 68 83 149]
33	16811	isR	isthmic roof plate	5	15564	[150 170 169]
34	16813	isA	isthmic alar plate	5	15564	[229 100 116]
35	16876	isB	isthmic basal plate	5	15564	[207 182 34]
36	16911	isF	isthmic floor plate	5	15564	[184 254 46]
37	16916	r1R	r1 roof plate	5	15564	[ 49 160 40]
38	16919	r1A	r1 alar plate	5	15564	[207 149 109]
39	16967	r1B	r1 basal plate	5	15564	[180 121 186]
40	17022	r1F	r1 floor plate	5	15564	[249 219 12]
41	17024	r2R	r2 roof plate	5	15564	[188 52 137]
42	17025	r2A	r2 alar plate	5	15564	[ 58 14 204]
43	17053	r2B	r2 basal plate	5	15564	[ 94 237 182]
44	17091	r2F	r2 floor plate	5	15564	[ 50 162 151]
45	17094	r3R	r3 roof plate	5	15564	[238 160 141]
46	17095	r3A	r3 alar plate	5	15564	[188 86 107]
47	17123	r3B	r3 basal plate	5	15564	[ 55 241 191]
48	17155	r3F	r3 floor plate	5	15564	[65 72 38]
49	17157	r4R	r4 roof plate	5	15564	[ 86 180 102]
50	17158	r4A	r4 alar plate	5	15564	[ 16 26 176]
51	17182	r4B	r4 basal plate	5	15564	[141 229 252]
52	17219	r4F	r4 floor plate	5	15564	[172 74 15]
53	17222	r5R	r5 roof plate	5	15564	[140 103 154]
54	17223	r5A	r5 alar plate	5	15564	[164 223 77]
55	17250	r5B	r5 basal plate	5	15564	[ 55 243 178]
56	17289	r5F	r5 floor plate	5	15564	[242 189 72]
57	17291	r6R	r6 roof plate	5	15564	[136 25 60]
58	17292	r6A	r6 alar plate	5	15564	[101 123 124]
59	17318	r6B	r6 basal plate	5	15564	[221 38 136]
60	17351	r6F	r6 floor plate	5	15564	[185 107 148]
61	17354	r7R	r7 roof plate	5	15564	[ 71 129 97]
62	17355	r7A	r7 alar plate	5	15564	[197 193 231]
63	17380	r7B	r7 basal plate	5	15564	[145 153 245]
64	17415	r7F	r7 floor plate	5	15564	[69 34 22]
65	17417	r8R	r8 roof plate	5	15564	[174 202 79]
66	17418	r8A	r8 alar plate	5	15564	[ 25 128 249]
67	17437	r8B	r8 basal plate	5	15564	[ 92 245 66]
68	17475	r8F	r8 floor plate	5	15564	[240 205 164]
69	17477	r9R	r9 roof plate	5	15564	[ 81 217 161]
70	17478	r9A	r9 alar plate	5	15564	[ 95 46 250]
71	17500	r9B	r9 basal plate	5	15564	[131 166 100]
72	17537	r9F	r9 floor plate	5	15564	[211 56 135]
73	17540	r10A	r10 alar plate	5	15564	[ 33 221 248]
74	17562	r10B	r10 basal plate	5	15564	[232 199 91]
75	17595	r10F	r10 floor plate	5	15564	[109 66 66]
76	17598	r11A	r11 alar plate	5	15564	[187 12 198]
77	17620	r11B	r11 basal plate	5	15564	[ 29 31 174]
78	17653	SpA	SpC alar plate	5	15564	[113 146 220]
79	17692	SpB	SpC basal plate (anterior horn)	5	15564	[76 42 36]

## Sheet: ABA-P28
	Region	RegionAbbr	RegionName	Level	Parent	RGB
0	15570	POR	preoptic roof plate	5	15564	[113 168 117]
1	15576	POA	preoptic alar plate	5	15564	[246 103 203]
2	15582	VOLT	vascular organ of the lamina terminalis	11	15564	[149 236 27]
3	15584	MnPOI	median preoptic nucleus, intermediate part	11	15564	[ 14 213 200]
4	15586	MnPOS	median preoptic nucleus, superficial part	11	15564	[249 205 123]
5	15591	AVPe	anteroventral periventricular preoptic nucleus	11	15564	[ 38 166 45]
6	15592	DSPO	dorsal septopreoptic nucleus	11	15564	[137 111 117]
7	15594	PS	parastrial preoptic nucleus	11	15564	[121 149 22]
8	15595	DMPAi	dorsomedial preoptic area, intermediate part	11	15564	[159 161 241]
9	15596	LPO1	lateral preoptic area, PO1 part	11	15564	[ 98 117 180]
10	15598	DMPAs	dorsomedial preoptic area, superficial part	11	15564	[173 174 61]
11	15603	MPOPe	medial preoptic periventricular stratum	11	15564	[138 99 149]
12	15604	MPO	medial preoptic nucleus	11	15564	[252 35 61]
13	15605	MPOL	lateral part of MPO	12	15564	[170 72 124]
14	15606	MPOM	medial part of MPO	12	15564	[ 48 37 170]
15	15607	MPOC	central part of MPO	12	15564	[ 58 100 211]
16	15609	LPO2	lateral preoptic nucleus, PO2 part	11	15564	[215 33 249]
17	15611	VMPO	ventromedial preoptic nucleus	11	15564	[249 158 191]
18	15612	VLPO	ventrolateral preoptic nucleus	11	15564	[79 62 82]
19	15618	StHy	striohypothalamic nucleus	11	15564	[ 87 111 39]
20	15619	POHA	preopto-hypothalamic area	11	15564	[148 119 138]
21	15621	ESO	episupraoptic nucleus	11	15564	[151 237 88]
22	15623	THyA	alar part of terminal hypothalamus	5	15564	[ 42 185 80]
23	15628	RPa	rostral paraventricular nucleus	11	15564	[153 14 213]
24	15630	LA	lateral anterior hypothalamic nucleus	11	15564	[176 76 190]
25	15631	TSM	terminal nucleus of the stria medullaris	11	15564	[111 151 155]
26	15633	SO	supraoptic nucleus	11	15564	[ 64 243 119]
27	15657	SCHp	suprachiasmatic nucleus, periventricular part	11	15564	[181 82 209]
28	15658	TSPa	terminal subparaventricular area	11	15564	[225 152 226]
29	15660	SCH	suprachiasmatic nucleus	11	15564	[187 132 244]
30	15662	AH	anterior hypothalamic nucleus	11	15564	[113 158 22]
31	15664	SCHs	shell of SCH	12	15564	[171 81 161]
32	15666	THyB	basal part of terminal hypothalamus	5	15564	[ 68 83 149]
33	15671	ABasp	periventricular part of the anterobasal nucleus	11	15564	[150 170 169]
34	15672	VMHp	periventricular domain associated to VMH	11	15564	[229 100 116]
35	15674	ABasc	core part of the anterobasal nucleus	11	15564	[207 182 34]
36	15675	VMH	ventromedial hypothalamic nucleus	11	15564	[184 254 46]
37	15676	VMHdm	dorsomedial part of VMH	12	15564	[ 49 160 40]
38	15677	VMHce	central part of VMH	12	15564	[207 149 109]
39	15678	VMHvl	ventrolateral part of VMH	12	15564	[180 121 186]
40	15679	VMHsh	shell of VMH	12	15564	[249 219 12]
41	15681	ABass	shell part of the anterobasal nucleus	11	15564	[188 52 137]
42	15682	SbO	suboptic nucleus	11	15564	[ 58 14 204]
43	15683	Tu	tuberal nucleus	11	15564	[ 94 237 182]
44	15688	Arcp	periventricular part of the arcuate nucleus	11	15564	[ 50 162 151]
45	15689	ME	median eminence	11	15564	[238 160 141]
46	15690	Inf	infundibulum	11	15564	[188 86 107]
47	15691	NHy	neurohypophysis	11	15564	[ 55 241 191]
48	15692	T-DMHp	periventricular domain associated to T-DMH	11	15564	[65 72 38]
49	15695	T-DMHc	core of T-DMH	12	15564	[ 86 180 102]
50	15696	T-DMHs	shell of T-DMH	12	15564	[ 16 26 176]
51	15697	Arci	intermediate part of the arcuate nucleus	11	15564	[141 229 252]
52	15698	PMV	ventral premammillary nucleus (migrated)	11	15564	[172 74 15]
53	15700	Arcs	superficial part of arcuate nucleus	11	15564	[140 103 154]
54	15701	MTu	medial tuberal nucleus	11	15564	[164 223 77]
55	15709	VTMi	ventral tuberomammillary nucleus, intermediate part (histaminergic)	11	15564	[ 55 243 178]
56	15711	VTMs	ventral tuberomammillary nucleus, superficial part (histaminergic)	11	15564	[242 189 72]
57	15717	PPeM	periventricular perimammillary area	11	15564	[136 25 60]
58	15719	PMD	dorsal premammillary nucleus	11	15564	[101 123 124]
59	15721	Te	terete nucleus	11	15564	[221 38 136]
60	15727	MnM	median mammillary nucleus	11	15564	[185 107 148]
61	15730	MMm	medial part of MM	12	15564	[ 71 129 97]
62	15731	MMl	lateral part of MM	12	15564	[197 193 231]
63	15734	LM	lateral mammillary nucleus	11	15564	[145 153 245]
64	15735	VTMm	ventral tuberomammillary nucleus, migrated part (histaminergic)	11	15564	[69 34 22]
65	15736	THyF	floor of terminal hypothalamus	5	15564	[174 202 79]
66	15740	TelR	roof plate of evaginated telencephalic vesicle	5	15564	[ 25 128 249]
67	15750	TelA	alar plate of evaginated telencephalic vesicle	5	15564	[ 92 245 66]
68	15758	MnSC	median supracommissural nucleus	11	15564	[240 205 164]
69	15760	LSIV	lateral septal nucleus, intermedio-ventral part	11	15564	[ 81 217 161]
70	15761	SHy	septohypothalamic nucleus	11	15564	[ 95 46 250]
71	15763	VDB	vertical nucleus of the diagonal band	11	15564	[131 166 100]
72	15764	MS	medial septal nucleus	11	15564	[211 56 135]
73	15769	LSIp	lateral septal nucleus, intermediate part, periventricular	11	15564	[ 33 221 248]
74	15771	LSII	lateral septal nucleus, intermedio-intermediate part	11	15564	[232 199 91]
75	15772	Ld	lambdoid septal zone	11	15564	[109 66 66]
76	15778	LSD	lateral septal nucleus, dorsal part	11	15564	[187 12 198]
77	15779	TS	triangular septal nucleus	11	15564	[ 29 31 174]
78	15780	SFi	septofimbrial nucleus	11	15564	[113 146 220]
79	15782	LSID	lateral septal nucleus, intermedio-dorsal part	11	15564	[76 42 36]
80	15784	PaSe	paraseptal subpallium	7	15564	[ 74 121 177]
81	15790	BSTMv	nucleus of the stria terminalis, medial division, ventral part	12	15564	[ 79 103 86]
82	15791	BSTMa	nucleus of the stria terminalis, medial division, anterior part	12	15564	[ 23 180 200]
83	15793	SIBT	substantia innominata/basal nucleus, transitional part	11	15564	[116 101 153]
84	15794	BAC	bed nucleus of the anterior commissure	11	15564	[100 92 122]
85	15796	HDBT	horizontal nucleus of the diagonal band, transitional part	11	15564	[205 28 137]
86	15804	SePalCo	septopallidal core nucleus	11	15564	[151 245 168]
87	15805	SePalSh	septopallidal shell area	11	15564	[183 134 141]
88	15807	TuSePal	septopallidal part of the olfactory tuberculum	11	15564	[ 78 65 106]
89	15808	ICjM	island of Calleja major	11	15564	[ 55 231 143]
90	15813	AcbCo	accumbens nucleus, core domain	11	15564	[226 122 187]
91	15815	AcbSh	accumbens nucleus, shell domain	11	15564	[231 179 181]
92	15817	TuSeStr	septostriatal part of the olfactory tuberculum	11	15564	[195 165 68]
93	15818	CSPall	central subpallium (classic basal ganglia)	7	15564	[205 244 122]
94	15823	BSTMC	bed nucleus of the stria terminalis, mediocentral division	11	15564	[220 122 243]
95	15829	SIB	substantia innominata/basal nucleus	11	15564	[211 232 209]
96	15830	IPal	internal globus pallidus	11	15564	[164 107 25]
97	15832	HDB	horizontal nucleus of the diagonal band	11	15564	[ 73 218 18]
98	15833	MCDB	magnocellular diagonal band nucleus	11	15564	[97 97 22]
99	15838	BSTLC	bed nucleus of the stria terminalis, laterocentral division	11	15564	[108 237 34]
100	15843	EPal	external globus pallidum	11	15564	[223 121 90]
101	15844	VPal	ventral pallidum	11	15564	[160 18 13]
102	15847	TuPal1	plexiform layer of TuPal	12	15564	[41 71 64]
103	15848	TuPal2	corticoid layer of TuPal	12	15564	[42 19 38]
104	15849	TuPal3	polymorph layer of TuPal	12	15564	[248 252 110]
105	15850	ICjPal	pallidal islands of Calleja	11	15564	[166 130 252]
106	15855	Cau	caudate nucleus	11	15564	[201 80 69]
107	15857	Put	putamen	11	15564	[ 70 173 136]
108	15858	VStr	ventral striatum	11	15564	[145 80 183]
109	15859	IPAC	interstitial nucleus of the posterior limb of the anterior commissure	11	15564	[ 98 213 236]
110	15860	LSS	laterostriatal stripe	11	15564	[ 66 95 209]
111	15863	TuStr1	plexiform layer of TuStr	12	15564	[247 231 82]
112	15864	TuStr2	corticoid layer of TuStr	12	15564	[ 71 35 242]
113	15865	TuStr3	polymorph layer of TuStr	12	15564	[178 24 189]
114	15866	ICjStr	striatal islands of Calleja	11	15564	[121 102 101]
115	15867	ASPall	subpallial amygdala	7	15564	[ 68 82 120]
116	15872	ASt	amygdalo-striatal transition	11	15564	[215 68 133]
117	15874	CeL	central amygdalar nucleus, lateral part	11	15564	[165 222 240]
118	15875	CeC	central amygdalar nucleus, capsular part	11	15564	[181 247 253]
119	15876	IA	intercalated amygdaloid nuclei	11	15564	[43 81 47]
120	15882	BSTLA	bed nucleus of stria terminalis, lateral amygdaloid division	11	15564	[ 66 158 103]
121	15884	CeM	central amygdaloid nucleus, medial part	11	15564	[247 143 77]
122	15899	MePD	medial amygdala, posterodorsal part	11	15564	[229 109 145]
123	15900	MePV	medial amygdala, posteroventral part	11	15564	[121 108 111]
124	15901	MeAD	medial amygdala, anterodorsal part	11	15564	[137 101 138]
125	15902	MeAV	medial amygdala, anteroventral part	11	15564	[ 91 236 221]
126	15904	VPall	ventral pallium	7	15564	[ 72 119 55]
127	15909	OB-Gr	OB granular layer	11	15564	[191 176 162]
128	15910	OB-Ipl	OB inner plexiform layer	11	15564	[ 60 93 175]
129	15912	OB-Mtr	OB mitral cell layer	11	15564	[143 79 27]
130	15913	OB-Opl	OB outer plexiform layer	11	15564	[ 17 101 139]
131	15915	OB-Glom	OB glomerular layer	11	15564	[ 31 109 23]
132	15916	OB-OF	OB olfactory fiber layer	11	15564	[162 78 61]
133	15923	AOV1	layer 1 of AOV cortex	11	15564	[151 180 174]
134	15924	AOV2	layer 2 of AOV cortex	11	15564	[ 10 168 157]
135	15925	AOV3	layer 3 of AOV cortex	11	15564	[245 14 180]
136	15926	AOVE	external part of AOV	11	15564	[134 91 203]
137	15927	Nv	navicular nucleus	11	15564	[118 137 180]
138	15933	BEC	bed nucleus of the external capsule	11	15564	[ 65 110 162]
139	15934	DEn	dorsal endopiriform nucleus	11	15564	[161 42 250]
140	15935	VEn	ventral endopiriform nucleus	11	15564	[133 235 142]
141	15937	VPrP1	layer 1 of VPrP cortex	11	15564	[213 247 235]
142	15938	VPrP2	layer 2 of VPrP cortex	11	15564	[ 52 105 243]
143	15939	VPrP3	layer 3 of VPrP cortex	11	15564	[ 49 227 119]
144	15944	La	lateral amygdaloid nucleus	11	15564	[ 49 171 117]
145	15945	AHi	amygdalohippocampal area	11	15564	[180 70 19]
146	15947	BMA	basomedial amygdaloid nucleus, anterior part	11	15564	[ 24 232 191]
147	15948	BMP	basomedial amygdaloid nucleus, posterior part	11	15564	[174 139 84]
148	15950	PMCo	posteromedial cortical amygdaloid area	11	15564	[156 125 102]
149	15951	LOT	nucleus of the lateral olfactory tract	11	15564	[ 52 90 176]
150	15952	LOT3	layer 3 of LOT	12	15564	[158 127 125]
151	15953	LOT2	layer 2 of LOT	12	15564	[136 159 121]
152	15954	LOT1	layer 1 of LOT	12	15564	[247 42 33]
153	15956	LPall	lateral pallium	7	15564	[154 171 107]
154	15961	AGr	AOB, granular layer	11	15564	[ 96 186 166]
155	15962	AIPl	AOB, internal plexiform layer	11	15564	[249 227 197]
156	15964	AMtr	AOB, mitral cell layer	11	15564	[92 46 39]
157	15965	AOPl	AOB, outer plexiform layer	11	15564	[115 137 199]
158	15967	AGlom	AOB, glomerular layer	11	15564	[ 38 57 154]
159	15975	AOD1	layer 1 of AOD cortex	11	15564	[217 239 250]
160	15976	AOD2	layer 2 of AOD cortex	11	15564	[103 46 177]
161	15977	AOD3	layer 3 of AOD cortex	11	15564	[221 33 131]
162	15978	AODE	external part of AOD	11	15564	[ 69 51 220]
163	15984	Cl	claustrum	11	15564	[125 60 121]
164	15986	LPrP1	layer 1 of LPrP cortex	11	15564	[113 219 38]
165	15987	LPrP2	layer 2 of LPrP cortex	11	15564	[108 107 174]
166	15988	LPrP3	layer 3 of LPrP cortex	11	15564	[184 166 107]
167	15994	BLA	basolateral amygdaloid nucleus, anterior part	11	15564	[160 27 211]
168	15995	BLP	basolateral amygdaloid nucleus, posterior part	11	15564	[187 141 37]
169	15996	BLV	basolateral amygdaloid nucleus, ventral part	11	15564	[109 88 27]
170	15998	APir	amygdalopiriform area	11	15564	[ 36 158 182]
171	15999	PLCo	posterolateral cortical amygdaloid area	11	15564	[244 35 222]
172	16000	ACo	anterior cortical amygdaloid area	11	15564	[141 173 138]
173	16008	FC-1	layer 1 of FCx	11	15564	[ 56 22 136]
174	16009	FC-2	layer 2 of FCx	11	15564	[101 64 46]
175	16010	FC-3	layer 3 of FCx	11	15564	[64 54 74]
176	16011	FC-4	layer 4 of FCx	11	15564	[ 26 219 49]
177	16012	FC-5	layer 5 of FCx	11	15564	[199 121 47]
178	16014	FC-6a	sublayer 6a of FCx	12	15564	[116 139 151]
179	16015	FC-6b	sublayer 6b of FCx	12	15564	[194 237 17]
180	16022	PC-1	layer 1 of PCx	11	15564	[106 225 179]
181	16023	PC-2	layer 2 of PCx	11	15564	[196 99 132]
182	16024	PC-3	layer 3 of PCx	11	15564	[ 99 116 131]
183	16025	PC-4	layer 4 of PCx	11	15564	[ 77 138 60]
184	16026	PC-5	layer 5 of PCx	11	15564	[ 21 247 10]
185	16027	PC-6	layer 6 of PCx	11	15564	[160 29 226]
186	16028	PC-6a	sublayer 6a of PCx	12	15564	[246 134 83]
187	16029	PC-6b	sublayer 6b of PCx	12	15564	[238 137 75]
188	16036	OC-1	layer 1 of OCx	11	15564	[101 15 70]
189	16037	OC-2	layer 2 of OCx	11	15564	[220 122 118]
190	16038	OC-3	layer 3 of OCx	11	15564	[225 241 253]
191	16039	OC-4	layer 4 of OCx	11	15564	[246 204 175]
192	16040	OC-5	layer 5 of OCx	11	15564	[ 63 50 236]
193	16041	OC-6	layer 6 of OCx	11	15564	[121 131 200]
194	16042	OC-6a	sublayer 6a of OCx	12	15564	[ 44 114 216]
195	16043	OC-6b	sublayer 6b of OCx	12	15564	[55 48 84]
196	16050	TC-1	layer 1 of TCx	11	15564	[114 57 149]
197	16051	TC-2	layer 2 of TCx	11	15564	[156 38 249]
198	16052	TC-3	layer 3 of TCx	11	15564	[105 109 71]
199	16053	TC-4	layer 4 of TCx	11	15564	[ 19 166 110]
200	16054	TC-5	layer 5 of TCx	11	15564	[208 183 243]
201	16055	TC-6	layer 6 of TCx	11	15564	[229 198 97]
202	16064	InsC-1	layer 1 of InsCx	11	15564	[ 80 224 37]
203	16065	InsC-2	layer 2 of InsCx	11	15564	[ 54 108 192]
204	16066	InsC-3	layer 3 of InsCx	11	15564	[129 15 114]
205	16067	InsC-4	layer 4 of InsCx	11	15564	[ 61 238 62]
206	16068	InsC-5	layer 5 of InsCx	11	15564	[206 48 158]
207	16069	InsC-6	layer 6 of InsCx	11	15564	[188 166 208]
208	16070	InsC-6a	sublayer 6a of InsCx	12	15564	[234 22 81]
209	16071	InsC-6b	sublayer 6b of InsCx	12	15564	[112 52 57]
210	16078	CC-1	layer 1 of CCx	11	15564	[125 226 189]
211	16079	CC-2	layer 2 of CCx	11	15564	[101 136 227]
212	16080	CC-3	layer 3 of CCx	11	15564	[ 11 180 235]
213	16081	CC-4	layer 4 of CCx	11	15564	[ 53 128 70]
214	16082	CC-5	layer 5 of CCx	11	15564	[239 236 79]
215	16084	CC-6a	sublayer 6a of CCx	12	15564	[157 245 46]
216	16085	CC-6b	sublayer 6b of CCx	12	15564	[224 130 230]
217	16087	PRh-Ect-1	layer 1 of PRh-Ect	11	15564	[140 89 138]
218	16088	PRh-Ect-2	layer 2 of PRh-Ect	11	15564	[116 97 234]
219	16089	PRh-Ect-3	layer 3 of PRh-Ect	11	15564	[188 81 151]
220	16090	PRh-Ect-4	layer 4 of PRh-Ect	11	15564	[204 94 198]
221	16091	PRh-Ect-5	layer 5 of PRh-Ect	11	15564	[ 44 222 118]
222	16092	PRh-Ect-6	layer 6 of PRh-Ect	11	15564	[119 149 162]
223	16094	RSC-1	layer 1 of RSC	11	15564	[222 163 108]
224	16095	RSC-2	layer 2 of RSC	11	15564	[208 95 61]
225	16096	RSC-3	layer 3 of RSC	11	15564	[224 235 39]
226	16097	RSC-4	layer 4 of RSC	11	15564	[ 52 38 230]
227	16098	RSC-5	layer 5 of RSC	11	15564	[250 33 221]
228	16099	RSC-6	layer 6 of RSC	11	15564	[100 93 195]
229	16100	RSC-6a	layer 6a of RSC	12	15564	[171 136 128]
230	16101	RSC-6b	layer 6b of RSC	12	15564	[145 212 187]
231	16108	ER-1	layer 1 of ERCx	11	15564	[199 63 231]
232	16109	ER-2	layer 2 of ERCx	11	15564	[ 91 54 126]
233	16110	ER-3	layer 3 of ERCx	11	15564	[83 73 90]
234	16111	ER-4	layer 4 of ERCx	11	15564	[44 65 41]
235	16112	ER-5	layer 5 of ERCx	11	15564	[106 86 186]
236	16113	ER-6	layer 6 of ERCx	11	15564	[188 209 63]
237	16114	MPall	medial pallium (hippocampal allocortex)	7	15564	[78 81 54]
238	16120	DGHil	hilus of the DG	11	15564	[127 137 219]
239	16122	DGGran	granule cell layer of the DG	11	15564	[ 63 162 37]
240	16123	DGMol	molecular layer of the DG	11	15564	[ 88 138 128]
241	16132	CA1so	Field CA1, stratum oriens	12	15564	[ 26 225 190]
242	16133	CA1sp	Field CA1, stratum pyramidale	12	15564	[240 134 254]
243	16134	CA1sr	Field CA1, stratum radiatum	12	15564	[141 129 84]
244	16135	CA1slm	Field CA1, stratum lacunosum-moleculare	12	15564	[235 207 187]
245	16137	CA2slm	Field CA2, stratum lacunosum-moleculare	12	15564	[235 130 224]
246	16138	CA2so	Field CA2, stratum oriens	12	15564	[ 62 198 12]
247	16139	CA2sp	Field CA2, stratum pyramidale	12	15564	[ 66 134 190]
248	16140	CA2sr	Field CA2, stratum radiatum	12	15564	[136 239 66]
249	16142	CA3so	Field CA3, stratum oriens	12	15564	[155 19 126]
250	16143	CA3sp	Field CA3, stratum pyramidale	12	15564	[ 20 225 137]
251	16145	CA3sr	Field CA3, stratum radiatum	12	15564	[ 64 243 152]
252	16146	CA3slm	Field CA3, stratum lacunosum-moleculare	12	15564	[ 80 121 23]
253	16153	PyIG	pyramidal layer of IG	11	15564	[129 109 154]
254	16158	DPp	dorsal peduncular cortex, periventricular part	11	15564	[ 67 162 166]
255	16160	DPi	dorsal peduncular cortex, intermediate part	11	15564	[200 217 130]
256	16162	PyTT	pyramidal layer of taenia tecta	11	15564	[253 41 125]
257	16170	PyS	pyramidal layer of S	11	15564	[241 246 186]
258	16171	SMol	molecular layer of S	11	15564	[72 74 65]
259	16177	PrSs	superficial stratum of PrS (cortical plate/marginal zone)	10	15564	[ 44 87 163]
260	16178	PrS-1	layer 1 of PrS	11	15564	[ 15 115 169]
261	16179	PrS-2	layer 2 of PrS	11	15564	[126 247 75]
262	16180	PrS-3	layer 3 of PrS	11	15564	[128 72 211]
263	16182	PrS-5	layer 5 of PrS	11	15564	[ 86 203 185]
264	16184	PrS-6a	layer 6a of PrS	12	15564	[182 112 11]
265	16185	PrS-6b	layer 6b of PrS	12	15564	[135 30 35]
266	16192	PaS-1	layer 1 of PaS	11	15564	[220 47 10]
267	16193	PaS-2	layer 2 of PaS	11	15564	[ 78 55 179]
268	16194	PaS-3	layer 3 of PaS	11	15564	[ 74 248 166]
269	16195	PaS-4	layer 4 of PaS	11	15564	[107 199 44]
270	16196	PaS-5	layer 5 of PaS	11	15564	[220 161 20]
271	16197	PaS-6	layer 6 of PaS	11	15564	[233 138 96]
272	16204	SHi	septohippocampal nucleus	11	15564	[194 226 34]
273	16212	PHyA	alar part of peduncular hypothalamus	5	15564	[ 14 246 160]
274	16217	PPa	paraventricular nucleus, peduncular or principal part	11	15564	[ 82 237 75]
275	16218	PaD	paraventricular nucleus, dorsal part	12	15564	[251 201 137]
276	16219	PaC	paraventricular nucleus, cap part	12	15564	[125 117 94]
277	16224	PaR	paraventricular nucleus, rostral part	12	15564	[ 97 79 118]
278	16226	PaL	paraventricular nucleus, lateral part	11	15564	[137 18 232]
279	16227	UDPeF	upper dorsal perifornical nucleus	11	15564	[145 218 245]
280	16228	UDLH	upper dorsal lateral hypothalamic area	11	15564	[164 254 252]
281	16229	LPo	lateral posterior nucleus	11	15564	[ 41 152 15]
282	16230	PSM	peduncular nucleus of the stria medullaris	11	15564	[244 90 166]
283	16232	EPD	dorsal entopeduncular nucleus	11	15564	[242 188 90]
284	16238	A13	A13 dopaminergic cell group	11	15564	[ 57 106 64]
285	16240	AHP	posterior part of anterior hypothalamic nucleus	11	15564	[ 55 107 77]
286	16242	LDPeF	lower dorsal perifornical nucleus	11	15564	[ 95 183 16]
287	16243	LDLH	lower dorsal lateral hypothalamic area	11	15564	[ 66 75 206]
288	16245	EPV	ventral entopeduncular nucleus	11	15564	[ 87 212 35]
289	16247	PHyB	basal peduncular hypothalamus	5	15564	[194 48 114]
290	16252	PBasp	posterobasal nucleus, periventricular part	11	15564	[ 35 22 154]
291	16254	PBasi	posterobasal nucleus, intermediate part	11	15564	[205 236 83]
292	16255	UBLH	upper basal lateral hypothalamic area	11	15564	[129 154 251]
293	16256	UBPeF	upper basal perifornical nucleus	11	15564	[105 74 241]
294	16258	MCSH	magnocellular superficial hypothalamic nucleus	11	15564	[186 236 172]
295	16263	P-DMHp	periventricular domain associated to P-DMH	11	15564	[ 58 100 183]
296	16266	P-DMHc	core of P-DMH	12	15564	[237 222 209]
297	16267	P-DMHs	shell of P-DMH	12	15564	[122 100 103]
298	16268	LBLH	lower basal lateral hypothalamic area	11	15564	[173 80 14]
299	16269	LBPeF	lower basal perifornical nucleus	11	15564	[ 85 240 227]
300	16271	LTu	lateral tuberal nucleus	11	15564	[169 94 144]
301	16272	STh	subthalamic nucleus (migrated)	11	15564	[ 34 206 20]
302	16273	PSTh	parasubthalamic nucleus (migrated)	11	15564	[207 22 163]
303	16279	DTMp	dorsal tuberomammillary nucleus, periventricular part (histaminergic)	11	15564	[ 51 46 199]
304	16281	DTMi	dorsal tuberomammillary nucleus, intermediate part (histaminergic)	11	15564	[250 250 253]
305	16283	PTe	paraterete nucleus	11	15564	[239 69 122]
306	16284	CTM	caudal tuberomammillary nucleus (histaminergic)	11	15564	[ 59 148 87]
307	16289	PPRM	periventricular periretromammillary nucleus	11	15564	[38 97 17]
308	16291	IPRM	intermediate periretromammillary nucleus	11	15564	[172 108 31]
309	16293	LPRM	lateral periretromammillary nucleus	11	15564	[ 78 51 246]
310	16299	RMM	retromammillary area, medial part	11	15564	[207 153 149]
311	16300	SMT	submammillothalamic nucleus	11	15564	[248 99 203]
312	16302	RML	retromammillary area, lateral part	11	15564	[106 244 156]
313	16306	PHyF	floor of peduncular hypothalamus	5	15564	[112 201 179]
314	16311	p3R	roof plate of p3	5	15564	[ 73 195 122]
315	16313	p3A	alar plate of p3 (alar prethalamus)	5	15564	[243 249 221]
316	16320	SM	nucleus of the stria medullaris (prethalamic)	11	15564	[227 166 115]
317	16327	RHy	retrohypothalamic nucleus	11	15564	[198 133 202]
318	16329	Rt	reticular nucleus	11	15564	[204 83 206]
319	16331	SubG	subgeniculate nucleus	11	15564	[125 175 15]
320	16337	p3ZLS	shell of p3ZL	11	15564	[ 81 250 44]
321	16339	IntC	intercalate nucleus	11	15564	[35 91 88]
322	16341	PreG	pregeniculate nucleus	11	15564	[217 103 16]
323	16342	PP	peripeduncular nucleus	11	15564	[171 47 254]
324	16349	RZI	rostral zona incerta	11	15564	[222 82 116]
325	16351	EPAc	accessory entopeduncular nucleus (post-migratory)	11	15564	[175 239 162]
326	16353	p3B	basal plate of p3	5	15564	[226 198 184]
327	16357	p3PEW	p3 portion of the pre-Edinger-Westphal nucleus	11	15564	[107 51 211]
328	16359	p3ZLC	p3 part of the ZL core	11	15564	[226 246 199]
329	16360	CZI	caudal zona incerta	11	15564	[160 19 13]
330	16361	p3Tg	tegmental field of p3 (Forel's field)	11	15564	[211 222 245]
331	16363	p3PBP	p3 portion of parabrachial pigmented nucleus	11	15564	[ 20 233 84]
332	16365	p3SNC	p3 portion of the substantia nigra pars compacta	11	15564	[250 108 173]
333	16366	p3SNR	p3 portion of the substantia nigra pars reticulata	11	15564	[198 139 68]
334	16367	p3PN	p3 portion of paranigral nucleus	11	15564	[ 73 140 182]
335	16368	p3F	floor plate of p3	5	15564	[180 201 51]
336	16374	p3VTA	p3 portion of the ventral tegmental area	11	15564	[111 178 82]
337	16377	p2R	roof plate of p2 (epithalamic roofplate)	5	15564	[ 97 208 151]
338	16379	BHbC	bed of the habenular commissure	11	15564	[ 29 100 197]
339	16382	p2A	alar plate of p2 (alar thalamus)	5	15564	[183 197 80]
340	16388	MHb	medial habenular nucleus	11	15564	[143 191 244]
341	16389	MSHb	medial subhabenular nucleus	11	15564	[204 171 152]
342	16391	LHbM	medial part of the lateral habenular nucleus	11	15564	[241 18 46]
343	16392	LSHb	lateral subhabenular nucleus	11	15564	[ 47 136 63]
344	16394	LHbL	lateral part of the lateral habenular nucleus	11	15564	[181 17 223]
345	16400	PVA	anterior paraventricular nucleus of thalamus	11	15564	[133 142 168]
346	16401	IMD	intermediodorsal nucleus	11	15564	[54 88 51]
347	16402	CM	centromedian nucleus	11	15564	[ 87 244 246]
348	16403	IAM	interanteromedial nucleus	11	15564	[161 251 227]
349	16404	IAD	interanterodorsal nucleus	11	15564	[86 99 94]
350	16405	Rh	rhomboid nucleus	11	15564	[252 233 38]
351	16406	Re	reuniens nucleus, main part	11	15564	[230 141 59]
352	16407	RRe	retroreuniens nucleus	11	15564	[167 39 73]
353	16408	VRe	ventral reuniens nucleus	11	15564	[61 66 57]
354	16410	PT	paratenial nucleus	11	15564	[35 34 42]
355	16412	MDM	medial (magnocellular) part of MD	12	15564	[ 83 72 193]
356	16413	MDL	lateral (parvicellular) part of MD	12	15564	[140 241 107]
357	16414	MDC	central part of MD	12	15564	[110 130 130]
358	16416	PC	paracentral nucleus	12	15564	[122 239 226]
359	16417	OPC	oval paracentral nucleus	12	15564	[129 66 107]
360	16418	CL	central lateral nucleus	12	15564	[ 79 35 232]
361	16420	AD	anterodorsal nucleus	12	15564	[160 204 214]
362	16421	AV	anteroventral nucleus	12	15564	[225 234 76]
363	16422	AM	anteromedial nucleus	12	15564	[139 141 239]
364	16424	VM	ventromedial nucleus	12	15564	[250 231 122]
365	16426	SubM	submedius thalamic nucleus	12	15564	[198 176 88]
366	16428	VL	ventral lateral nucleus	12	15564	[174 216 13]
367	16429	VPM	ventral posteromedial nucleus	12	15564	[118 230 88]
368	16430	VPL	ventral posterolateral nucleus	12	15564	[136 44 184]
369	16431	VPPC	ventral posterior parvicellular nucleus	12	15564	[24 81 30]
370	16432	Po	posterior (ventral) nucleus	12	15564	[173 246 140]
371	16434	LD	laterodorsal nucleus	11	15564	[101 153 102]
372	16435	LP	lateral posterior nucleus	11	15564	[ 98 230 250]
373	16436	DLG	dorsal lateral geniculate nucleus	11	15564	[57 37 31]
374	16441	PVP	posterior paraventricular nucleus	11	15564	[119 215 64]
375	16442	PF	parafascicular nucleus	11	15564	[237 173 205]
376	16445	Sc	scaphoid nucleus	11	15564	[250 154 21]
377	16446	Eth	ethmoid nucleus	11	15564	[109 157 199]
378	16447	SEth	subethmoid nucleus	11	15564	[183 203 87]
379	16448	VLi	ventral linear nucleus	11	15564	[169 225 146]
380	16449	PoT	posterior triangular nucleus	11	15564	[198 232 46]
381	16451	IPo	intermedioposterior nucleus	11	15564	[114 236 35]
382	16452	SG	suprageniculate nucleus	11	15564	[224 28 130]
383	16457	SPFMC	magnocellular (medial) subparafascicular nucleus	11	15564	[190 232 205]
384	16459	SPFPC	parvicellular (lateral) subparafascicular nucleus	11	15564	[132 181 43]
385	16460	PIL	posterior intralaminar nucleus	11	15564	[127 83 221]
386	16462	MG	medial geniculate nucleus	11	15564	[ 95 217 207]
387	16463	MGV	ventral subnucleus of MG	12	15564	[217 111 41]
388	16464	MGD	dorsal subnucleus of MG	12	15564	[ 24 95 235]
389	16471	p2ZLS	shell of p2ZL	11	15564	[166 178 20]
390	16473	IZL	interstitial nucleus of the zona limitans	11	15564	[143 93 41]
391	16474	p2ZLs	superficial stratum of p2ZL	10	15564	[154 116 154]
392	16475	IGL	intergeniculate leaflet	11	15564	[87 90 22]
393	16480	Lim	liminal nucleus	11	15564	[ 73 191 163]
394	16482	p2LimRt	reticular formation of p2Lim	11	15564	[198 219 186]
395	16487	p2B	basal plate of p2	5	15564	[230 153 154]
396	16491	p2PEW	p2 portion of the pre-Edinger-Westphal nucleus	11	15564	[254 42 191]
397	16493	p2ZLC	p2 part of the zona limitans core population	11	15564	[101 58 54]
398	16494	RI	rostral interstitial nucleus	11	15564	[120 184 234]
399	16495	PR	prerubral area	11	15564	[235 110 84]
400	16496	p2PBP	p2 portion of the parabrachial pigmented nucleus	11	15564	[252 58 170]
401	16499	p2SNC	p2 portion of the substantia nigra pars compacta	11	15564	[169 212 177]
402	16500	p2SNR	p2 portion of the substantia nigra pars reticulata	11	15564	[164 106 154]
403	16501	p2PN	p2 portion of paranigral nucleus	11	15564	[237 23 54]
404	16502	p2F	floor plate of p2	5	15564	[ 90 94 134]
405	16508	p2VTA	p2 portion of the ventral tegmental area	11	15564	[189 228 252]
406	16511	p1R	roof plate of p1	5	15564	[217 200 85]
407	16519	p1A	alar plate of p1	5	15564	[20 15 77]
408	16525	PcPD-PAG	PcPD part of the periaqueductal gray	11	15564	[166 34 174]
409	16527	DF	dorsofrontal pretectal nucleus	11	15564	[ 87 111 137]
410	16529	DFS	superficial dorsofrontal area	11	15564	[205 245 205]
411	16534	PcPL-PAG	PcPL part of the periaqueductal gray	11	15564	[207 26 67]
412	16536	APTD	anterior pretectal nucleus, dorsal core part	11	15564	[ 58 139 174]
413	16538	APTDS	anterior pretectal nucleus, dorsal superficial part	11	15564	[245 68 196]
414	16543	PcPV-PAG	PcPV part of the periaqueductal gray	11	15564	[147 192 156]
415	16545	APTV	anterior pretectal nucleus, ventral core part	11	15564	[146 112 172]
416	16547	APTVS	anterior pretectal nucleus, ventral superficial part	11	15564	[ 32 50 218]
417	16553	JcPD-PAG	JcPD part of the periaqueductal gray	11	15564	[ 78 102 236]
418	16555	DJcP	dorsal juxtacommissural pretectal nucleus	11	15564	[160 64 20]
419	16556	SpD	dorsal spiriform nucleus	11	15564	[174 212 218]
420	16563	JcPL-PAG	JcPL part of the periaqueductal gray	11	15564	[69 93 89]
421	16565	JcPLRt	reticular formation of JcPL	11	15564	[198 136 250]
422	16566	SpL	lateral spiriform nucleus	11	15564	[230 38 49]
423	16568	JcP-LTL	JcP contribution to LTL	11	15564	[ 57 148 112]
424	16573	JcPV-PAG	JcPV part of the periaqueductal gray	11	15564	[230 198 218]
425	16575	VJcP	ventral juxtacommissural pretectal nucleus	11	15564	[135 136 111]
426	16577	JcP-LTV	JcP contribution to LTV	11	15564	[ 85 241 82]
427	16583	CoPD-PAG	CoPD part of the periaqueductal gray	11	15564	[ 10 217 47]
428	16585	MPT	medial pretectal nucleus	11	15564	[ 72 226 60]
429	16586	PrPT	principal pretectal nucleus	11	15564	[207 237 38]
430	16587	CoPDRt	reticular formation of CoPD	11	15564	[192 58 80]
431	16589	OPT	olivary pretectal nucleus	11	15564	[ 52 127 57]
432	16590	DT	dorsal terminal nucleus of the accessory optic tract	11	15564	[114 25 105]
433	16595	CoPL-PAG	CoPL part of the periaqueductal gray	11	15564	[130 212 210]
434	16597	PCPC	parvicellular interstitial nucleus of the posterior commissure	11	15564	[157 214 68]
435	16598	IPT	intermediate pretectal nucleus	11	15564	[228 207 36]
436	16599	CoPLRt	reticular formation of CoPL	11	15564	[ 56 76 160]
437	16601	LTL	lateral terminal nucleus of the accessory optic tract, lateral part	11	15564	[182 96 47]
438	16606	CoPV-PAG	CoPV part of the periaqueductal gray	11	15564	[226 244 60]
439	16608	SPT	subpretectal nucleus	11	15564	[ 76 227 50]
440	16609	MCPC	magnocellular interstitial nucleus of the posterior commissure	11	15564	[ 30 248 181]
441	16611	LTV	lateral terminal nucleus of the accessory optic tract, ventral part	11	15564	[148 126 162]
442	16617	p1Lim-PAG	p1Lim part of periaqueductal gray	11	15564	[124 196 53]
443	16619	p1LimRt	reticular formation of p1Lim	11	15564	[115 88 44]
444	16620	InC	interstitial nucleus of Cajal (post-migratory)	11	15564	[199 143 249]
445	16624	p1B	basal plate of p1	5	15564	[197 75 100]
446	16628	p1B-PAG	p1B part of the periaqueductal gray	11	15564	[203 45 215]
447	16629	Dk	nucleus of Darkschewitsch	11	15564	[ 24 208 163]
448	16630	p1PEW	p1 part of the pre-Edinger-Westphal nucleus	11	15564	[193 147 214]
449	16632	p1BRt	basal reticular formation of p1	11	15564	[144 81 247]
450	16633	RPC	red nucleus, parvicellular part	11	15564	[ 20 89 133]
451	16634	p1PaR	p1 part of the pararubral nucleus	11	15564	[147 224 182]
452	16635	p1PBP	p1 part of parabrachial pigmented nucleus	11	15564	[244 244 211]
453	16637	p1MT	p1 part of the medial terminal nucleus of the accessory optic tract	11	15564	[129 20 158]
454	16638	p1SNC	p1 part of the substantia nigra compacta	11	15564	[210 93 47]
455	16639	p1SNR	p1 part of the substantia nigra reticulata	11	15564	[192 246 224]
456	16640	p1PN	p1 portion of the paranigral nucleus	11	15564	[ 54 128 86]
457	16641	p1F	floor plate of p1	5	15564	[ 83 221 216]
458	16648	p1VTA	p1 part of the ventral tegmental area	11	15564	[156 115 232]
459	16652	m1R	roof plate of m1	5	15564	[180 247 52]
460	16655	BTGC	bed of the tectal gray commissure	11	15564	[179 200 130]
461	16656	BTC	bed of the tectal commissure	11	15564	[ 62 126 58]
462	16657	BICC	bed of the intercollicular commissure	11	15564	[ 79 118 237]
463	16658	m1A	alar plate of m1	5	15564	[108 160 241]
464	16663	m1AD-PAG	m1AD (DM) part of periaqueductal gray	11	15564	[234 29 127]
465	16665	m1VPaC	ventral paracommissural tectal nucleus, m1 part	11	15564	[ 97 95 121]
466	16667	m1DPaC	dorsal paracommissural tectal nucleus, m1 part	11	15564	[243 137 223]
467	16673	TGDL-PAG	dorsolateral TG part of the periaqueductal gray	11	15564	[ 95 90 111]
468	16675	TGC	central layers of TG	11	15564	[ 31 45 157]
469	16676	TGs	superficial stratum of TG	10	15564	[215 90 35]
470	16677	TGS	superficial layers of TG	11	15564	[239 38 44]
471	16682	SCDL-PAG	dorsolateral SC part of the periaqueductal gray	11	15564	[ 72 173 210]
472	16683	DpWh	deep white layer of SC	11	15564	[244 183 37]
473	16685	DpG	deep gray layer of SC	11	15564	[185 206 16]
474	16686	InWh	intermediate white layer of SC	11	15564	[212 192 135]
475	16687	InG	intermediate gray layer of SC	11	15564	[144 182 236]
476	16689	Op	optic fiber layer of SC	11	15564	[227 181 26]
477	16690	SuG	superficial gray layer of SC	11	15564	[ 80 125 97]
478	16691	Zo	zonal layer of SC	11	15564	[151 177 75]
479	16696	ICDL-PAG	dorsolateral IC periaqueductal gray	11	15564	[ 38 151 55]
480	16698	CIC	central nucleus of the inferior colliculus	11	15564	[237 141 32]
481	16700	ICIC	internal cortical nucleus of inferior colliculus	11	15564	[250 119 20]
482	16701	DCIC	dorsal cortical nucleus of inferior colliculus	11	15564	[103 226 46]
483	16702	ECIC	external cortical nucleus of inferior colliculus	11	15564	[ 13 122 167]
484	16707	TGL-PAG	lateral TG part of the periaqueductal gray	11	15564	[160 241 49]
485	16708	SCL-PAG	lateral SC part of the periaqueductal gray	11	15564	[159 55 17]
486	16709	ICL-PAG	lateral IC periaqueductal gray	11	15564	[140 240 167]
487	16711	ICBR	nucleus of the inferior collicular brachium, rostral part	11	15564	[130 152 63]
488	16712	ICBC	nucleus of the inferior collicular brachium, caudal part	11	15564	[196 254 82]
489	16714	SubBR	subbrachial nucleus, rostral part	11	15564	[ 40 246 201]
490	16715	SubBC	subbrachial nucleus, caudal part	11	15564	[145 111 74]
491	16721	m1Lim-PAG	m1Lim (VL) part of the periaqueductal gray	11	15564	[246 84 240]
492	16723	m1LimRt	m1Lim part of the midbrain reticular formation	11	15564	[122 41 17]
493	16726	m1B	basal plate of m1	5	15564	[ 37 186 181]
494	16730	m1B-PAG	m1B part of the periaqueductal gray	11	15564	[240 186 83]
495	16731	m1PEW	m1 part of the pre-Edinger-Westphal nucleus	11	15564	[189 93 102]
496	16733	3EW	oculomotor nucleus, Edinger-Westphal subnucleus	11	15564	[161 230 52]
497	16734	3M	oculomotor nucleus, main part	11	15564	[ 16 171 111]
498	16735	m1BRt	medial basal reticular formation of m1	11	15564	[186 127 167]
499	16736	m1PaR	pararubral nucleus, m1 part	11	15564	[208 126 138]
500	16737	RMC	red nucleus, magnocellular part	11	15564	[158 133 151]
501	16739	m1PN	m1 part of paranigral nucleus	11	15564	[ 78 112 114]
502	16740	m1SNC	substantia nigra compacta, m1 part	11	15564	[42 19 25]
503	16741	m1SNR	substantia nigra reticulata, m1 part	11	15564	[123 187 126]
504	16742	m1F	floor plate of m1	5	15564	[28 54 92]
505	16748	RLi	rostral linear nucleus	11	15564	[218 95 75]
506	16750	m1VTA	ventral tegmental area, m1 part	11	15564	[211 103 150]
507	16753	m2R	m2 roof	5	15564	[ 10 45 200]
508	16754	m2A	m2 alar plate	5	15564	[198 141 249]
509	16759	PIsD-PAG	dorsal preisthmic part of periaqueductal gray	11	15564	[157 39 110]
510	16766	PIsDL-PAG	dorsolateral preisthmic part of periaqueductal gray	11	15564	[ 68 241 178]
511	16768	SagD	nucleus sagulum, deep part	11	15564	[198 30 248]
512	16770	SagS	nucleus sagulum, superficial part	11	15564	[238 71 195]
513	16775	PIsL-PAG	lateral part of preisthmic periaqueductal gray	11	15564	[ 72 193 140]
514	16777	CnF	cuneiform nucleus	11	15564	[106 162 149]
515	16785	m2Lim-PAG	liminal periaqueductal gray of m2	11	15564	[216 131 106]
516	16787	SCnF	subcuneiform nucleus	11	15564	[207 184 110]
517	16788	m2LimRt	liminal reticular formation of m2	11	15564	[172 50 16]
518	16791	m2B	m2 basal plate	5	15564	[155 129 179]
519	16795	m2B-PAG	basal m2 periaqueductal gray	11	15564	[129 42 218]
520	16796	m2DR	m2 part of the dorsal raphe nucleus	11	15564	[191 182 247]
521	16798	m2BRt	reticular formation of basal m2	11	15564	[182 99 106]
522	16799	m2PaR	m2 part of pararubral nucleus	11	15564	[ 94 242 81]
523	16801	m2PN	m2 part of paranigral nucleus	11	15564	[152 116 125]
524	16802	m2PBP	m2 part of nucleus parabrachialis pigmentosus	11	15564	[105 114 159]
525	16803	m2SNC	m2 part of substantia nigra compacta	11	15564	[248 176 191]
526	16804	m2SNR	m2 part of substantia nigra reticulata	11	15564	[111 97 31]
527	16805	m2F	m2 floor plate	5	15564	[ 68 54 194]
528	16806	m2VTA	m2 part of VTA	11	15564	[173 211 66]
529	16807	IF	interfascicular nucleus	11	15564	[183 106 17]
530	16811	isR	isthmic roof plate	5	15564	[232 110 91]
531	16813	isA	isthmic alar plate	5	15564	[167 99 34]
532	16820	CbVWM	white matter of cerebellar vermis	11	15564	[183 235 63]
533	16824	MedM	medial (main) part of Med	13	15564	[187 59 53]
534	16825	MedL	lateral part of Med	13	15564	[210 142 21]
535	16826	MedDL	dorsolateral part of Med	13	15564	[177 141 150]
536	16827	isVeCb	isthmic vestibulocerebellar nucleus	11	15564	[217 147 184]
537	16840	MolV	molecular layer of CbVCx	12	15564	[114 225 11]
538	16841	PkV	Purkinje cell layer of CbVCx	12	15564	[154 86 111]
539	16842	IGrV	internal granular layer of CbVCx	12	15564	[ 88 188 149]
540	16848	PB-PAG	parabrachial part of the periaqueductal gray	11	15564	[213 216 111]
541	16850	MPB	medial parabrachial nucleus	11	15564	[236 172 29]
542	16852	LPB	lateral parabrachial nucleus	11	15564	[ 97 251 13]
543	16853	KF	Koelliker-Fuse nucleus	11	15564	[187 80 248]
544	16858	Ist-PAG	isthmic part of the periaqueductal gray	11	15564	[234 14 149]
545	16860	DLL	dorsal nucleus of the lateral lemniscus	11	15564	[218 165 142]
546	16862	PBG	parabigeminal nucleus	11	15564	[142 164 244]
547	16863	PeLA	perilemniscal isthmic area	11	15564	[247 245 169]
548	16869	isLim-PAG	isthmic liminal part of the periaqueductal gray	11	15564	[124 228 16]
549	16870	isMes5	isthmic part of mesencephalic trigeminal nucleus	11	15564	[ 35 195 93]
550	16872	MiTg	microcellular tegmental nucleus	11	15564	[157 165 140]
551	16873	isLimRt	isthmic liminal reticular area	11	15564	[240 151 160]
552	16875	isILL	isthmic part of the intermediate lateral lemniscal nucleus	11	15564	[243 139 206]
553	16876	isB	isthmic basal plate	5	15564	[113 114 75]
554	16881	isDRDL	dorsolateral isthmic part of the dorsal raphe nucleus	11	15564	[162 117 12]
555	16883	isBLRt	isthmic part of basolateral isthmic reticular formation	11	15564	[245 63 20]
556	16886	isPaL	paralemniscal isthmic area	11	15564	[243 233 153]
557	16891	isDRI	intermediate isthmic part of the dorsal raphe nucleus	11	15564	[ 90 229 130]
558	16894	isBIRt	basointermediate isthmic reticular formation	11	15564	[70 77 63]
559	16896	isSNR	substantia nigra reticulata, isthmic part	11	15564	[234 173 27]
560	16901	isDRV	ventral isthmic part of dorsal raphe nucleus	11	15564	[ 77 98 200]
561	16903	4M	trochlear nucleus	11	15564	[104 178 253]
562	16904	4Sh	trochlear shell	11	15564	[165 29 89]
563	16905	Pa4	paratrochlear nucleus	11	15564	[ 59 216 180]
564	16906	CLi	caudal linear (raphe) nucleus	11	15564	[139 142 184]
565	16908	isSNC	substantia nigra compacta, isthmic part	11	15564	[ 42 199 109]
566	16909	IPPr	interpeduncular nucleus, prodromal part	11	15564	[ 79 117 91]
567	16910	isPN	isthmic portion of paranigral nucleus	11	15564	[229 53 78]
568	16911	isF	isthmic floor plate	5	15564	[121 119 211]
569	16914	isVTA	ventral tegmental area, isthmic part	11	15564	[127 178 206]
570	16916	r1R	r1 roof plate	5	15564	[ 82 166 153]
571	16919	r1A	r1 alar plate	5	15564	[ 22 232 140]
572	16926	CbHWM	cerebellar white matter	11	15564	[ 94 187 129]
573	16930	IntA	anterior part of Int	13	15564	[113 90 211]
574	16931	IntDL	dorsolateral part of Int	13	15564	[177 207 174]
575	16932	IntP	posterior part of Int	13	15564	[ 40 152 229]
576	16934	LatDL	dorsolateral part of Lat	13	15564	[233 133 162]
577	16935	LatPC	parvicellular part of Lat	13	15564	[148 32 250]
578	16936	r1VeCb	r1 part of vestibulocerebellar nucleus	11	15564	[184 133 127]
579	16937	A4	A4 noradrenergic cell group	11	15564	[186 37 252]
580	16939	CbHCx	cortex of cerebellar hemisphere	11	15564	[140 114 127]
581	16947	MolH	molecular layer of CbHCx	12	15564	[225 77 132]
582	16948	PkH	Purkinje cell layer of CbHCx	12	15564	[ 92 56 252]
583	16949	IGrH	internal granular layer of CbHCx	12	15564	[189 34 99]
584	16953	r1SuVe	r1 part of superior vestibular nucleus	11	15564	[ 30 50 163]
585	16957	r1Pr5	r1 part of principal trigeminal sensory nucleus	11	15564	[215 239 44]
586	16958	r1DPCRt	r1 part of dorsal parvicellular reticular formation	11	15564	[114 15 27]
587	16962	r1VPCRt	r1 part of ventral parvicellular reticular formation	11	15564	[127 71 224]
588	16964	LDTg	laterodorsal tegmental nucleus	11	15564	[236 248 120]
589	16966	r1Mes5	r1 part of the 'mesencephalic' trigeminal nucleus	11	15564	[ 81 200 76]
590	16967	r1B	r1 basal plate	5	15564	[127 150 254]
591	16972	LC	locus coeruleus	11	15564	[ 96 117 98]
592	16973	Bar	nucleus of Barrington	11	15564	[ 98 227 83]
593	16974	NPS	neuropeptide-S nucleus	11	15564	[241 188 136]
594	16978	r1BLRt	r1 part of basolateral reticular formation	11	15564	[ 40 123 60]
595	16982	r1ILL	r1 part of intermediate nucleus of the lateral lemniscus	11	15564	[ 70 98 103]
596	16988	r1BICG	r1 part of basointermediate central gray	11	15564	[ 74 125 208]
597	16991	r1BIRt	r1 part of basointermediate reticular formation	11	15564	[193 80 131]
598	16992	r1SubC	nucleus subcoeruleus, r1 part	11	15564	[ 56 116 190]
599	16998	r1DR	r1 part of dorsal raphe nucleus	11	15564	[227 213 17]
600	16999	Sph	sphenoid nucleus	11	15564	[159 245 15]
601	17001	DTgC	core part of DTg	12	15564	[ 60 36 153]
602	17002	DTgS	shell part of DTg	12	15564	[199 17 109]
603	17005	IPA	apical interpeduncular nucleus	11	15564	[70 90 62]
604	17006	Rbd	rhabdoid interpeduncular nucleus	11	15564	[ 77 245 96]
605	17007	VTg	ventral tegmental nucleus	11	15564	[ 54 197 25]
606	17008	ATg	anterior tegmental nucleus	11	15564	[ 11 208 242]
607	17009	PTg	posterior tegmental nucleus	11	15564	[238 199 97]
608	17010	r1PMnR	r1 part of paramedian raphe nucleus	11	15564	[ 82 110 52]
609	17011	r1MnR	r1 part of median raphe nucleus	11	15564	[ 17 128 177]
610	17012	r1BMRt	r1 part of basomedial reticular formation	11	15564	[ 46 194 186]
611	17014	IPR	rostral interpeduncular nucleus	11	15564	[153 51 157]
612	17018	IPC	caudal interpeduncular nucleus	11	15564	[222 86 151]
613	17022	r1F	r1 floor plate	5	15564	[224 72 29]
614	17024	r2R	r2 roof plate	5	15564	[111 154 25]
615	17025	r2A	r2 alar plate	5	15564	[225 162 14]
616	17029	r2DC	r2 part of dorsal cochlear nucleus	11	15564	[249 176 49]
617	17030	r2AVC	r2 part of anteroventral cochlear nucleus	11	15564	[246 141 16]
618	17034	r2SuVe	r2 part of superior vestibular nucleus	11	15564	[ 76 54 108]
619	17039	r2Pr5	r2 part of principal trigeminal sensory nucleus	11	15564	[ 22 146 135]
620	17040	r2-5Tr	r2 part of trigeminal transition zone	11	15564	[113 145 191]
621	17041	r2DPCRt	r2 part of dorsal parvicellular reticular formation	11	15564	[103 157 180]
622	17045	r2-5M	r2 part of the trigeminal motor nucleus	11	15564	[206 102 174]
623	17046	5Te	temporal muscle trigeminal motor cell group	12	15564	[182 187 56]
624	17047	5Ma	masseter muscle trigeminal motor cell group	12	15564	[218 67 195]
625	17048	5Pt	pterigoid muscle trigeminal motor cell group	12	15564	[244 73 47]
626	17049	5TT	temporotympanic muscle trigeminal motor cell group	12	15564	[ 73 195 189]
627	17050	r2LimCG	r2 liminal central gray	11	15564	[ 63 221 244]
628	17051	r2VPCRt	r2 part of the ventral parvicellular reticular formation	11	15564	[169 132 79]
629	17053	r2B	r2 basal plate	5	15564	[ 86 56 230]
630	17059	r2SubC	r2 part of nucleus subcoeruleus	11	15564	[123 99 240]
631	17060	r2MPL	r2 part of medial paralemniscal nucleus	11	15564	[145 36 56]
632	17062	r2BLRt	r2 part of basolateral reticular formation	11	15564	[172 152 223]
633	17064	r2VLL	r2 part of ventral lateral lemniscal nucleus	11	15564	[197 123 214]
634	17070	r2BICG	r2 part of central gray	11	15564	[177 136 53]
635	17073	r2BIIZ	r2 part of BI intermediate zone	11	15564	[ 92 160 225]
636	17075	DMTg	dorsomedial tegmental nucleus	11	15564	[ 38 210 96]
637	17076	r2BIRt	r2 part of basointermediate reticular formation	11	15564	[226 219 97]
638	17077	r2PMnR	r2 part of paramedian raphe nucleus	11	15564	[251 138 125]
639	17083	PDTg	posterodorsal tegmental nucleus	11	15564	[181 220 70]
640	17084	Inc	nucleus incertus	11	15564	[132 43 31]
641	17086	r2BMRt	r2 part of basomedial reticular formation	11	15564	[116 109 121]
642	17087	r2PPnR	r2 part of prepontine raphe nucleus	11	15564	[241 44 226]
643	17088	r2MnR	r2 part of median raphe nucleus	11	15564	[134 79 99]
644	17090	RMTg	rostromedial tegmental nucleus	11	15564	[114 207 186]
645	17091	r2F	r2 floor plate	5	15564	[140 206 89]
646	17094	r3R	r3 roof plate	5	15564	[108 110 55]
647	17095	r3A	r3 alar plate	5	15564	[ 33 227 25]
648	17099	r3DC	r3 part of dorsal cochlear nucleus	11	15564	[ 79 47 202]
649	17100	r3AVC	r3 part of anteroventral cochlear nucleus	11	15564	[ 45 165 204]
650	17104	r3LVe	r3 part of lateral vestibular nucleus	11	15564	[ 32 177 185]
651	17105	r3MVeMC	r3 part of magnocellular medial vestibular nucleus	11	15564	[134 122 246]
652	17106	r3MVePC	r3 part of parvicellular medial vestibular nucleus	11	15564	[146 91 217]
653	17110	r3Sp5O	r3 part of spinal trigeminal sensory column, oral part	11	15564	[ 32 121 223]
654	17111	r3-5Tr	r3 part of trigeminal transition zone	11	15564	[ 13 159 253]
655	17112	r3DPCRt	r3 part of dorsal parvicellular reticular formation	11	15564	[161 234 209]
656	17116	r3-5M	r3 part of the trigeminal motor nucleus	11	15564	[154 189 217]
657	17117	5ADi	anterior digastric muscle trigeminal motor cell group	12	15564	[199 119 171]
658	17118	r3VLL	r3 part of ventral lateral lemniscal nucleus	11	15564	[142 76 110]
659	17119	r3MPL	r3 part of medial paralemniscal nucleus	11	15564	[178 243 204]
660	17121	r3VPCRt	r3 part of ventral parvicellular reticular formation	11	15564	[153 133 142]
661	17122	r3LimCG	r3 liminal central gray	11	15564	[190 73 246]
662	17123	r3B	r3 basal plate	5	15564	[ 26 12 254]
663	17128	r3BLCG	r3 part of basolateral central gray	11	15564	[ 86 61 237]
664	17130	r3BLRt	r3 part of basolateral reticular formation	11	15564	[133 146 138]
665	17136	r3CGA	r3 part of central gray nucleus alpha	11	15564	[112 58 170]
666	17137	r3CGB	r3 part of central gray nucleus beta	11	15564	[202 111 134]
667	17138	r3BIIZ	r3 part of BI intermediate zone	11	15564	[119 246 204]
668	17140	r3BIRt	r3 part of basointermediate reticular formation	11	15564	[243 105 152]
669	17142	r3LPn	r3 part of lateral pontine nuclei	11	15564	[174 243 80]
670	17149	r3PnR	r3 pontine raphe nucleus	11	15564	[234 205 59]
671	17150	r3RtTgS	r3 part of reticulotegmental nucleus, shell portion	11	15564	[192 96 116]
672	17151	r3RtTgC	r3 part of reticulotegmental nucleus, core portion	11	15564	[124 194 11]
673	17152	r3BMRt	r3 part of basomedial reticular formation	11	15564	[ 92 159 200]
674	17154	r3MPn	r3 part of medial pontine nuclei	11	15564	[ 48 172 190]
675	17155	r3F	r3 floor plate	5	15564	[250 132 43]
676	17157	r4R	r4 roof plate	5	15564	[157 154 227]
677	17158	r4A	r4 alar plate	5	15564	[41 43 47]
678	17162	r4DC	r4 part of dorsal cochlear nucleus	11	15564	[155 160 66]
679	17163	r4PVC	r4 part of posteroventral cochlear nucleus	11	15564	[128 121 206]
680	17167	r4LVe	r4 part of lateral vestibular nucleus	11	15564	[195 50 140]
681	17168	r4MVeMC	r4 part of magnocellular medial vestibular nucleus	11	15564	[ 84 123 159]
682	17169	r4MVePC	r4 part of parvocellular medial vestibular nucleus	11	15564	[195 29 241]
683	17173	r4Sp5O	r4 part of descending trigeminal sensory nucleus, oral part	11	15564	[ 92 60 115]
684	17175	r4DPCRt	r4 part of dorsal parvicellular reticular formation	11	15564	[ 33 85 214]
685	17179	r4LimCG	r4 liminal central gray	11	15564	[ 60 49 231]
686	17180	r4VPCRt	r4 part of ventral parvicellular reticular formation	11	15564	[ 53 254 85]
687	17182	r4B	r4 basal plate	5	15564	[123 116 237]
688	17187	r4BLIZ	r4 part of basolateral intermediate zone	11	15564	[ 32 32 231]
689	17189	EVe	efferent vestibular nucleus	11	15564	[ 73 155 141]
690	17190	SGe	supragenual nucleus	11	15564	[157 93 108]
691	17191	r4BLRt	r4 part of basolateral reticular formation	11	15564	[ 81 64 225]
692	17193	r4VLL	r4 part of ventral lateral lemniscal nucleus	11	15564	[ 78 104 122]
693	17194	r4MPL	r4 part of medial paralemniscal nucleus	11	15564	[198 90 37]
694	17200	r4BIIZ	r4 part of basointermediate intermediate zone	11	15564	[ 40 97 226]
695	17201	r4CGA	r4 part of central gray nucleus alpha	11	15564	[164 136 43]
696	17202	r4CGB	r4 part of central gray nucleus beta	11	15564	[219 32 194]
697	17204	r4BIRt	r4 part of basointermediate reticular formation	11	15564	[222 35 84]
698	17206	r4LPn	r4 part of lateral pontine nuclei	11	15564	[ 15 189 220]
699	17213	r4RtTgS	r4 part of reticulotegmental nucleus, shell portion	11	15564	[116 78 17]
700	17214	r4RtTgC	r4 part of reticulotegmental nucleus, core portion	11	15564	[250 222 75]
701	17215	r4BMRt	r4 part of basomedial reticular formation	11	15564	[100 82 74]
702	17216	r4PnR	r4 part of pontine raphe cell population	11	15564	[251 90 182]
703	17218	r4MPn	r4 part of medial pontine nuclei	11	15564	[ 55 106 145]
704	17219	r4F	r4 floor plate	5	15564	[210 131 67]
705	17222	r5R	r5 roof plate	5	15564	[204 90 181]
706	17223	r5A	r5 alar plate	5	15564	[246 198 97]
707	17227	r5DC	r5 part of dorsal cochlear nucleus	11	15564	[171 58 39]
708	17228	r5PVC	r5 part of posteroventral cochlear nucleus	11	15564	[254 76 83]
709	17232	r5SpVe	r5 part of spinal vestibular nucleus	11	15564	[122 222 181]
710	17233	r5MVeMC	r5 part of magnocellular medial vestibular nucleus	11	15564	[ 65 188 235]
711	17234	r5MVePC	r5 part of parvocellular medial vestibular nucleus	11	15564	[179 108 81]
712	17238	r5Sp5O	r5 part of the oral Sp5 subnucleus	11	15564	[ 95 57 105]
713	17240	r5Sol	r5 (gustatory) part of solitary complex	11	15564	[194 242 210]
714	17241	r5DPCRt	r5 part of dorsal parvicellular reticular formation	11	15564	[126 186 85]
715	17245	r5LimCG	r5 liminal central gray	11	15564	[ 99 180 77]
716	17246	r5VPCRt	r5 part of ventral parvicellular reticular formation	11	15564	[203 57 91]
717	17247	r5A5	r5 part of A5 noradrenergic cell group	11	15564	[109 91 94]
718	17248	SS	superior salivatory parasympathetic nucleus	11	15564	[ 30 28 151]
719	17249	CAT	nucleus of the central acoustic tract	11	15564	[165 75 232]
720	17250	r5B	r5 basal plate	5	15564	[ 26 202 247]
721	17255	r5BLIZ	r5 part of basolateral intermediate zone	11	15564	[190 40 151]
722	17257	r5BLRt	r5 part of basolateral reticular formation	11	15564	[247 185 159]
723	17259	r5VLL	r5 part of ventral lateral lemniscal nucleus	11	15564	[117 101 239]
724	17260	DPeO	dorsal periolivary nucleus	11	15564	[ 20 108 203]
725	17261	LSO	lateral superior olive	11	15564	[245 36 233]
726	17262	MSO	medial superior olive	11	15564	[126 114 60]
727	17263	RPeO	rostral periolivary nucleus	11	15564	[191 15 42]
728	17264	SPeO	superior periolivary nucleus	11	15564	[220 161 51]
729	17265	VLPeO	ventrolateral periolivary nucleus	11	15564	[246 238 235]
730	17270	r5BIIZ	r5 part of basointermediate intermediate zone	11	15564	[154 114 148]
731	17272	r5BIRt	r5 part of basointermediate reticular formation	11	15564	[ 74 118 131]
732	17274	LTz	lateral trapezoid nucleus	11	15564	[ 20 83 218]
733	17279	6M	abducens motor nucleus	11	15564	[212 171 196]
734	17281	Pa6	para-abducens nucleus	11	15564	[ 60 208 149]
735	17282	RPnRt	retropontine reticular area	11	15564	[207 244 94]
736	17283	r5BMRt	r5 part of basomedial reticular formation	11	15564	[ 30 172 244]
737	17284	r5RM	nucleus raphe magnus, r5 part	11	15564	[128 34 28]
738	17287	MTz	medial trapezoid nucleus	11	15564	[222 92 224]
739	17289	r5F	r5 floor plate	5	15564	[ 68 230 134]
740	17291	r6R	r6 roof plate	5	15564	[30 41 23]
741	17292	r6A	r6 alar plate	5	15564	[ 43 218 96]
742	17296	r6DC	r6 part of dorsal cochlear nucleus	11	15564	[99 75 51]
743	17297	r6PVC	r6 part of posteroventral cochlear nucleus	11	15564	[125 210 120]
744	17301	r6SpVe	r6 part of spinal vestibular nucleus	11	15564	[142 25 111]
745	17302	r6MVeMC	r6 part of magnocellular medial vestibular nucleus	11	15564	[ 67 181 133]
746	17303	r6MVePC	r6 part of parvocellular medial vestibular nucleus	11	15564	[199 147 30]
747	17307	r6Sp5O	r6 part of spinal trigeminal nucleus, pars oralis	11	15564	[ 80 225 79]
748	17308	r6-5Tr	r6 part of trigeminal transition zone	11	15564	[143 89 209]
749	17309	r6Sol	r6 (gustatory) part of solitary complex	11	15564	[111 164 200]
750	17310	r6DPCRt	r6 part of dorsal parvicellular reticular formation	11	15564	[210 50 212]
751	17314	r6LimCG	r6 liminal central gray	11	15564	[ 59 162 38]
752	17315	r6VPCRt	r6 part of ventral parvicellular reticular formation	11	15564	[135 115 87]
753	17317	7M	facial motor nucleus	11	15564	[132 246 159]
754	17318	r6B	r6 basal plate	5	15564	[244 105 180]
755	17323	r6BLIZ	r6 part of basolateral intermediate zone	11	15564	[243 234 46]
756	17325	r6BLRt	r6 part of the basolateral reticular formation	11	15564	[208 231 130]
757	17327	RTZ	retrotrapezoid nucleus	11	15564	[43 63 46]
758	17332	r6BIIZ	r6 part of basointermediate intermediate zone	11	15564	[58 38 84]
759	17334	r6BIRt	r6 part of basointermediate reticular formation	11	15564	[151 91 214]
760	17336	r6PGi	r6 part of paragigantocellular nucleus	11	15564	[116 147 127]
761	17337	r6RVM	r6 part of rostral ventromedial reticular area	11	15564	[ 76 133 73]
762	17342	r6Pr	r6 part of nucleus prepositus	11	15564	[189 239 199]
763	17344	r6BMRt	r6 part of basomedial reticular formation	11	15564	[155 192 111]
764	17345	r6RM	raphe magnus nucleus, r6 part	11	15564	[ 43 190 215]
765	17346	r6Gi	r6 part of gigantocellular reticular area	11	15564	[201 159 202]
766	17347	r6GiV	r6 part of ventral gigangocellular reticular area	11	15564	[193 110 31]
767	17350	r6PPy	r6 part of parapyramidal nucleus	11	15564	[121 71 228]
768	17351	r6F	r6 floor plate	5	15564	[ 30 103 114]
769	17354	r7R	r7 roof plate	5	15564	[205 58 215]
770	17355	r7A	r7 alar plate	5	15564	[93 28 36]
771	17359	r7DC	r7 part of the dorsal cochlear nucleus	11	15564	[236 130 216]
772	17360	r7PVC	r7 part of the posteroventral cochlear nucleus	11	15564	[172 249 206]
773	17364	r7SpVe	r7 part of spinal vestibular nucleus	11	15564	[203 179 107]
774	17365	r7MVePC	r7 part of parvocellular medial vestibular nucleus	11	15564	[ 62 205 70]
775	17369	r7Sp5I	r7 part of spinal trigeminal nucleus, interpolar part	11	15564	[180 126 149]
776	17370	r7-5Tr	r7 part of trigeminal transition zone	11	15564	[247 49 76]
777	17371	r7Sol	r7 (gustatory) part of solitary complex	11	15564	[ 68 223 94]
778	17372	r7DPCRt	r7 part of dorsal parvicellular reticular formation	11	15564	[ 21 155 212]
779	17376	r7LimCG	r7 liminal central gray	11	15564	[234 195 25]
780	17378	r7Amb	r7 portion of ambiguous motor nucleus	11	15564	[149 94 91]
781	17379	r7VPCRt	r7 part of ventral parvicellular reticular formation	11	15564	[33 46 50]
782	17380	r7B	r7 basal plate	5	15564	[193 213 49]
783	17385	r7BLIZ	r7 part of the basolateral intermediate zone	11	15564	[174 228 247]
784	17387	r7BLRt	r7 part of basolateral reticular formation	11	15564	[ 29 205 49]
785	17389	RVL	rostral ventrolateral reticular area	11	15564	[226 240 88]
786	17394	r7BIIZ	r7 part of the basointermediate intermediate zone	11	15564	[220 158 148]
787	17396	r7BIRt	r7 part of the basointermediate reticular formation	11	15564	[ 83 161 69]
788	17398	r7PGi	r7 part of paragigantocellular nucleus	11	15564	[111 182 162]
789	17399	r7RVM	r7 part of rostral ventromedial reticular area	11	15564	[168 44 49]
790	17404	r7Pr	r7 part of nucleus prepositus	11	15564	[ 56 156 215]
791	17405	r7-12M	r7 portion of the hypoglossal motor nucleus	11	15564	[108 146 208]
792	17406	r7Ro	r7 part of the nucleus of Roller	11	15564	[155 82 126]
793	17409	r7BMRt	r7 part of basomedial reticular formation	11	15564	[123 170 116]
794	17410	r7Gi	r7 part of gigantocellular reticular area	11	15564	[68 77 68]
795	17411	r7GiV	r7 part of ventral gigangocellular reticular area	11	15564	[185 153 32]
796	17413	r7-RP	r7 raphe pallidus cell population	11	15564	[29 22 96]
797	17414	r7PPy	r7 part of parapyramidal nucleus	11	15564	[155 237 186]
798	17415	r7F	r7 floor plate	5	15564	[242 165 151]
799	17417	r8R	r8 roof plate	5	15564	[222 105 204]
800	17418	r8A	r8 alar plate	5	15564	[84 20 61]
801	17422	r8SpVe	r8 part of spinal vestibular nucleus	11	15564	[152 122 116]
802	17423	r8MVePC	r8 part of parvocellular medial vestibular nucleus	11	15564	[ 65 115 112]
803	17427	r8Sp5I	r8 part of spinal trigeminal nucleus, interpolar part	11	15564	[137 100 196]
804	17429	r8Sol	r8 (gustatory) part of solitary complex	11	15564	[ 18 112 229]
805	17430	r8DPCRt	r8 part of dorsal parvicellular reticular formation	11	15564	[ 52 237 51]
806	17434	r8VPCRt	r8 part of ventral parvicellular reticular formation	11	15564	[188 73 66]
807	17435	r8-10M	r8 portion of vagal motor nucleus	11	15564	[202 233 17]
808	17436	r8Amb	r8 portion of ambiguous motor nucleus	11	15564	[244 155 145]
809	17437	r8B	r8 basal plate	5	15564	[ 19 13 247]
810	17442	r8-BLIZ	r8 part of basolateral intermediate zone	11	15564	[193 48 126]
811	17444	r8BLRt	r8 part of basolateral reticular formation	11	15564	[238 12 194]
812	17446	r8LRt	r8 part of lateral reticular nucleus	11	15564	[251 112 248]
813	17447	r8LRtPC	parvocellular part of r8LRt	11	15564	[ 81 87 189]
814	17448	r8Li	r8 part of linear nucleus	11	15564	[221 154 247]
815	17453	r8BIIZ	r8 part of basointermediate intermediate zone	11	15564	[ 55 244 21]
816	17454	r8IS	r8 part of nucleus intercalatus Staderini	11	15564	[241 245 46]
817	17456	r8BIRt	r8 part of basointermediate reticular formation	11	15564	[131 220 163]
818	17459	r8PGi	r8 part of the paragigantocellular nucleus	11	15564	[128 168 190]
819	17464	r8Pr	r8 part of nucleus prepositus	11	15564	[15 34 99]
820	17465	r8-12M	r8 portion of the hypoglossal motor nucleus	11	15564	[103 105 235]
821	17466	r8Ro	r8 part of nucleus of Roller	11	15564	[183 227 118]
822	17469	r8BMRt	r8 part of basomedial reticular formation	11	15564	[ 79 209 230]
823	17470	r8Gi	r8 part of gigantocellular reticular area	11	15564	[ 82 236 96]
824	17471	r8GiV	r8 part of ventral gigangocellular reticular area	11	15564	[ 78 52 132]
825	17473	r8-RP	r8 raphe pallidus cell population	11	15564	[161 61 177]
826	17474	r8-IO	r8 part of inferior olive	11	15564	[ 88 147 177]
827	17475	r8F	r8 floor plate	5	15564	[246 120 250]
828	17477	r9R	r9 roof plate	5	15564	[128 50 19]
829	17478	r9A	r9 alar plate	5	15564	[108 115 227]
830	17482	r9SpVe	r9 part of spinal vestibular nucleus	11	15564	[116 252 160]
831	17483	r9MVePC	r9 part of parvocellular medial vestibular nucleus	11	15564	[179 131 225]
832	17484	r9ECu	r9 part of external cuneate nucleus	11	15564	[100 147 119]
833	17488	r9Sp5I	r9 part of spinal trigeminal nucleus, interpolar part	11	15564	[253 213 99]
834	17489	r9-5Tr	r9 part of trigeminal transition zone	11	15564	[246 105 81]
835	17490	r9Sol	r9 (gustatory) part of solitary complex	11	15564	[130 244 251]
836	17491	r9Gr	r9 part of nucleus gracilis	11	15564	[ 96 135 19]
837	17493	r9DPCRt	r9 part of dorsal parvicellular reticular formation	11	15564	[239 17 34]
838	17497	r9VPCRt	r9 part of ventral parvicellular reticular formation	11	15564	[189 75 84]
839	17498	r9-10M	r9 portion of vagal motor nucleus (postmigratory)	11	15564	[223 65 147]
840	17499	r9Amb	r9 portion of ambiguous motor nucleus (postmigratory)	11	15564	[188 92 197]
841	17500	r9B	r9 basal plate	5	15564	[101 183 28]
842	17505	r9BLIZ	r9 part of the basolateral intermediate zone	11	15564	[ 52 101 142]
843	17507	r9BLRt	r9 part of the basolateral reticular formation	11	15564	[169 145 185]
844	17509	r9LRt	r9 part of the lateral reticular nucleus	11	15564	[143 208 208]
845	17510	r9LRtPC	parvocellular part of the r9LRt	11	15564	[142 174 31]
846	17511	r9Li	r9 part of linear nucleus	11	15564	[220 158 240]
847	17516	r9BIIZ	r9 part of basointermediate intermediate zone	11	15564	[ 33 163 32]
848	17517	r9IS	r9 part of nucleus intercalatus Staderini	11	15564	[ 72 141 208]
849	17519	r9BIRt	r9 part of basointermediate reticular formation	11	15564	[131 249 131]
850	17521	r9PGi	r9 part of paragigantocellular nucleus	11	15564	[ 84 192 117]
851	17527	r9-12M	r9 portion of the hypoglossal motor nucleus	11	15564	[ 15 84 220]
852	17528	r9Ro	r9 part of nucleus of Roller	11	15564	[192 15 16]
853	17531	r9BMRt	r9 part of basomedial reticular formation	11	15564	[126 232 104]
854	17532	r9Gi	r9 part of gigantocellular reticular area	11	15564	[149 234 190]
855	17533	r9GiV	r9 part of ventral gigangocellular reticular area	11	15564	[ 54 63 143]
856	17535	r9-RP	r9 raphe pallidus cell population	11	15564	[243 101 94]
857	17536	r9-IO	r9 part of the inferior olive	11	15564	[177 148 187]
858	17537	r9F	r9 floor plate	5	15564	[221 54 87]
859	17540	r10A	r10 alar plate	5	15564	[ 92 173 80]
860	17544	r10SpVe	r10 part of spinal vestibular nucleus	11	15564	[ 83 227 122]
861	17546	r10ECu	r10 part of external cuneate nucleus	11	15564	[ 88 10 195]
862	17550	r10Sp5C	r10 part of spinal trigeminal nucleus, caudal part	11	15564	[156 16 214]
863	17551	r10-5Tr	r10 part of trigeminal transition zone	11	15564	[ 11 83 235]
864	17552	r10Sol	r10 part of solitary complex	11	15564	[133 109 130]
865	17553	r10Gr	r10 part of nucleus gracilis	11	15564	[203 196 138]
866	17555	r10DPCRt	r10 part of dorsal parvicellular reticular formation	11	15564	[194 123 130]
867	17559	r10VPCRt	r10 part of ventral parvicellular reticular formation	11	15564	[236 73 58]
868	17560	r10-10M	r10 part of vagal motor nucleus	11	15564	[210 198 114]
869	17562	r10B	r10 basal plate	5	15564	[249 42 218]
870	17567	r10BLIZ	r10 part of the basolateral intermediate zone	11	15564	[239 199 91]
871	17569	r10BLRt	r10 part of basolateral reticular formation	11	15564	[102 59 186]
872	17575	r10IS	r10 part of nucleus intercalatus Staderini	11	15564	[168 55 19]
873	17576	r10BIIZ	r10 part of basointermediate intermediate zone	11	15564	[123 92 100]
874	17578	r10-11M	r10 part of accessory motor nucleus	11	15564	[165 126 247]
875	17579	r10BIRt	r10 part of basointermediate reticular formation	11	15564	[171 232 67]
876	17585	r10-12M	r10 portion of the hypoglossal motor nucleus	11	15564	[196 129 253]
877	17586	r10Ro	r10 part of nucleus of Roller	11	15564	[236 12 47]
878	17589	r10BMRt	r10 part of basomedial reticular formation	11	15564	[112 214 115]
879	17590	r10Gi	r10 part of gigantocellular reticular area	11	15564	[148 39 185]
880	17591	r10GiV	r10 part of ventral gigangocellular reticular area	11	15564	[ 60 147 92]
881	17593	r10-RP	r10 raphe pallidus cell population	11	15564	[113 55 48]
882	17594	r10-IO	r10 part of the inferior olive	11	15564	[ 57 218 16]
883	17595	r10F	r10 floor plate	5	15564	[206 34 65]
884	17598	r11A	r11 alar plate	5	15564	[168 147 52]
885	17602	r11ECu	r11 part of the external uneate nucleus	11	15564	[ 44 43 204]
886	17606	r11Sp5C	r11 part of spinal trigeminal nucleus, caudal part	11	15564	[ 86 124 89]
887	17607	r11-5Tr	r11 part of trigeminal transition zone	11	15564	[180 68 89]
888	17608	r11Sol	r11 part of solitary complex	11	15564	[233 160 35]
889	17609	r11Gr	r11 part of nucleus gracilis	11	15564	[163 86 212]
890	17615	r11LimCG	r11 liminal central gray	11	15564	[150 45 180]
891	17616	r11VPCRt	r11 part of ventral parvicellular reticular formation	11	15564	[ 71 244 198]
892	17617	r11-10M	r11 part of vagal motor nucleus (postmigratory)	11	15564	[161 85 34]
893	17620	r11B	r11 basal plate	5	15564	[173 160 44]
894	17625	r11BLIZ	r11 part of the basolateral intermediate zone	11	15564	[224 50 21]
895	17627	r11BLRt	r11 part of basolateral reticular formation	11	15564	[ 71 201 168]
896	17633	r11BIIZ	r11 part of basointermediate intermediate zone	11	15564	[ 14 148 165]
897	17636	r11BIRt	r11 part of basointermediate reticular formation	11	15564	[159 108 92]
898	17642	r11-12M	r11 part of hypoglossal motor nucleus	11	15564	[ 38 245 248]
899	17644	r11-RO	r11 part of nucleus raphe obscurus	11	15564	[ 73 244 210]
900	17645	r11BMRt	r11 part of basomedial reticular formation	11	15564	[123 110 200]
901	17646	r11Gi	r11 part of gigantocellular reticular area	11	15564	[171 148 184]
902	17647	r11GiV	r11 part of ventral gigangocellular reticular area	11	15564	[102 79 69]
903	17649	r11-RP	r11 part of nucleus raphe pallidus	11	15564	[133 14 246]
904	17650	r11F	r11 floor plate	5	15564	[ 22 177 75]
905	17653	SpA	SpC alar plate	5	15564	[213 58 35]
906	17658	AM10Sp	alar medial part of Rexed's layer 10	11	15564	[188 170 12]
907	17660	4SpCC	cornucommissural part of Rexed's layer 4	11	15564	[182 47 151]
908	17661	IB	internal basilar (cervical) nucleus	11	15564	[120 222 84]
909	17692	SpB	SpC basal plate (anterior horn)	5	15564	[117 52 98]
910	17697	BL10Sp	basal lateral part of Rexed's layer 10	11	15564	[248 217 49]
911	17714	BI10Sp	basal intermediate part of Rexed's layer 10	11	15564	[213 145 200]
912	17729	BM10Sp	basal medial part of Rexed's layer 10	11	15564	[ 43 93 127]
913	17733	SpBMs	superficial stratum of SpBM	10	15564	[230 113 33]
914	17734	SpF	SpC floor plate	5	15564	[141 231 82]
915	111220572	PaS-6a	layer 6a of PaS	12	15564	[163 133 57]
916	111220574	PaS-6b	layer 6b of PaS	12	15564	[129 200 200]
917	112892275	Fcs	superficial stratum of the Fc	10	15564	[103 106 15]
918	112892283	m1PBP	m1 part of parabrachialis pigmentosus	11	15564	[168 198 125]
919	112892315	isDRW	lateral wings of the dorsal raphe nucleus	11	15564	[ 27 38 102]
920	114403731	r11Ro	r11 part of nucleus of Roller	10	15564	[ 49 148 62]
921	124372424	r1Y	r1 part of vestibular nucleus Y	11	15564	[237 211 70]
922	124372440	r1LPn	r1 part of lateral pontine nuclei	11	15564	[242 253 101]
923	124372444	MnIPR	median part of IPR	11	15564	[ 45 183 113]
924	124372448	MnIPC	median part of IPC	11	15564	[151 31 92]
925	124372452	r2Y	r2 part of vestibular nucleus Y	11	15564	[178 164 174]
926	124372464	r2LPn	r2 part of lateral pontine nuclei	11	15564	[167 162 140]
927	126531028	MnIPPr	median part of IPPr	11	15564	[159 126 108]
928	127201621	r11-IO	r11 part of the inferior olive	11	15564	[88 36 89]

## Sheet: ABA-P56
	Region	RegionAbbr	RegionName	Level	Parent	RGB
0	15570	POR	preoptic roof plate	5	15564	[113 168 117]
1	15576	POA	preoptic alar plate	5	15564	[246 103 203]
2	15582	VOLT	vascular organ of the lamina terminalis	11	15564	[149 236 27]
3	15584	MnPOI	median preoptic nucleus, intermediate part	11	15564	[ 14 213 200]
4	15586	MnPOS	median preoptic nucleus, superficial part	11	15564	[249 205 123]
5	15591	AVPe	anteroventral periventricular preoptic nucleus	11	15564	[ 38 166 45]
6	15592	DSPO	dorsal septopreoptic nucleus	11	15564	[137 111 117]
7	15594	PS	parastrial preoptic nucleus	11	15564	[121 149 22]
8	15595	DMPAi	dorsomedial preoptic area, intermediate part	11	15564	[159 161 241]
9	15596	LPO1	lateral preoptic area, PO1 part	11	15564	[ 98 117 180]
10	15598	DMPAs	dorsomedial preoptic area, superficial part	11	15564	[173 174 61]
11	15603	MPOPe	medial preoptic periventricular stratum	11	15564	[138 99 149]
12	15605	MPOL	lateral part of MPO	12	15564	[252 35 61]
13	15606	MPOM	medial part of MPO	12	15564	[170 72 124]
14	15607	MPOC	central part of MPO	12	15564	[ 48 37 170]
15	15609	LPO2	lateral preoptic nucleus, PO2 part	11	15564	[ 58 100 211]
16	15611	VMPO	ventromedial preoptic nucleus	11	15564	[215 33 249]
17	15612	VLPO	ventrolateral preoptic nucleus	11	15564	[249 158 191]
18	15618	StHy	striohypothalamic nucleus	11	15564	[79 62 82]
19	15619	POHA	preopto-hypothalamic area	11	15564	[ 87 111 39]
20	15621	ESO	episupraoptic nucleus	11	15564	[148 119 138]
21	15623	THyA	alar part of terminal hypothalamus	5	15564	[151 237 88]
22	15628	RPa	rostral paraventricular nucleus	11	15564	[ 42 185 80]
23	15630	LA	lateral anterior hypothalamic nucleus	11	15564	[153 14 213]
24	15631	TSM	terminal nucleus of the stria medullaris	11	15564	[176 76 190]
25	15633	SO	supraoptic nucleus	11	15564	[111 151 155]
26	15657	SCHp	suprachiasmatic nucleus, periventricular part	11	15564	[ 64 243 119]
27	15658	TSPa	terminal subparaventricular area	11	15564	[181 82 209]
28	15660	SCH	suprachiasmatic nucleus	11	15564	[225 152 226]
29	15662	AH	anterior hypothalamic nucleus	11	15564	[187 132 244]
30	15664	SCHs	shell of SCH	12	15564	[113 158 22]
31	15666	THyB	basal part of terminal hypothalamus	5	15564	[171 81 161]
32	15671	ABasp	periventricular part of the anterobasal nucleus	11	15564	[ 68 83 149]
33	15672	VMHp	periventricular domain associated to VMH	11	15564	[150 170 169]
34	15674	ABasc	core part of the anterobasal nucleus	11	15564	[229 100 116]
35	15675	VMH	ventromedial hypothalamic nucleus	11	15564	[207 182 34]
36	15676	VMHdm	dorsomedial part of VMH	12	15564	[184 254 46]
37	15677	VMHce	central part of VMH	12	15564	[ 49 160 40]
38	15678	VMHvl	ventrolateral part of VMH	12	15564	[207 149 109]
39	15679	VMHsh	shell of VMH	12	15564	[180 121 186]
40	15681	ABass	shell part of the anterobasal nucleus	11	15564	[249 219 12]
41	15682	SbO	suboptic nucleus	11	15564	[188 52 137]
42	15683	Tu	tuberal nucleus	11	15564	[ 58 14 204]
43	15688	Arcp	periventricular part of the arcuate nucleus	11	15564	[ 94 237 182]
44	15689	ME	median eminence	11	15564	[ 50 162 151]
45	15690	Inf	infundibulum	11	15564	[238 160 141]
46	15691	NHy	neurohypophysis	11	15564	[188 86 107]
47	15692	T-DMHp	periventricular domain associated to T-DMH	11	15564	[ 55 241 191]
48	15695	T-DMHc	core of T-DMH	12	15564	[65 72 38]
49	15696	T-DMHs	shell of T-DMH	12	15564	[ 86 180 102]
50	15697	Arci	intermediate part of the arcuate nucleus	11	15564	[ 16 26 176]
51	15698	PMV	ventral premammillary nucleus (migrated)	11	15564	[141 229 252]
52	15700	Arcs	superficial part of arcuate nucleus	11	15564	[172 74 15]
53	15701	MTu	medial tuberal nucleus	11	15564	[140 103 154]
54	15709	VTMi	ventral tuberomammillary nucleus, intermediate part (histaminergic)	11	15564	[164 223 77]
55	15711	VTMs	ventral tuberomammillary nucleus, superficial part (histaminergic)	11	15564	[ 55 243 178]
56	15717	PPeM	periventricular perimammillary area	11	15564	[242 189 72]
57	15719	PMD	dorsal premammillary nucleus	11	15564	[136 25 60]
58	15721	Te	terete nucleus	11	15564	[101 123 124]
59	15727	MnM	median mammillary nucleus	11	15564	[221 38 136]
60	15730	MMm	medial part of MM	12	15564	[185 107 148]
61	15731	MMl	lateral part of MM	12	15564	[ 71 129 97]
62	15734	LM	lateral mammillary nucleus	11	15564	[197 193 231]
63	15735	VTMm	ventral tuberomammillary nucleus, migrated part (histaminergic)	11	15564	[145 153 245]
64	15736	THyF	floor of terminal hypothalamus	5	15564	[69 34 22]
65	15740	TelR	roof plate of evaginated telencephalic vesicle	5	15564	[174 202 79]
66	15750	TelA	alar plate of evaginated telencephalic vesicle	5	15564	[ 25 128 249]
67	15758	MnSC	median supracommissural nucleus	11	15564	[ 92 245 66]
68	15760	LSIV	lateral septal nucleus, intermedio-ventral part	11	15564	[240 205 164]
69	15761	SHy	septohypothalamic nucleus	11	15564	[ 81 217 161]
70	15763	VDB	vertical nucleus of the diagonal band	11	15564	[ 95 46 250]
71	15764	MS	medial septal nucleus	11	15564	[131 166 100]
72	15769	LSIp	lateral septal nucleus, intermediate part, periventricular	11	15564	[211 56 135]
73	15771	LSII	lateral septal nucleus, intermedio-intermediate part	11	15564	[ 33 221 248]
74	15772	Ld	lambdoid septal zone	11	15564	[232 199 91]
75	15778	LSD	lateral septal nucleus, dorsal part	11	15564	[109 66 66]
76	15779	TS	triangular septal nucleus	11	15564	[187 12 198]
77	15780	SFi	septofimbrial nucleus	11	15564	[ 29 31 174]
78	15782	LSID	lateral septal nucleus, intermedio-dorsal part	11	15564	[113 146 220]
79	15784	PaSe	paraseptal subpallium	7	15564	[76 42 36]
80	15790	BSTMv	nucleus of the stria terminalis, medial division, ventral part	12	15564	[ 74 121 177]
81	15791	BSTMa	nucleus of the stria terminalis, medial division, anterior part	12	15564	[ 79 103 86]
82	15793	SIBT	substantia innominata/basal nucleus, transitional part	11	15564	[ 23 180 200]
83	15794	BAC	bed nucleus of the anterior commissure	11	15564	[116 101 153]
84	15796	HDBT	horizontal nucleus of the diagonal band, transitional part	11	15564	[100 92 122]
85	15804	SePalCo	septopallidal core nucleus	11	15564	[205 28 137]
86	15805	SePalSh	septopallidal shell area	11	15564	[151 245 168]
87	15807	TuSePal	septopallidal part of the olfactory tuberculum	11	15564	[183 134 141]
88	15808	ICjM	island of Calleja major	11	15564	[ 78 65 106]
89	15813	AcbCo	accumbens nucleus, core domain	11	15564	[ 55 231 143]
90	15815	AcbSh	accumbens nucleus, shell domain	11	15564	[226 122 187]
91	15817	TuSeStr	septostriatal part of the olfactory tuberculum	11	15564	[231 179 181]
92	15818	CSPall	central subpallium (classic basal ganglia)	7	15564	[195 165 68]
93	15823	BSTMC	bed nucleus of the stria terminalis, mediocentral division	11	15564	[205 244 122]
94	15829	SIB	substantia innominata/basal nucleus	11	15564	[220 122 243]
95	15830	IPal	internal globus pallidus	11	15564	[211 232 209]
96	15832	HDB	horizontal nucleus of the diagonal band	11	15564	[164 107 25]
97	15833	MCDB	magnocellular diagonal band nucleus	11	15564	[ 73 218 18]
98	15838	BSTLC	bed nucleus of the stria terminalis, laterocentral division	11	15564	[97 97 22]
99	15843	EPal	external globus pallidum	11	15564	[108 237 34]
100	15844	VPal	ventral pallidum	11	15564	[223 121 90]
101	15847	TuPal1	plexiform layer of TuPal	12	15564	[160 18 13]
102	15848	TuPal2	corticoid layer of TuPal	12	15564	[41 71 64]
103	15849	TuPal3	polymorph layer of TuPal	12	15564	[42 19 38]
104	15850	ICjPal	pallidal islands of Calleja	11	15564	[248 252 110]
105	15855	Cau	caudate nucleus	11	15564	[166 130 252]
106	15857	Put	putamen	11	15564	[201 80 69]
107	15858	VStr	ventral striatum	11	15564	[ 70 173 136]
108	15859	IPAC	interstitial nucleus of the posterior limb of the anterior commissure	11	15564	[145 80 183]
109	15860	LSS	laterostriatal stripe	11	15564	[ 98 213 236]
110	15863	TuStr1	plexiform layer of TuStr	12	15564	[ 66 95 209]
111	15864	TuStr2	corticoid layer of TuStr	12	15564	[247 231 82]
112	15865	TuStr3	polymorph layer of TuStr	12	15564	[ 71 35 242]
113	15866	ICjStr	striatal islands of Calleja	11	15564	[178 24 189]
114	15867	ASPall	subpallial amygdala	7	15564	[121 102 101]
115	15872	ASt	amygdalo-striatal transition	11	15564	[ 68 82 120]
116	15874	CeL	central amygdalar nucleus, lateral part	11	15564	[215 68 133]
117	15875	CeC	central amygdalar nucleus, capsular part	11	15564	[165 222 240]
118	15876	IA	intercalated amygdaloid nuclei	11	15564	[181 247 253]
119	15882	BSTLA	bed nucleus of stria terminalis, lateral amygdaloid division	11	15564	[43 81 47]
120	15884	CeM	central amygdaloid nucleus, medial part	11	15564	[ 66 158 103]
121	15899	MePD	medial amygdala, posterodorsal part	11	15564	[247 143 77]
122	15900	MePV	medial amygdala, posteroventral part	11	15564	[229 109 145]
123	15901	MeAD	medial amygdala, anterodorsal part	11	15564	[121 108 111]
124	15902	MeAV	medial amygdala, anteroventral part	11	15564	[137 101 138]
125	15904	VPall	ventral pallium	7	15564	[ 91 236 221]
126	15909	OB-Gr	OB granular layer	11	15564	[ 72 119 55]
127	15910	OB-Ipl	OB inner plexiform layer	11	15564	[191 176 162]
128	15912	OB-Mtr	OB mitral cell layer	11	15564	[ 60 93 175]
129	15913	OB-Opl	OB outer plexiform layer	11	15564	[143 79 27]
130	15915	OB-Glom	OB glomerular layer	11	15564	[ 17 101 139]
131	15916	OB-OF	OB olfactory fiber layer	11	15564	[ 31 109 23]
132	15923	AOV1	layer 1 of AOV cortex	11	15564	[162 78 61]
133	15924	AOV2	layer 2 of AOV cortex	11	15564	[151 180 174]
134	15925	AOV3	layer 3 of AOV cortex	11	15564	[ 10 168 157]
135	15926	AOVE	external part of AOV	11	15564	[245 14 180]
136	15927	Nv	navicular nucleus	11	15564	[134 91 203]
137	15933	BEC	bed nucleus of the external capsule	11	15564	[118 137 180]
138	15934	DEn	dorsal endopiriform nucleus	11	15564	[ 65 110 162]
139	15935	VEn	ventral endopiriform nucleus	11	15564	[161 42 250]
140	15937	VPrP1	layer 1 of VPrP cortex	11	15564	[133 235 142]
141	15938	VPrP2	layer 2 of VPrP cortex	11	15564	[213 247 235]
142	15939	VPrP3	layer 3 of VPrP cortex	11	15564	[ 52 105 243]
143	15944	La	lateral amygdaloid nucleus	11	15564	[ 49 227 119]
144	15945	AHi	amygdalohippocampal area	11	15564	[ 49 171 117]
145	15947	BMA	basomedial amygdaloid nucleus, anterior part	11	15564	[180 70 19]
146	15948	BMP	basomedial amygdaloid nucleus, posterior part	11	15564	[ 24 232 191]
147	15950	PMCo	posteromedial cortical amygdaloid area	11	15564	[174 139 84]
148	15951	LOT	nucleus of the lateral olfactory tract	11	15564	[156 125 102]
149	15952	LOT3	layer 3 of LOT	12	15564	[ 52 90 176]
150	15953	LOT2	layer 2 of LOT	12	15564	[158 127 125]
151	15954	LOT1	layer 1 of LOT	12	15564	[136 159 121]
152	15956	LPall	lateral pallium	7	15564	[247 42 33]
153	15961	AGr	AOB, granular layer	11	15564	[154 171 107]
154	15962	AIPl	AOB, internal plexiform layer	11	15564	[ 96 186 166]
155	15964	AMtr	AOB, mitral cell layer	11	15564	[249 227 197]
156	15965	AOPl	AOB, outer plexiform layer	11	15564	[92 46 39]
157	15967	AGlom	AOB, glomerular layer	11	15564	[115 137 199]
158	15975	AOD1	layer 1 of AOD cortex	11	15564	[ 38 57 154]
159	15976	AOD2	layer 2 of AOD cortex	11	15564	[217 239 250]
160	15977	AOD3	layer 3 of AOD cortex	11	15564	[103 46 177]
161	15978	AODE	external part of AOD	11	15564	[221 33 131]
162	15984	Cl	claustrum	11	15564	[ 69 51 220]
163	15986	LPrP1	layer 1 of LPrP cortex	11	15564	[125 60 121]
164	15987	LPrP2	layer 2 of LPrP cortex	11	15564	[113 219 38]
165	15988	LPrP3	layer 3 of LPrP cortex	11	15564	[108 107 174]
166	15994	BLA	basolateral amygdaloid nucleus, anterior part	11	15564	[184 166 107]
167	15995	BLP	basolateral amygdaloid nucleus, posterior part	11	15564	[160 27 211]
168	15996	BLV	basolateral amygdaloid nucleus, ventral part	11	15564	[187 141 37]
169	15998	APir	amygdalopiriform area	11	15564	[109 88 27]
170	15999	PLCo	posterolateral cortical amygdaloid area	11	15564	[ 36 158 182]
171	16000	ACo	anterior cortical amygdaloid area	11	15564	[244 35 222]
172	16008	FC-1	layer 1 of FCx	11	15564	[141 173 138]
173	16009	FC-2	layer 2 of FCx	11	15564	[ 56 22 136]
174	16010	FC-3	layer 3 of FCx	11	15564	[101 64 46]
175	16011	FC-4	layer 4 of FCx	11	15564	[64 54 74]
176	16012	FC-5	layer 5 of FCx	11	15564	[ 26 219 49]
177	16014	FC-6a	sublayer 6a of FCx	12	15564	[199 121 47]
178	16015	FC-6b	sublayer 6b of FCx	12	15564	[116 139 151]
179	16022	PC-1	layer 1 of PCx	11	15564	[194 237 17]
180	16023	PC-2	layer 2 of PCx	11	15564	[106 225 179]
181	16024	PC-3	layer 3 of PCx	11	15564	[196 99 132]
182	16025	PC-4	layer 4 of PCx	11	15564	[ 99 116 131]
183	16026	PC-5	layer 5 of PCx	11	15564	[ 77 138 60]
184	16027	PC-6	layer 6 of PCx	11	15564	[ 21 247 10]
185	16028	PC-6a	sublayer 6a of PCx	12	15564	[160 29 226]
186	16029	PC-6b	sublayer 6b of PCx	12	15564	[246 134 83]
187	16036	OC-1	layer 1 of OCx	11	15564	[238 137 75]
188	16037	OC-2	layer 2 of OCx	11	15564	[101 15 70]
189	16038	OC-3	layer 3 of OCx	11	15564	[220 122 118]
190	16039	OC-4	layer 4 of OCx	11	15564	[225 241 253]
191	16040	OC-5	layer 5 of OCx	11	15564	[246 204 175]
192	16041	OC-6	layer 6 of OCx	11	15564	[ 63 50 236]
193	16042	OC-6a	sublayer 6a of OCx	12	15564	[121 131 200]
194	16043	OC-6b	sublayer 6b of OCx	12	15564	[ 44 114 216]
195	16050	TC-1	layer 1 of TCx	11	15564	[55 48 84]
196	16051	TC-2	layer 2 of TCx	11	15564	[114 57 149]
197	16052	TC-3	layer 3 of TCx	11	15564	[156 38 249]
198	16053	TC-4	layer 4 of TCx	11	15564	[105 109 71]
199	16054	TC-5	layer 5 of TCx	11	15564	[ 19 166 110]
200	16055	TC-6	layer 6 of TCx	11	15564	[208 183 243]
201	16064	InsC-1	layer 1 of InsCx	11	15564	[229 198 97]
202	16065	InsC-2	layer 2 of InsCx	11	15564	[ 80 224 37]
203	16066	InsC-3	layer 3 of InsCx	11	15564	[ 54 108 192]
204	16067	InsC-4	layer 4 of InsCx	11	15564	[129 15 114]
205	16068	InsC-5	layer 5 of InsCx	11	15564	[ 61 238 62]
206	16069	InsC-6	layer 6 of InsCx	11	15564	[206 48 158]
207	16070	InsC-6a	sublayer 6a of InsCx	12	15564	[188 166 208]
208	16071	InsC-6b	sublayer 6b of InsCx	12	15564	[234 22 81]
209	16078	CC-1	layer 1 of CCx	11	15564	[112 52 57]
210	16079	CC-2	layer 2 of CCx	11	15564	[125 226 189]
211	16080	CC-3	layer 3 of CCx	11	15564	[101 136 227]
212	16081	CC-4	layer 4 of CCx	11	15564	[ 11 180 235]
213	16082	CC-5	layer 5 of CCx	11	15564	[ 53 128 70]
214	16084	CC-6a	sublayer 6a of CCx	12	15564	[239 236 79]
215	16085	CC-6b	sublayer 6b of CCx	12	15564	[157 245 46]
216	16087	PRh-Ect-1	layer 1 of PRh-Ect	11	15564	[224 130 230]
217	16088	PRh-Ect-2	layer 2 of PRh-Ect	11	15564	[140 89 138]
218	16089	PRh-Ect-3	layer 3 of PRh-Ect	11	15564	[116 97 234]
219	16090	PRh-Ect-4	layer 4 of PRh-Ect	11	15564	[188 81 151]
220	16091	PRh-Ect-5	layer 5 of PRh-Ect	11	15564	[204 94 198]
221	16092	PRh-Ect-6	layer 6 of PRh-Ect	11	15564	[ 44 222 118]
222	16094	RSC-1	layer 1 of RSC	11	15564	[119 149 162]
223	16095	RSC-2	layer 2 of RSC	11	15564	[222 163 108]
224	16096	RSC-3	layer 3 of RSC	11	15564	[208 95 61]
225	16097	RSC-4	layer 4 of RSC	11	15564	[224 235 39]
226	16098	RSC-5	layer 5 of RSC	11	15564	[ 52 38 230]
227	16099	RSC-6	layer 6 of RSC	11	15564	[250 33 221]
228	16100	RSC-6a	layer 6a of RSC	12	15564	[100 93 195]
229	16101	RSC-6b	layer 6b of RSC	12	15564	[171 136 128]
230	16108	ER-1	layer 1 of ERCx	11	15564	[145 212 187]
231	16109	ER-2	layer 2 of ERCx	11	15564	[199 63 231]
232	16110	ER-3	layer 3 of ERCx	11	15564	[ 91 54 126]
233	16111	ER-4	layer 4 of ERCx	11	15564	[83 73 90]
234	16112	ER-5	layer 5 of ERCx	11	15564	[44 65 41]
235	16113	ER-6	layer 6 of ERCx	11	15564	[106 86 186]
236	16114	MPall	medial pallium (hippocampal allocortex)	7	15564	[188 209 63]
237	16120	DGHil	hilus of the DG	11	15564	[78 81 54]
238	16122	DGGran	granule cell layer of the DG	11	15564	[127 137 219]
239	16123	DGMol	molecular layer of the DG	11	15564	[ 63 162 37]
240	16132	CA1so	Field CA1, stratum oriens	12	15564	[ 88 138 128]
241	16133	CA1sp	Field CA1, stratum pyramidale	12	15564	[ 26 225 190]
242	16134	CA1sr	Field CA1, stratum radiatum	12	15564	[240 134 254]
243	16135	CA1slm	Field CA1, stratum lacunosum-moleculare	12	15564	[141 129 84]
244	16137	CA2slm	Field CA2, stratum lacunosum-moleculare	12	15564	[235 207 187]
245	16138	CA2so	Field CA2, stratum oriens	12	15564	[235 130 224]
246	16139	CA2sp	Field CA2, stratum pyramidale	12	15564	[ 62 198 12]
247	16140	CA2sr	Field CA2, stratum radiatum	12	15564	[ 66 134 190]
248	16142	CA3so	Field CA3, stratum oriens	12	15564	[136 239 66]
249	16143	CA3sp	Field CA3, stratum pyramidale	12	15564	[155 19 126]
250	16145	CA3sr	Field CA3, stratum radiatum	12	15564	[ 20 225 137]
251	16146	CA3slm	Field CA3, stratum lacunosum-moleculare	12	15564	[ 64 243 152]
252	16153	PyIG	pyramidal layer of IG	11	15564	[ 80 121 23]
253	16158	DPp	dorsal peduncular cortex, periventricular part	11	15564	[129 109 154]
254	16160	DPi	dorsal peduncular cortex, intermediate part	11	15564	[ 67 162 166]
255	16162	PyTT	pyramidal layer of taenia tecta	11	15564	[200 217 130]
256	16170	PyS	pyramidal layer of S	11	15564	[253 41 125]
257	16171	SMol	molecular layer of S	11	15564	[241 246 186]
258	16177	PrSs	superficial stratum of PrS (cortical plate/marginal zone)	10	15564	[72 74 65]
259	16178	PrS-1	layer 1 of PrS	11	15564	[ 44 87 163]
260	16179	PrS-2	layer 2 of PrS	11	15564	[ 15 115 169]
261	16180	PrS-3	layer 3 of PrS	11	15564	[126 247 75]
262	16182	PrS-5	layer 5 of PrS	11	15564	[128 72 211]
263	16184	PrS-6a	layer 6a of PrS	12	15564	[ 86 203 185]
264	16185	PrS-6b	layer 6b of PrS	12	15564	[182 112 11]
265	16192	PaS-1	layer 1 of PaS	11	15564	[135 30 35]
266	16193	PaS-2	layer 2 of PaS	11	15564	[220 47 10]
267	16194	PaS-3	layer 3 of PaS	11	15564	[ 78 55 179]
268	16195	PaS-4	layer 4 of PaS	11	15564	[ 74 248 166]
269	16196	PaS-5	layer 5 of PaS	11	15564	[107 199 44]
270	16197	PaS-6	layer 6 of PaS	11	15564	[220 161 20]
271	16204	SHi	septohippocampal nucleus	11	15564	[233 138 96]
272	16212	PHyA	alar part of peduncular hypothalamus	5	15564	[194 226 34]
273	16217	PPa	paraventricular nucleus, peduncular or principal part	11	15564	[ 14 246 160]
274	16218	PaD	paraventricular nucleus, dorsal part	12	15564	[ 82 237 75]
275	16219	PaC	paraventricular nucleus, cap part	12	15564	[251 201 137]
276	16224	PaR	paraventricular nucleus, rostral part	12	15564	[125 117 94]
277	16226	PaL	paraventricular nucleus, lateral part	11	15564	[ 97 79 118]
278	16227	UDPeF	upper dorsal perifornical nucleus	11	15564	[137 18 232]
279	16228	UDLH	upper dorsal lateral hypothalamic area	11	15564	[145 218 245]
280	16229	LPo	lateral posterior nucleus	11	15564	[164 254 252]
281	16230	PSM	peduncular nucleus of the stria medullaris	11	15564	[ 41 152 15]
282	16232	EPD	dorsal entopeduncular nucleus	11	15564	[244 90 166]
283	16238	A13	A13 dopaminergic cell group	11	15564	[242 188 90]
284	16240	AHP	posterior part of anterior hypothalamic nucleus	11	15564	[ 57 106 64]
285	16242	LDPeF	lower dorsal perifornical nucleus	11	15564	[ 55 107 77]
286	16243	LDLH	lower dorsal lateral hypothalamic area	11	15564	[ 95 183 16]
287	16245	EPV	ventral entopeduncular nucleus	11	15564	[ 66 75 206]
288	16247	PHyB	basal peduncular hypothalamus	5	15564	[ 87 212 35]
289	16252	PBasp	posterobasal nucleus, periventricular part	11	15564	[194 48 114]
290	16254	PBasi	posterobasal nucleus, intermediate part	11	15564	[ 35 22 154]
291	16255	UBLH	upper basal lateral hypothalamic area	11	15564	[205 236 83]
292	16256	UBPeF	upper basal perifornical nucleus	11	15564	[129 154 251]
293	16258	MCSH	magnocellular superficial hypothalamic nucleus	11	15564	[105 74 241]
294	16263	P-DMHp	periventricular domain associated to P-DMH	11	15564	[186 236 172]
295	16266	P-DMHc	core of P-DMH	12	15564	[ 58 100 183]
296	16267	P-DMHs	shell of P-DMH	12	15564	[237 222 209]
297	16268	LBLH	lower basal lateral hypothalamic area	11	15564	[122 100 103]
298	16269	LBPeF	lower basal perifornical nucleus	11	15564	[173 80 14]
299	16271	LTu	lateral tuberal nucleus	11	15564	[ 85 240 227]
300	16272	STh	subthalamic nucleus (migrated)	11	15564	[169 94 144]
301	16273	PSTh	parasubthalamic nucleus (migrated)	11	15564	[ 34 206 20]
302	16279	DTMp	dorsal tuberomammillary nucleus, periventricular part (histaminergic)	11	15564	[207 22 163]
303	16281	DTMi	dorsal tuberomammillary nucleus, intermediate part (histaminergic)	11	15564	[ 51 46 199]
304	16283	PTe	paraterete nucleus	11	15564	[250 250 253]
305	16284	CTM	caudal tuberomammillary nucleus (histaminergic)	11	15564	[239 69 122]
306	16289	PPRM	periventricular periretromammillary nucleus	11	15564	[ 59 148 87]
307	16291	IPRM	intermediate periretromammillary nucleus	11	15564	[38 97 17]
308	16293	LPRM	lateral periretromammillary nucleus	11	15564	[172 108 31]
309	16299	RMM	retromammillary area, medial part	11	15564	[ 78 51 246]
310	16300	SMT	submammillothalamic nucleus	11	15564	[207 153 149]
311	16302	RML	retromammillary area, lateral part	11	15564	[248 99 203]
312	16306	PHyF	floor of peduncular hypothalamus	5	15564	[106 244 156]
313	16311	p3R	roof plate of p3	5	15564	[112 201 179]
314	16313	p3A	alar plate of p3 (alar prethalamus)	5	15564	[ 73 195 122]
315	16320	SM	nucleus of the stria medullaris (prethalamic)	11	15564	[243 249 221]
316	16327	RHy	retrohypothalamic nucleus	11	15564	[227 166 115]
317	16329	Rt	reticular nucleus	11	15564	[198 133 202]
318	16331	SubG	subgeniculate nucleus	11	15564	[204 83 206]
319	16337	p3ZLS	shell of p3ZL	11	15564	[125 175 15]
320	16339	IntC	intercalate nucleus	11	15564	[ 81 250 44]
321	16341	PreG	pregeniculate nucleus	11	15564	[35 91 88]
322	16342	PP	peripeduncular nucleus	11	15564	[217 103 16]
323	16349	RZI	rostral zona incerta	11	15564	[171 47 254]
324	16351	EPAc	accessory entopeduncular nucleus (post-migratory)	11	15564	[222 82 116]
325	16353	p3B	basal plate of p3	5	15564	[175 239 162]
326	16357	p3PEW	p3 portion of the pre-Edinger-Westphal nucleus	11	15564	[226 198 184]
327	16359	p3ZLC	p3 part of the ZL core	11	15564	[107 51 211]
328	16360	CZI	caudal zona incerta	11	15564	[226 246 199]
329	16361	p3Tg	tegmental field of p3 (Forel's field)	11	15564	[160 19 13]
330	16363	p3PBP	p3 portion of parabrachial pigmented nucleus	11	15564	[211 222 245]
331	16365	p3SNC	p3 portion of the substantia nigra pars compacta	11	15564	[ 20 233 84]
332	16366	p3SNR	p3 portion of the substantia nigra pars reticulata	11	15564	[250 108 173]
333	16367	p3PN	p3 portion of paranigral nucleus	11	15564	[198 139 68]
334	16368	p3F	floor plate of p3	5	15564	[ 73 140 182]
335	16374	p3VTA	p3 portion of the ventral tegmental area	11	15564	[180 201 51]
336	16377	p2R	roof plate of p2 (epithalamic roofplate)	5	15564	[111 178 82]
337	16379	BHbC	bed of the habenular commissure	11	15564	[ 97 208 151]
338	16382	p2A	alar plate of p2 (alar thalamus)	5	15564	[ 29 100 197]
339	16388	MHb	medial habenular nucleus	11	15564	[183 197 80]
340	16389	MSHb	medial subhabenular nucleus	11	15564	[143 191 244]
341	16391	LHbM	medial part of the lateral habenular nucleus	11	15564	[204 171 152]
342	16392	LSHb	lateral subhabenular nucleus	11	15564	[241 18 46]
343	16394	LHbL	lateral part of the lateral habenular nucleus	11	15564	[ 47 136 63]
344	16400	PVA	anterior paraventricular nucleus of thalamus	11	15564	[181 17 223]
345	16401	IMD	intermediodorsal nucleus	11	15564	[133 142 168]
346	16402	CM	centromedian nucleus	11	15564	[54 88 51]
347	16403	IAM	interanteromedial nucleus	11	15564	[ 87 244 246]
348	16404	IAD	interanterodorsal nucleus	11	15564	[161 251 227]
349	16405	Rh	rhomboid nucleus	11	15564	[86 99 94]
350	16406	Re	reuniens nucleus, main part	11	15564	[252 233 38]
351	16407	RRe	retroreuniens nucleus	11	15564	[230 141 59]
352	16408	VRe	ventral reuniens nucleus	11	15564	[167 39 73]
353	16410	PT	paratenial nucleus	11	15564	[61 66 57]
354	16412	MDM	medial (magnocellular) part of MD	12	15564	[35 34 42]
355	16413	MDL	lateral (parvicellular) part of MD	12	15564	[ 83 72 193]
356	16414	MDC	central part of MD	12	15564	[140 241 107]
357	16416	PC	paracentral nucleus	12	15564	[110 130 130]
358	16417	OPC	oval paracentral nucleus	12	15564	[122 239 226]
359	16418	CL	central lateral nucleus	12	15564	[129 66 107]
360	16420	AD	anterodorsal nucleus	12	15564	[ 79 35 232]
361	16421	AV	anteroventral nucleus	12	15564	[160 204 214]
362	16422	AM	anteromedial nucleus	12	15564	[225 234 76]
363	16424	VM	ventromedial nucleus	12	15564	[139 141 239]
364	16426	SubM	submedius thalamic nucleus	12	15564	[250 231 122]
365	16428	VL	ventral lateral nucleus	12	15564	[198 176 88]
366	16429	VPM	ventral posteromedial nucleus	12	15564	[174 216 13]
367	16430	VPL	ventral posterolateral nucleus	12	15564	[118 230 88]
368	16431	VPPC	ventral posterior parvicellular nucleus	12	15564	[136 44 184]
369	16432	Po	posterior (ventral) nucleus	12	15564	[24 81 30]
370	16434	LD	laterodorsal nucleus	11	15564	[173 246 140]
371	16435	LP	lateral posterior nucleus	11	15564	[101 153 102]
372	16436	DLG	dorsal lateral geniculate nucleus	11	15564	[ 98 230 250]
373	16441	PVP	posterior paraventricular nucleus	11	15564	[57 37 31]
374	16442	PF	parafascicular nucleus	11	15564	[119 215 64]
375	16445	Sc	scaphoid nucleus	11	15564	[237 173 205]
376	16446	Eth	ethmoid nucleus	11	15564	[250 154 21]
377	16447	SEth	subethmoid nucleus	11	15564	[109 157 199]
378	16448	VLi	ventral linear nucleus	11	15564	[183 203 87]
379	16449	PoT	posterior triangular nucleus	11	15564	[169 225 146]
380	16451	IPo	intermedioposterior nucleus	11	15564	[198 232 46]
381	16452	SG	suprageniculate nucleus	11	15564	[114 236 35]
382	16457	SPFMC	magnocellular (medial) subparafascicular nucleus	11	15564	[224 28 130]
383	16459	SPFPC	parvicellular (lateral) subparafascicular nucleus	11	15564	[190 232 205]
384	16460	PIL	posterior intralaminar nucleus	11	15564	[132 181 43]
385	16462	MG	medial geniculate nucleus	11	15564	[127 83 221]
386	16463	MGV	ventral subnucleus of MG	12	15564	[ 95 217 207]
387	16464	MGD	dorsal subnucleus of MG	12	15564	[217 111 41]
388	16471	p2ZLS	shell of p2ZL	11	15564	[ 24 95 235]
389	16473	IZL	interstitial nucleus of the zona limitans	11	15564	[166 178 20]
390	16474	p2ZLs	superficial stratum of p2ZL	10	15564	[143 93 41]
391	16475	IGL	intergeniculate leaflet	11	15564	[154 116 154]
392	16480	Lim	liminal nucleus	11	15564	[87 90 22]
393	16482	p2LimRt	reticular formation of p2Lim	11	15564	[ 73 191 163]
394	16487	p2B	basal plate of p2	5	15564	[198 219 186]
395	16491	p2PEW	p2 portion of the pre-Edinger-Westphal nucleus	11	15564	[230 153 154]
396	16493	p2ZLC	p2 part of the zona limitans core population	11	15564	[254 42 191]
397	16494	RI	rostral interstitial nucleus	11	15564	[101 58 54]
398	16495	PR	prerubral area	11	15564	[120 184 234]
399	16496	p2PBP	p2 portion of the parabrachial pigmented nucleus	11	15564	[235 110 84]
400	16499	p2SNC	p2 portion of the substantia nigra pars compacta	11	15564	[252 58 170]
401	16500	p2SNR	p2 portion of the substantia nigra pars reticulata	11	15564	[169 212 177]
402	16501	p2PN	p2 portion of paranigral nucleus	11	15564	[164 106 154]
403	16502	p2F	floor plate of p2	5	15564	[237 23 54]
404	16508	p2VTA	p2 portion of the ventral tegmental area	11	15564	[ 90 94 134]
405	16511	p1R	roof plate of p1	5	15564	[189 228 252]
406	16519	p1A	alar plate of p1	5	15564	[217 200 85]
407	16525	PcPD-PAG	PcPD part of the periaqueductal gray	11	15564	[20 15 77]
408	16527	DF	dorsofrontal pretectal nucleus	11	15564	[166 34 174]
409	16529	DFS	superficial dorsofrontal area	11	15564	[ 87 111 137]
410	16534	PcPL-PAG	PcPL part of the periaqueductal gray	11	15564	[205 245 205]
411	16536	APTD	anterior pretectal nucleus, dorsal core part	11	15564	[207 26 67]
412	16538	APTDS	anterior pretectal nucleus, dorsal superficial part	11	15564	[ 58 139 174]
413	16543	PcPV-PAG	PcPV part of the periaqueductal gray	11	15564	[245 68 196]
414	16545	APTV	anterior pretectal nucleus, ventral core part	11	15564	[147 192 156]
415	16547	APTVS	anterior pretectal nucleus, ventral superficial part	11	15564	[146 112 172]
416	16553	JcPD-PAG	JcPD part of the periaqueductal gray	11	15564	[ 32 50 218]
417	16555	DJcP	dorsal juxtacommissural pretectal nucleus	11	15564	[ 78 102 236]
418	16556	SpD	dorsal spiriform nucleus	11	15564	[160 64 20]
419	16563	JcPL-PAG	JcPL part of the periaqueductal gray	11	15564	[174 212 218]
420	16565	JcPLRt	reticular formation of JcPL	11	15564	[69 93 89]
421	16566	SpL	lateral spiriform nucleus	11	15564	[198 136 250]
422	16568	JcP-LTL	JcP contribution to LTL	11	15564	[230 38 49]
423	16573	JcPV-PAG	JcPV part of the periaqueductal gray	11	15564	[ 57 148 112]
424	16575	VJcP	ventral juxtacommissural pretectal nucleus	11	15564	[230 198 218]
425	16577	JcP-LTV	JcP contribution to LTV	11	15564	[135 136 111]
426	16583	CoPD-PAG	CoPD part of the periaqueductal gray	11	15564	[ 85 241 82]
427	16585	MPT	medial pretectal nucleus	11	15564	[ 10 217 47]
428	16586	PrPT	principal pretectal nucleus	11	15564	[ 72 226 60]
429	16587	CoPDRt	reticular formation of CoPD	11	15564	[207 237 38]
430	16589	OPT	olivary pretectal nucleus	11	15564	[192 58 80]
431	16590	DT	dorsal terminal nucleus of the accessory optic tract	11	15564	[ 52 127 57]
432	16595	CoPL-PAG	CoPL part of the periaqueductal gray	11	15564	[114 25 105]
433	16597	PCPC	parvicellular interstitial nucleus of the posterior commissure	11	15564	[130 212 210]
434	16598	IPT	intermediate pretectal nucleus	11	15564	[157 214 68]
435	16599	CoPLRt	reticular formation of CoPL	11	15564	[228 207 36]
436	16601	LTL	lateral terminal nucleus of the accessory optic tract, lateral part	11	15564	[ 56 76 160]
437	16606	CoPV-PAG	CoPV part of the periaqueductal gray	11	15564	[182 96 47]
438	16608	SPT	subpretectal nucleus	11	15564	[226 244 60]
439	16609	MCPC	magnocellular interstitial nucleus of the posterior commissure	11	15564	[ 76 227 50]
440	16611	LTV	lateral terminal nucleus of the accessory optic tract, ventral part	11	15564	[ 30 248 181]
441	16617	p1Lim-PAG	p1Lim part of periaqueductal gray	11	15564	[148 126 162]
442	16619	p1LimRt	reticular formation of p1Lim	11	15564	[124 196 53]
443	16620	InC	interstitial nucleus of Cajal (post-migratory)	11	15564	[115 88 44]
444	16624	p1B	basal plate of p1	5	15564	[199 143 249]
445	16628	p1B-PAG	p1B part of the periaqueductal gray	11	15564	[197 75 100]
446	16629	Dk	nucleus of Darkschewitsch	11	15564	[203 45 215]
447	16630	p1PEW	p1 part of the pre-Edinger-Westphal nucleus	11	15564	[ 24 208 163]
448	16632	p1BRt	basal reticular formation of p1	11	15564	[193 147 214]
449	16633	RPC	red nucleus, parvicellular part	11	15564	[144 81 247]
450	16634	p1PaR	p1 part of the pararubral nucleus	11	15564	[ 20 89 133]
451	16635	p1PBP	p1 part of parabrachial pigmented nucleus	11	15564	[147 224 182]
452	16638	p1SNC	p1 part of the substantia nigra compacta	11	15564	[244 244 211]
453	16639	p1SNR	p1 part of the substantia nigra reticulata	11	15564	[129 20 158]
454	16640	p1PN	p1 portion of the paranigral nucleus	11	15564	[210 93 47]
455	16641	p1F	floor plate of p1	5	15564	[192 246 224]
456	16648	p1VTA	p1 part of the ventral tegmental area	11	15564	[ 54 128 86]
457	16655	BTGC	bed of the tectal gray commissure	11	15564	[ 83 221 216]
458	16656	BTC	bed of the tectal commissure	11	15564	[156 115 232]
459	16658	m1A	alar plate of m1	5	15564	[180 247 52]
460	16663	m1AD-PAG	m1AD (DM) part of periaqueductal gray	11	15564	[179 200 130]
461	16665	m1VPaC	ventral paracommissural tectal nucleus, m1 part	11	15564	[ 62 126 58]
462	16667	m1DPaC	dorsal paracommissural tectal nucleus, m1 part	11	15564	[ 79 118 237]
463	16673	TGDL-PAG	dorsolateral TG part of the periaqueductal gray	11	15564	[108 160 241]
464	16675	TGC	central layers of TG	11	15564	[234 29 127]
465	16676	TGs	superficial stratum of TG	10	15564	[ 97 95 121]
466	16677	TGS	superficial layers of TG	11	15564	[243 137 223]
467	16682	SCDL-PAG	dorsolateral SC part of the periaqueductal gray	11	15564	[ 95 90 111]
468	16683	DpWh	deep white layer of SC	11	15564	[ 31 45 157]
469	16685	DpG	deep gray layer of SC	11	15564	[215 90 35]
470	16686	InWh	intermediate white layer of SC	11	15564	[239 38 44]
471	16687	InG	intermediate gray layer of SC	11	15564	[ 72 173 210]
472	16689	Op	optic fiber layer of SC	11	15564	[244 183 37]
473	16690	SuG	superficial gray layer of SC	11	15564	[185 206 16]
474	16691	Zo	zonal layer of SC	11	15564	[212 192 135]
475	16696	ICDL-PAG	dorsolateral IC periaqueductal gray	11	15564	[144 182 236]
476	16698	CIC	central nucleus of the inferior colliculus	11	15564	[227 181 26]
477	16700	ICIC	internal cortical nucleus of inferior colliculus	11	15564	[ 80 125 97]
478	16701	DCIC	dorsal cortical nucleus of inferior colliculus	11	15564	[151 177 75]
479	16702	ECIC	external cortical nucleus of inferior colliculus	11	15564	[ 38 151 55]
480	16707	TGL-PAG	lateral TG part of the periaqueductal gray	11	15564	[237 141 32]
481	16708	SCL-PAG	lateral SC part of the periaqueductal gray	11	15564	[250 119 20]
482	16709	ICL-PAG	lateral IC periaqueductal gray	11	15564	[103 226 46]
483	16711	ICBR	nucleus of the inferior collicular brachium, rostral part	11	15564	[ 13 122 167]
484	16712	ICBC	nucleus of the inferior collicular brachium, caudal part	11	15564	[160 241 49]
485	16714	SubBR	subbrachial nucleus, rostral part	11	15564	[159 55 17]
486	16715	SubBC	subbrachial nucleus, caudal part	11	15564	[140 240 167]
487	16721	m1Lim-PAG	m1Lim (VL) part of the periaqueductal gray	11	15564	[130 152 63]
488	16723	m1LimRt	m1Lim part of the midbrain reticular formation	11	15564	[196 254 82]
489	16726	m1B	basal plate of m1	5	15564	[ 40 246 201]
490	16730	m1B-PAG	m1B part of the periaqueductal gray	11	15564	[145 111 74]
491	16731	m1PEW	m1 part of the pre-Edinger-Westphal nucleus	11	15564	[246 84 240]
492	16733	3EW	oculomotor nucleus, Edinger-Westphal subnucleus	11	15564	[122 41 17]
493	16734	3M	oculomotor nucleus, main part	11	15564	[ 37 186 181]
494	16735	m1BRt	medial basal reticular formation of m1	11	15564	[240 186 83]
495	16736	m1PaR	pararubral nucleus, m1 part	11	15564	[189 93 102]
496	16737	RMC	red nucleus, magnocellular part	11	15564	[161 230 52]
497	16739	m1PN	m1 part of paranigral nucleus	11	15564	[ 16 171 111]
498	16740	m1SNC	substantia nigra compacta, m1 part	11	15564	[186 127 167]
499	16741	m1SNR	substantia nigra reticulata, m1 part	11	15564	[208 126 138]
500	16742	m1F	floor plate of m1	5	15564	[158 133 151]
501	16748	RLi	rostral linear nucleus	11	15564	[ 78 112 114]
502	16750	m1VTA	ventral tegmental area, m1 part	11	15564	[42 19 25]
503	16753	m2R	m2 roof	5	15564	[123 187 126]
504	16754	m2A	m2 alar plate	5	15564	[28 54 92]
505	16759	PIsD-PAG	dorsal preisthmic part of periaqueductal gray	11	15564	[218 95 75]
506	16766	PIsDL-PAG	dorsolateral preisthmic part of periaqueductal gray	11	15564	[211 103 150]
507	16768	SagD	nucleus sagulum, deep part	11	15564	[ 10 45 200]
508	16770	SagS	nucleus sagulum, superficial part	11	15564	[198 141 249]
509	16775	PIsL-PAG	lateral part of preisthmic periaqueductal gray	11	15564	[157 39 110]
510	16777	CnF	cuneiform nucleus	11	15564	[ 68 241 178]
511	16785	m2Lim-PAG	liminal periaqueductal gray of m2	11	15564	[198 30 248]
512	16787	SCnF	subcuneiform nucleus	11	15564	[238 71 195]
513	16788	m2LimRt	liminal reticular formation of m2	11	15564	[ 72 193 140]
514	16791	m2B	m2 basal plate	5	15564	[106 162 149]
515	16795	m2B-PAG	basal m2 periaqueductal gray	11	15564	[216 131 106]
516	16796	m2DR	m2 part of the dorsal raphe nucleus	11	15564	[207 184 110]
517	16798	m2BRt	reticular formation of basal m2	11	15564	[172 50 16]
518	16799	m2PaR	m2 part of pararubral nucleus	11	15564	[155 129 179]
519	16801	m2PN	m2 part of paranigral nucleus	11	15564	[129 42 218]
520	16802	m2PBP	m2 part of nucleus parabrachialis pigmentosus	11	15564	[191 182 247]
521	16803	m2SNC	m2 part of substantia nigra compacta	11	15564	[182 99 106]
522	16804	m2SNR	m2 part of substantia nigra reticulata	11	15564	[ 94 242 81]
523	16805	m2F	m2 floor plate	5	15564	[152 116 125]
524	16806	m2VTA	m2 part of VTA	11	15564	[105 114 159]
525	16807	IF	interfascicular nucleus	11	15564	[248 176 191]
526	16811	isR	isthmic roof plate	5	15564	[111 97 31]
527	16813	isA	isthmic alar plate	5	15564	[ 68 54 194]
528	16820	CbVWM	white matter of cerebellar vermis	11	15564	[173 211 66]
529	16824	MedM	medial (main) part of Med	13	15564	[183 106 17]
530	16825	MedL	lateral part of Med	13	15564	[232 110 91]
531	16826	MedDL	dorsolateral part of Med	13	15564	[167 99 34]
532	16827	isVeCb	isthmic vestibulocerebellar nucleus	11	15564	[183 235 63]
533	16840	MolV	molecular layer of CbVCx	12	15564	[187 59 53]
534	16841	PkV	Purkinje cell layer of CbVCx	12	15564	[210 142 21]
535	16842	IGrV	internal granular layer of CbVCx	12	15564	[177 141 150]
536	16848	PB-PAG	parabrachial part of the periaqueductal gray	11	15564	[217 147 184]
537	16850	MPB	medial parabrachial nucleus	11	15564	[114 225 11]
538	16852	LPB	lateral parabrachial nucleus	11	15564	[154 86 111]
539	16853	KF	Koelliker-Fuse nucleus	11	15564	[ 88 188 149]
540	16858	Ist-PAG	isthmic part of the periaqueductal gray	11	15564	[213 216 111]
541	16860	DLL	dorsal nucleus of the lateral lemniscus	11	15564	[236 172 29]
542	16862	PBG	parabigeminal nucleus	11	15564	[ 97 251 13]
543	16863	PeLA	perilemniscal isthmic area	11	15564	[187 80 248]
544	16869	isLim-PAG	isthmic liminal part of the periaqueductal gray	11	15564	[234 14 149]
545	16870	isMes5	isthmic part of mesencephalic trigeminal nucleus	11	15564	[218 165 142]
546	16872	MiTg	microcellular tegmental nucleus	11	15564	[142 164 244]
547	16873	isLimRt	isthmic liminal reticular area	11	15564	[247 245 169]
548	16875	isILL	isthmic part of the intermediate lateral lemniscal nucleus	11	15564	[124 228 16]
549	16876	isB	isthmic basal plate	5	15564	[ 35 195 93]
550	16881	isDRDL	dorsolateral isthmic part of the dorsal raphe nucleus	11	15564	[157 165 140]
551	16883	isBLRt	isthmic part of basolateral isthmic reticular formation	11	15564	[240 151 160]
552	16886	isPaL	paralemniscal isthmic area	11	15564	[243 139 206]
553	16891	isDRI	intermediate isthmic part of the dorsal raphe nucleus	11	15564	[113 114 75]
554	16894	isBIRt	basointermediate isthmic reticular formation	11	15564	[162 117 12]
555	16896	isSNR	substantia nigra reticulata, isthmic part	11	15564	[245 63 20]
556	16901	isDRV	ventral isthmic part of dorsal raphe nucleus	11	15564	[243 233 153]
557	16903	4M	trochlear nucleus	11	15564	[ 90 229 130]
558	16904	4Sh	trochlear shell	11	15564	[70 77 63]
559	16905	Pa4	paratrochlear nucleus	11	15564	[234 173 27]
560	16906	CLi	caudal linear (raphe) nucleus	11	15564	[ 77 98 200]
561	16908	isSNC	substantia nigra compacta, isthmic part	11	15564	[104 178 253]
562	16909	IPPr	interpeduncular nucleus, prodromal part	11	15564	[165 29 89]
563	16910	isPN	isthmic portion of paranigral nucleus	11	15564	[ 59 216 180]
564	16911	isF	isthmic floor plate	5	15564	[139 142 184]
565	16914	isVTA	ventral tegmental area, isthmic part	11	15564	[ 42 199 109]
566	16916	r1R	r1 roof plate	5	15564	[ 79 117 91]
567	16919	r1A	r1 alar plate	5	15564	[229 53 78]
568	16926	CbHWM	cerebellar white matter	11	15564	[121 119 211]
569	16930	IntA	anterior part of Int	13	15564	[127 178 206]
570	16931	IntDL	dorsolateral part of Int	13	15564	[ 82 166 153]
571	16932	IntP	posterior part of Int	13	15564	[ 22 232 140]
572	16934	LatDL	dorsolateral part of Lat	13	15564	[ 94 187 129]
573	16935	LatPC	parvicellular part of Lat	13	15564	[113 90 211]
574	16936	r1VeCb	r1 part of vestibulocerebellar nucleus	11	15564	[177 207 174]
575	16937	A4	A4 noradrenergic cell group	11	15564	[ 40 152 229]
576	16939	CbHCx	cortex of cerebellar hemisphere	11	15564	[233 133 162]
577	16947	MolH	molecular layer of CbHCx	12	15564	[148 32 250]
578	16948	PkH	Purkinje cell layer of CbHCx	12	15564	[184 133 127]
579	16949	IGrH	internal granular layer of CbHCx	12	15564	[186 37 252]
580	16953	r1SuVe	r1 part of superior vestibular nucleus	11	15564	[140 114 127]
581	16957	r1Pr5	r1 part of principal trigeminal sensory nucleus	11	15564	[225 77 132]
582	16958	r1DPCRt	r1 part of dorsal parvicellular reticular formation	11	15564	[ 92 56 252]
583	16962	r1VPCRt	r1 part of ventral parvicellular reticular formation	11	15564	[189 34 99]
584	16964	LDTg	laterodorsal tegmental nucleus	11	15564	[ 30 50 163]
585	16966	r1Mes5	r1 part of the 'mesencephalic' trigeminal nucleus	11	15564	[215 239 44]
586	16967	r1B	r1 basal plate	5	15564	[114 15 27]
587	16972	LC	locus coeruleus	11	15564	[127 71 224]
588	16973	Bar	nucleus of Barrington	11	15564	[236 248 120]
589	16974	NPS	neuropeptide-S nucleus	11	15564	[ 81 200 76]
590	16978	r1BLRt	r1 part of basolateral reticular formation	11	15564	[127 150 254]
591	16982	r1ILL	r1 part of intermediate nucleus of the lateral lemniscus	11	15564	[ 96 117 98]
592	16988	r1BICG	r1 part of basointermediate central gray	11	15564	[ 98 227 83]
593	16991	r1BIRt	r1 part of basointermediate reticular formation	11	15564	[241 188 136]
594	16992	r1SubC	nucleus subcoeruleus, r1 part	11	15564	[ 40 123 60]
595	16998	r1DR	r1 part of dorsal raphe nucleus	11	15564	[ 70 98 103]
596	16999	Sph	sphenoid nucleus	11	15564	[ 74 125 208]
597	17001	DTgC	core part of DTg	12	15564	[193 80 131]
598	17002	DTgS	shell part of DTg	12	15564	[ 56 116 190]
599	17005	IPA	apical interpeduncular nucleus	11	15564	[227 213 17]
600	17006	Rbd	rhabdoid interpeduncular nucleus	11	15564	[159 245 15]
601	17007	VTg	ventral tegmental nucleus	11	15564	[ 60 36 153]
602	17008	ATg	anterior tegmental nucleus	11	15564	[199 17 109]
603	17009	PTg	posterior tegmental nucleus	11	15564	[70 90 62]
604	17010	r1PMnR	r1 part of paramedian raphe nucleus	11	15564	[ 77 245 96]
605	17011	r1MnR	r1 part of median raphe nucleus	11	15564	[ 54 197 25]
606	17012	r1BMRt	r1 part of basomedial reticular formation	11	15564	[ 11 208 242]
607	17014	IPR	rostral interpeduncular nucleus	11	15564	[238 199 97]
608	17018	IPC	caudal interpeduncular nucleus	11	15564	[ 82 110 52]
609	17022	r1F	r1 floor plate	5	15564	[ 17 128 177]
610	17024	r2R	r2 roof plate	5	15564	[ 46 194 186]
611	17025	r2A	r2 alar plate	5	15564	[153 51 157]
612	17029	r2DC	r2 part of dorsal cochlear nucleus	11	15564	[222 86 151]
613	17030	r2AVC	r2 part of anteroventral cochlear nucleus	11	15564	[224 72 29]
614	17034	r2SuVe	r2 part of superior vestibular nucleus	11	15564	[111 154 25]
615	17039	r2Pr5	r2 part of principal trigeminal sensory nucleus	11	15564	[225 162 14]
616	17040	r2-5Tr	r2 part of trigeminal transition zone	11	15564	[249 176 49]
617	17041	r2DPCRt	r2 part of dorsal parvicellular reticular formation	11	15564	[246 141 16]
618	17045	r2-5M	r2 part of the trigeminal motor nucleus	11	15564	[ 76 54 108]
619	17046	5Te	temporal muscle trigeminal motor cell group	12	15564	[ 22 146 135]
620	17047	5Ma	masseter muscle trigeminal motor cell group	12	15564	[113 145 191]
621	17048	5Pt	pterigoid muscle trigeminal motor cell group	12	15564	[103 157 180]
622	17049	5TT	temporotympanic muscle trigeminal motor cell group	12	15564	[206 102 174]
623	17050	r2LimCG	r2 liminal central gray	11	15564	[182 187 56]
624	17051	r2VPCRt	r2 part of the ventral parvicellular reticular formation	11	15564	[218 67 195]
625	17053	r2B	r2 basal plate	5	15564	[244 73 47]
626	17059	r2SubC	r2 part of nucleus subcoeruleus	11	15564	[ 73 195 189]
627	17060	r2MPL	r2 part of medial paralemniscal nucleus	11	15564	[ 63 221 244]
628	17062	r2BLRt	r2 part of basolateral reticular formation	11	15564	[169 132 79]
629	17064	r2VLL	r2 part of ventral lateral lemniscal nucleus	11	15564	[ 86 56 230]
630	17070	r2BICG	r2 part of central gray	11	15564	[123 99 240]
631	17075	DMTg	dorsomedial tegmental nucleus	11	15564	[145 36 56]
632	17076	r2BIRt	r2 part of basointermediate reticular formation	11	15564	[172 152 223]
633	17077	r2PMnR	r2 part of paramedian raphe nucleus	11	15564	[197 123 214]
634	17083	PDTg	posterodorsal tegmental nucleus	11	15564	[177 136 53]
635	17084	Inc	nucleus incertus	11	15564	[ 92 160 225]
636	17086	r2BMRt	r2 part of basomedial reticular formation	11	15564	[ 38 210 96]
637	17087	r2PPnR	r2 part of prepontine raphe nucleus	11	15564	[226 219 97]
638	17088	r2MnR	r2 part of median raphe nucleus	11	15564	[251 138 125]
639	17090	RMTg	rostromedial tegmental nucleus	11	15564	[181 220 70]
640	17091	r2F	r2 floor plate	5	15564	[132 43 31]
641	17094	r3R	r3 roof plate	5	15564	[116 109 121]
642	17095	r3A	r3 alar plate	5	15564	[241 44 226]
643	17099	r3DC	r3 part of dorsal cochlear nucleus	11	15564	[134 79 99]
644	17100	r3AVC	r3 part of anteroventral cochlear nucleus	11	15564	[114 207 186]
645	17104	r3LVe	r3 part of lateral vestibular nucleus	11	15564	[140 206 89]
646	17105	r3MVeMC	r3 part of magnocellular medial vestibular nucleus	11	15564	[108 110 55]
647	17106	r3MVePC	r3 part of parvicellular medial vestibular nucleus	11	15564	[ 33 227 25]
648	17110	r3Sp5O	r3 part of spinal trigeminal sensory column, oral part	11	15564	[ 79 47 202]
649	17111	r3-5Tr	r3 part of trigeminal transition zone	11	15564	[ 45 165 204]
650	17112	r3DPCRt	r3 part of dorsal parvicellular reticular formation	11	15564	[ 32 177 185]
651	17116	r3-5M	r3 part of the trigeminal motor nucleus	11	15564	[134 122 246]
652	17117	5ADi	anterior digastric muscle trigeminal motor cell group	12	15564	[146 91 217]
653	17118	r3VLL	r3 part of ventral lateral lemniscal nucleus	11	15564	[ 32 121 223]
654	17119	r3MPL	r3 part of medial paralemniscal nucleus	11	15564	[ 13 159 253]
655	17121	r3VPCRt	r3 part of ventral parvicellular reticular formation	11	15564	[161 234 209]
656	17122	r3LimCG	r3 liminal central gray	11	15564	[154 189 217]
657	17123	r3B	r3 basal plate	5	15564	[199 119 171]
658	17128	r3BLCG	r3 part of basolateral central gray	11	15564	[142 76 110]
659	17130	r3BLRt	r3 part of basolateral reticular formation	11	15564	[178 243 204]
660	17136	r3CGA	r3 part of central gray nucleus alpha	11	15564	[153 133 142]
661	17137	r3CGB	r3 part of central gray nucleus beta	11	15564	[190 73 246]
662	17140	r3BIRt	r3 part of basointermediate reticular formation	11	15564	[ 26 12 254]
663	17142	r3LPn	r3 part of lateral pontine nuclei	11	15564	[ 86 61 237]
664	17149	r3PnR	r3 pontine raphe nucleus	11	15564	[133 146 138]
665	17150	r3RtTgS	r3 part of reticulotegmental nucleus, shell portion	11	15564	[112 58 170]
666	17151	r3RtTgC	r3 part of reticulotegmental nucleus, core portion	11	15564	[202 111 134]
667	17152	r3BMRt	r3 part of basomedial reticular formation	11	15564	[119 246 204]
668	17154	r3MPn	r3 part of medial pontine nuclei	11	15564	[243 105 152]
669	17155	r3F	r3 floor plate	5	15564	[174 243 80]
670	17157	r4R	r4 roof plate	5	15564	[234 205 59]
671	17158	r4A	r4 alar plate	5	15564	[192 96 116]
672	17162	r4DC	r4 part of dorsal cochlear nucleus	11	15564	[124 194 11]
673	17163	r4PVC	r4 part of posteroventral cochlear nucleus	11	15564	[ 92 159 200]
674	17167	r4LVe	r4 part of lateral vestibular nucleus	11	15564	[ 48 172 190]
675	17168	r4MVeMC	r4 part of magnocellular medial vestibular nucleus	11	15564	[250 132 43]
676	17169	r4MVePC	r4 part of parvocellular medial vestibular nucleus	11	15564	[157 154 227]
677	17173	r4Sp5O	r4 part of descending trigeminal sensory nucleus, oral part	11	15564	[41 43 47]
678	17175	r4DPCRt	r4 part of dorsal parvicellular reticular formation	11	15564	[155 160 66]
679	17179	r4LimCG	r4 liminal central gray	11	15564	[128 121 206]
680	17180	r4VPCRt	r4 part of ventral parvicellular reticular formation	11	15564	[195 50 140]
681	17182	r4B	r4 basal plate	5	15564	[ 84 123 159]
682	17189	EVe	efferent vestibular nucleus	11	15564	[195 29 241]
683	17190	SGe	supragenual nucleus	11	15564	[ 92 60 115]
684	17191	r4BLRt	r4 part of basolateral reticular formation	11	15564	[ 33 85 214]
685	17193	r4VLL	r4 part of ventral lateral lemniscal nucleus	11	15564	[ 60 49 231]
686	17194	r4MPL	r4 part of medial paralemniscal nucleus	11	15564	[ 53 254 85]
687	17200	r4BIIZ	r4 part of basointermediate intermediate zone	11	15564	[123 116 237]
688	17201	r4CGA	r4 part of central gray nucleus alpha	11	15564	[ 32 32 231]
689	17202	r4CGB	r4 part of central gray nucleus beta	11	15564	[ 73 155 141]
690	17204	r4BIRt	r4 part of basointermediate reticular formation	11	15564	[157 93 108]
691	17206	r4LPn	r4 part of lateral pontine nuclei	11	15564	[ 81 64 225]
692	17213	r4RtTgS	r4 part of reticulotegmental nucleus, shell portion	11	15564	[ 78 104 122]
693	17214	r4RtTgC	r4 part of reticulotegmental nucleus, core portion	11	15564	[198 90 37]
694	17215	r4BMRt	r4 part of basomedial reticular formation	11	15564	[ 40 97 226]
695	17216	r4PnR	r4 part of pontine raphe cell population	11	15564	[164 136 43]
696	17218	r4MPn	r4 part of medial pontine nuclei	11	15564	[219 32 194]
697	17219	r4F	r4 floor plate	5	15564	[222 35 84]
698	17222	r5R	r5 roof plate	5	15564	[ 15 189 220]
699	17223	r5A	r5 alar plate	5	15564	[116 78 17]
700	17227	r5DC	r5 part of dorsal cochlear nucleus	11	15564	[250 222 75]
701	17228	r5PVC	r5 part of posteroventral cochlear nucleus	11	15564	[100 82 74]
702	17232	r5SpVe	r5 part of spinal vestibular nucleus	11	15564	[251 90 182]
703	17233	r5MVeMC	r5 part of magnocellular medial vestibular nucleus	11	15564	[ 55 106 145]
704	17234	r5MVePC	r5 part of parvocellular medial vestibular nucleus	11	15564	[210 131 67]
705	17238	r5Sp5O	r5 part of the oral Sp5 subnucleus	11	15564	[204 90 181]
706	17240	r5Sol	r5 (gustatory) part of solitary complex	11	15564	[246 198 97]
707	17241	r5DPCRt	r5 part of dorsal parvicellular reticular formation	11	15564	[171 58 39]
708	17245	r5LimCG	r5 liminal central gray	11	15564	[254 76 83]
709	17246	r5VPCRt	r5 part of ventral parvicellular reticular formation	11	15564	[122 222 181]
710	17247	r5A5	r5 part of A5 noradrenergic cell group	11	15564	[ 65 188 235]
711	17248	SS	superior salivatory parasympathetic nucleus	11	15564	[179 108 81]
712	17249	CAT	nucleus of the central acoustic tract	11	15564	[ 95 57 105]
713	17250	r5B	r5 basal plate	5	15564	[194 242 210]
714	17257	r5BLRt	r5 part of basolateral reticular formation	11	15564	[126 186 85]
715	17259	r5VLL	r5 part of ventral lateral lemniscal nucleus	11	15564	[ 99 180 77]
716	17260	DPeO	dorsal periolivary nucleus	11	15564	[203 57 91]
717	17261	LSO	lateral superior olive	11	15564	[109 91 94]
718	17262	MSO	medial superior olive	11	15564	[ 30 28 151]
719	17263	RPeO	rostral periolivary nucleus	11	15564	[165 75 232]
720	17264	SPeO	superior periolivary nucleus	11	15564	[ 26 202 247]
721	17265	VLPeO	ventrolateral periolivary nucleus	11	15564	[190 40 151]
722	17270	r5BIIZ	r5 part of basointermediate intermediate zone	11	15564	[247 185 159]
723	17272	r5BIRt	r5 part of basointermediate reticular formation	11	15564	[117 101 239]
724	17274	LTz	lateral trapezoid nucleus	11	15564	[ 20 108 203]
725	17279	6M	abducens motor nucleus	11	15564	[245 36 233]
726	17281	Pa6	para-abducens nucleus	11	15564	[126 114 60]
727	17282	RPnRt	retropontine reticular area	11	15564	[191 15 42]
728	17283	r5BMRt	r5 part of basomedial reticular formation	11	15564	[220 161 51]
729	17284	r5RM	nucleus raphe magnus, r5 part	11	15564	[246 238 235]
730	17287	MTz	medial trapezoid nucleus	11	15564	[154 114 148]
731	17289	r5F	r5 floor plate	5	15564	[ 74 118 131]
732	17291	r6R	r6 roof plate	5	15564	[ 20 83 218]
733	17292	r6A	r6 alar plate	5	15564	[212 171 196]
734	17296	r6DC	r6 part of dorsal cochlear nucleus	11	15564	[ 60 208 149]
735	17297	r6PVC	r6 part of posteroventral cochlear nucleus	11	15564	[207 244 94]
736	17301	r6SpVe	r6 part of spinal vestibular nucleus	11	15564	[ 30 172 244]
737	17302	r6MVeMC	r6 part of magnocellular medial vestibular nucleus	11	15564	[128 34 28]
738	17303	r6MVePC	r6 part of parvocellular medial vestibular nucleus	11	15564	[222 92 224]
739	17307	r6Sp5O	r6 part of spinal trigeminal nucleus, pars oralis	11	15564	[ 68 230 134]
740	17308	r6-5Tr	r6 part of trigeminal transition zone	11	15564	[30 41 23]
741	17309	r6Sol	r6 (gustatory) part of solitary complex	11	15564	[ 43 218 96]
742	17310	r6DPCRt	r6 part of dorsal parvicellular reticular formation	11	15564	[99 75 51]
743	17314	r6LimCG	r6 liminal central gray	11	15564	[125 210 120]
744	17315	r6VPCRt	r6 part of ventral parvicellular reticular formation	11	15564	[142 25 111]
745	17317	7M	facial motor nucleus	11	15564	[ 67 181 133]
746	17318	r6B	r6 basal plate	5	15564	[199 147 30]
747	17325	r6BLRt	r6 part of the basolateral reticular formation	11	15564	[ 80 225 79]
748	17327	RTZ	retrotrapezoid nucleus	11	15564	[143 89 209]
749	17332	r6BIIZ	r6 part of basointermediate intermediate zone	11	15564	[111 164 200]
750	17334	r6BIRt	r6 part of basointermediate reticular formation	11	15564	[210 50 212]
751	17336	r6PGi	r6 part of paragigantocellular nucleus	11	15564	[ 59 162 38]
752	17337	r6RVM	r6 part of rostral ventromedial reticular area	11	15564	[135 115 87]
753	17342	r6Pr	r6 part of nucleus prepositus	11	15564	[132 246 159]
754	17344	r6BMRt	r6 part of basomedial reticular formation	11	15564	[244 105 180]
755	17345	r6RM	raphe magnus nucleus, r6 part	11	15564	[243 234 46]
756	17346	r6Gi	r6 part of gigantocellular reticular area	11	15564	[208 231 130]
757	17347	r6GiV	r6 part of ventral gigangocellular reticular area	11	15564	[43 63 46]
758	17350	r6PPy	r6 part of parapyramidal nucleus	11	15564	[58 38 84]
759	17351	r6F	r6 floor plate	5	15564	[151 91 214]
760	17354	r7R	r7 roof plate	5	15564	[116 147 127]
761	17355	r7A	r7 alar plate	5	15564	[ 76 133 73]
762	17359	r7DC	r7 part of the dorsal cochlear nucleus	11	15564	[189 239 199]
763	17360	r7PVC	r7 part of the posteroventral cochlear nucleus	11	15564	[155 192 111]
764	17364	r7SpVe	r7 part of spinal vestibular nucleus	11	15564	[ 43 190 215]
765	17365	r7MVePC	r7 part of parvocellular medial vestibular nucleus	11	15564	[201 159 202]
766	17369	r7Sp5I	r7 part of spinal trigeminal nucleus, interpolar part	11	15564	[193 110 31]
767	17370	r7-5Tr	r7 part of trigeminal transition zone	11	15564	[121 71 228]
768	17371	r7Sol	r7 (gustatory) part of solitary complex	11	15564	[ 30 103 114]
769	17372	r7DPCRt	r7 part of dorsal parvicellular reticular formation	11	15564	[205 58 215]
770	17376	r7LimCG	r7 liminal central gray	11	15564	[93 28 36]
771	17378	r7Amb	r7 portion of ambiguous motor nucleus	11	15564	[236 130 216]
772	17379	r7VPCRt	r7 part of ventral parvicellular reticular formation	11	15564	[172 249 206]
773	17380	r7B	r7 basal plate	5	15564	[203 179 107]
774	17387	r7BLRt	r7 part of basolateral reticular formation	11	15564	[ 62 205 70]
775	17389	RVL	rostral ventrolateral reticular area	11	15564	[180 126 149]
776	17394	r7BIIZ	r7 part of the basointermediate intermediate zone	11	15564	[247 49 76]
777	17396	r7BIRt	r7 part of the basointermediate reticular formation	11	15564	[ 68 223 94]
778	17398	r7PGi	r7 part of paragigantocellular nucleus	11	15564	[ 21 155 212]
779	17399	r7RVM	r7 part of rostral ventromedial reticular area	11	15564	[234 195 25]
780	17404	r7Pr	r7 part of nucleus prepositus	11	15564	[149 94 91]
781	17405	r7-12M	r7 portion of the hypoglossal motor nucleus	11	15564	[33 46 50]
782	17406	r7Ro	r7 part of the nucleus of Roller	11	15564	[193 213 49]
783	17409	r7BMRt	r7 part of basomedial reticular formation	11	15564	[174 228 247]
784	17410	r7Gi	r7 part of gigantocellular reticular area	11	15564	[ 29 205 49]
785	17411	r7GiV	r7 part of ventral gigangocellular reticular area	11	15564	[226 240 88]
786	17413	r7-RP	r7 raphe pallidus cell population	11	15564	[220 158 148]
787	17414	r7PPy	r7 part of parapyramidal nucleus	11	15564	[ 83 161 69]
788	17415	r7F	r7 floor plate	5	15564	[111 182 162]
789	17417	r8R	r8 roof plate	5	15564	[168 44 49]
790	17418	r8A	r8 alar plate	5	15564	[ 56 156 215]
791	17422	r8SpVe	r8 part of spinal vestibular nucleus	11	15564	[108 146 208]
792	17423	r8MVePC	r8 part of parvocellular medial vestibular nucleus	11	15564	[155 82 126]
793	17427	r8Sp5I	r8 part of spinal trigeminal nucleus, interpolar part	11	15564	[123 170 116]
794	17429	r8Sol	r8 (gustatory) part of solitary complex	11	15564	[68 77 68]
795	17430	r8DPCRt	r8 part of dorsal parvicellular reticular formation	11	15564	[185 153 32]
796	17434	r8VPCRt	r8 part of ventral parvicellular reticular formation	11	15564	[29 22 96]
797	17435	r8-10M	r8 portion of vagal motor nucleus	11	15564	[155 237 186]
798	17436	r8Amb	r8 portion of ambiguous motor nucleus	11	15564	[242 165 151]
799	17437	r8B	r8 basal plate	5	15564	[222 105 204]
800	17442	r8-BLIZ	r8 part of basolateral intermediate zone	11	15564	[84 20 61]
801	17444	r8BLRt	r8 part of basolateral reticular formation	11	15564	[152 122 116]
802	17446	r8LRt	r8 part of lateral reticular nucleus	11	15564	[ 65 115 112]
803	17447	r8LRtPC	parvocellular part of r8LRt	11	15564	[137 100 196]
804	17448	r8Li	r8 part of linear nucleus	11	15564	[ 18 112 229]
805	17453	r8BIIZ	r8 part of basointermediate intermediate zone	11	15564	[ 52 237 51]
806	17454	r8IS	r8 part of nucleus intercalatus Staderini	11	15564	[188 73 66]
807	17456	r8BIRt	r8 part of basointermediate reticular formation	11	15564	[202 233 17]
808	17459	r8PGi	r8 part of the paragigantocellular nucleus	11	15564	[244 155 145]
809	17465	r8-12M	r8 portion of the hypoglossal motor nucleus	11	15564	[ 19 13 247]
810	17466	r8Ro	r8 part of nucleus of Roller	11	15564	[193 48 126]
811	17469	r8BMRt	r8 part of basomedial reticular formation	11	15564	[238 12 194]
812	17470	r8Gi	r8 part of gigantocellular reticular area	11	15564	[251 112 248]
813	17471	r8GiV	r8 part of ventral gigangocellular reticular area	11	15564	[ 81 87 189]
814	17473	r8-RP	r8 raphe pallidus cell population	11	15564	[221 154 247]
815	17474	r8-IO	r8 part of inferior olive	11	15564	[ 55 244 21]
816	17475	r8F	r8 floor plate	5	15564	[241 245 46]
817	17477	r9R	r9 roof plate	5	15564	[131 220 163]
818	17478	r9A	r9 alar plate	5	15564	[128 168 190]
819	17482	r9SpVe	r9 part of spinal vestibular nucleus	11	15564	[15 34 99]
820	17483	r9MVePC	r9 part of parvocellular medial vestibular nucleus	11	15564	[103 105 235]
821	17484	r9ECu	r9 part of external cuneate nucleus	11	15564	[183 227 118]
822	17488	r9Sp5I	r9 part of spinal trigeminal nucleus, interpolar part	11	15564	[ 79 209 230]
823	17489	r9-5Tr	r9 part of trigeminal transition zone	11	15564	[ 82 236 96]
824	17490	r9Sol	r9 (gustatory) part of solitary complex	11	15564	[ 78 52 132]
825	17491	r9Gr	r9 part of nucleus gracilis	11	15564	[161 61 177]
826	17493	r9DPCRt	r9 part of dorsal parvicellular reticular formation	11	15564	[ 88 147 177]
827	17497	r9VPCRt	r9 part of ventral parvicellular reticular formation	11	15564	[246 120 250]
828	17498	r9-10M	r9 portion of vagal motor nucleus (postmigratory)	11	15564	[128 50 19]
829	17499	r9Amb	r9 portion of ambiguous motor nucleus (postmigratory)	11	15564	[108 115 227]
830	17500	r9B	r9 basal plate	5	15564	[116 252 160]
831	17505	r9BLIZ	r9 part of the basolateral intermediate zone	11	15564	[179 131 225]
832	17507	r9BLRt	r9 part of the basolateral reticular formation	11	15564	[100 147 119]
833	17509	r9LRt	r9 part of the lateral reticular nucleus	11	15564	[253 213 99]
834	17510	r9LRtPC	parvocellular part of the r9LRt	11	15564	[246 105 81]
835	17511	r9Li	r9 part of linear nucleus	11	15564	[130 244 251]
836	17516	r9BIIZ	r9 part of basointermediate intermediate zone	11	15564	[ 96 135 19]
837	17517	r9IS	r9 part of nucleus intercalatus Staderini	11	15564	[239 17 34]
838	17519	r9BIRt	r9 part of basointermediate reticular formation	11	15564	[189 75 84]
839	17521	r9PGi	r9 part of paragigantocellular nucleus	11	15564	[223 65 147]
840	17527	r9-12M	r9 portion of the hypoglossal motor nucleus	11	15564	[188 92 197]
841	17528	r9Ro	r9 part of nucleus of Roller	11	15564	[101 183 28]
842	17531	r9BMRt	r9 part of basomedial reticular formation	11	15564	[ 52 101 142]
843	17532	r9Gi	r9 part of gigantocellular reticular area	11	15564	[169 145 185]
844	17533	r9GiV	r9 part of ventral gigangocellular reticular area	11	15564	[143 208 208]
845	17535	r9-RP	r9 raphe pallidus cell population	11	15564	[142 174 31]
846	17536	r9-IO	r9 part of the inferior olive	11	15564	[220 158 240]
847	17537	r9F	r9 floor plate	5	15564	[ 33 163 32]
848	17540	r10A	r10 alar plate	5	15564	[ 72 141 208]
849	17544	r10SpVe	r10 part of spinal vestibular nucleus	11	15564	[131 249 131]
850	17546	r10ECu	r10 part of external cuneate nucleus	11	15564	[ 84 192 117]
851	17550	r10Sp5C	r10 part of spinal trigeminal nucleus, caudal part	11	15564	[ 15 84 220]
852	17552	r10Sol	r10 part of solitary complex	11	15564	[192 15 16]
853	17553	r10Gr	r10 part of nucleus gracilis	11	15564	[126 232 104]
854	17555	r10DPCRt	r10 part of dorsal parvicellular reticular formation	11	15564	[149 234 190]
855	17559	r10VPCRt	r10 part of ventral parvicellular reticular formation	11	15564	[ 54 63 143]
856	17560	r10-10M	r10 part of vagal motor nucleus	11	15564	[243 101 94]
857	17562	r10B	r10 basal plate	5	15564	[177 148 187]
858	17567	r10BLIZ	r10 part of the basolateral intermediate zone	11	15564	[221 54 87]
859	17569	r10BLRt	r10 part of basolateral reticular formation	11	15564	[ 92 173 80]
860	17575	r10IS	r10 part of nucleus intercalatus Staderini	11	15564	[ 83 227 122]
861	17578	r10-11M	r10 part of accessory motor nucleus	11	15564	[ 88 10 195]
862	17579	r10BIRt	r10 part of basointermediate reticular formation	11	15564	[156 16 214]
863	17585	r10-12M	r10 portion of the hypoglossal motor nucleus	11	15564	[ 11 83 235]
864	17586	r10Ro	r10 part of nucleus of Roller	11	15564	[133 109 130]
865	17589	r10BMRt	r10 part of basomedial reticular formation	11	15564	[203 196 138]
866	17590	r10Gi	r10 part of gigantocellular reticular area	11	15564	[194 123 130]
867	17591	r10GiV	r10 part of ventral gigangocellular reticular area	11	15564	[236 73 58]
868	17593	r10-RP	r10 raphe pallidus cell population	11	15564	[210 198 114]
869	17594	r10-IO	r10 part of the inferior olive	11	15564	[249 42 218]
870	17595	r10F	r10 floor plate	5	15564	[239 199 91]
871	17598	r11A	r11 alar plate	5	15564	[102 59 186]
872	17606	r11Sp5C	r11 part of spinal trigeminal nucleus, caudal part	11	15564	[168 55 19]
873	17608	r11Sol	r11 part of solitary complex	11	15564	[123 92 100]
874	17609	r11Gr	r11 part of nucleus gracilis	11	15564	[165 126 247]
875	17615	r11LimCG	r11 liminal central gray	11	15564	[171 232 67]
876	17620	r11B	r11 basal plate	5	15564	[196 129 253]
877	17625	r11BLIZ	r11 part of the basolateral intermediate zone	11	15564	[236 12 47]
878	17633	r11BIIZ	r11 part of basointermediate intermediate zone	11	15564	[112 214 115]
879	17636	r11BIRt	r11 part of basointermediate reticular formation	11	15564	[148 39 185]
880	17645	r11BMRt	r11 part of basomedial reticular formation	11	15564	[ 60 147 92]
881	17646	r11Gi	r11 part of gigantocellular reticular area	11	15564	[113 55 48]
882	17647	r11GiV	r11 part of ventral gigangocellular reticular area	11	15564	[ 57 218 16]
883	17649	r11-RP	r11 part of nucleus raphe pallidus	11	15564	[206 34 65]
884	17650	r11F	r11 floor plate	5	15564	[168 147 52]
885	17692	SpB	SpC basal plate (anterior horn)	5	15564	[ 44 43 204]
886	17733	SpBMs	superficial stratum of SpBM	10	15564	[ 86 124 89]
887	17734	SpF	SpC floor plate	5	15564	[180 68 89]
888	111220572	PaS-6a	layer 6a of PaS	12	15564	[233 160 35]
889	111220574	PaS-6b	layer 6b of PaS	12	15564	[163 86 212]
890	112892275	Fcs	superficial stratum of the Fc	10	15564	[150 45 180]
891	112892283	m1PBP	m1 part of parabrachialis pigmentosus	11	15564	[ 71 244 198]
892	112892315	isDRW	lateral wings of the dorsal raphe nucleus	11	15564	[161 85 34]
893	114403731	r11Ro	r11 part of nucleus of Roller	10	15564	[173 160 44]
894	124372424	r1Y	r1 part of vestibular nucleus Y	11	15564	[224 50 21]
895	124372440	r1LPn	r1 part of lateral pontine nuclei	11	15564	[ 71 201 168]
896	124372444	MnIPR	median part of IPR	11	15564	[ 14 148 165]
897	124372448	MnIPC	median part of IPC	11	15564	[159 108 92]
898	124372452	r2Y	r2 part of vestibular nucleus Y	11	15564	[ 38 245 248]
899	124372464	r2LPn	r2 part of lateral pontine nuclei	11	15564	[ 73 244 210]
900	126531028	MnIPPr	median part of IPPr	11	15564	[123 110 200]
901	127201621	r11-IO	r11 part of the inferior olive	11	15564	[171 148 184]
